# Supplementary material
Source: Research Square preprint supplement (doi:10.21203/rs.3.rs-9033968/v1)
Supplement: Supplementary file 1 [file 150789b08a7431836e08b945.xlsx]

## Sheet: Characteristics and demographic
Article	Authors	Journal	Year	Number of patients/participants	Type of cancer	AI/ML Type	Variables	Outcome/Output	CVD outcome identification	Validation/testing/ clinical application	Reason for Model (Imaging vs. Prediction)	Results	Conclusion	Notes	Extracted by
A deep Boltzmann machine-driven level set method for heart motion tracking using cine MRI images.	Wu J and Mazur TR and Ruan S and Lian C and Daniel N and Lashmett H and Ochoa L and Zoberi I and Anastasio MA and Gach HM and Mutic S and Thomas M and Li H	Medical image analysis	2018	19	Unspecific	Generative model: Deep Boltzmann Machine + level set	Cine MRI cardiac contours; no clinical variables	Heart segmentation + motional tracking	No clinical events	internal (training + testing on volunteers)	Imaging/heart motion	>segmentation: DSC% = 89.55 (+- 2.26) , MME = 4.26 (+- 1.88); >motion findings: free-breathing -> significantly larger motion than breath-hold	DBM-driven segmentation accurately tracks heart motion on cine MRI and outperforms exsiting level-set methods; useful for RT cardiac motion assessment		Troy
Automatic quantification of calcifications in the coronary arteries and thoracic aorta on radiotherapy planning CT scans of Western and Asian breast cancer patients	Gernaat, SAM and van Velzen, SGM and Koh, V and Emaus, MJ and Isgum, I and Lessmann, N and Moes, S and Jacobson, A and Tan, PW and Grobbee, DE and van den Bongard, DHJ and Tang, JI and Verkooijen, HM	Radiotherapy and Oncology	2018	2289	Breast cancer	Deep Learning (convolutional neural network (CNN))	RT planning computed tomographic (CT) scans	Quantified calcifications in coronary arteries (CAC) and thoracic aorta (TAC)	CVD risk categories were based on Agatson CAC: 0, 1–10, 11–100, 101–400 and >400.	assessed its reproducibility compared to manual scoring. total test set included 240 CT scans.	Imaging/Calcification	Reliability of CAC categories and TAC was excellent	Deep learning is a reliable method to automatically measure CAC and TAC on radiotherapy breast CT scans.
Bragatston study protocol: a multicentre cohort study on automated quantification of cardiovascular calcifications on radiotherapy planning CT scans for cardiovascular risk prediction in patients with breast cancer.	Emaus MJ and Išgum I and van Velzen SGM and van den Bongard HJGD and Gernaat SAM and Lessmann N and Sattler MGA and Teske AJ and Penninkhof J and Meijer H and Pignol JP and Verkooijen HM	BMJ Open	2019	16000	Breast cancer	Deep Learning	Automatically measured coronary, aortic, and valvular calcifications on RT planning CT; traditional CVD risk factors; treatment characteristics	Incident fatal and non-fatal CVD events	Clinical CVD diagnoses during follow-up (registry/medical record–based)	Step 1: Optimize + validate deep learning algorithm for CAC/vascular valve/aortic calcium quantification on planning CT; Step 2: Multicentre cohort analysis + case-cohort evaluation of predictive value over standard risk factors	Imaging/Calcification	N/A (protocol paper)	Protocol aims to determine whether automated cardiovascular calcification measurements on routine RT planning CT scans can improve CVD risk prediction in breast cancer patients before potentially cardiotoxic therapy.	Utilizes non–ECG-gated RT planning CT (opportunistic screening); registered trial NCT03206333.
Cardiac substructure segmentation with deep learning for improved cardiac sparing.	Morris ED and Ghanem AI and Dong M and Pantelic MV and Walker EM and Glide-Hurst CK	Medical Physics	2020	32	Breast cancer	Deep Learning	Cardiac substructure volumes (12 substructures: chambers, great vessels, coronary arteries, pulmonary veins), Dice similarity coefficient (DSC), mean distance to agreement (MDA), consensus clinical scores	Accuracy of cardiac substructure segmentation; clinical acceptance	Not assessed; study focused on segmentation for cardiac sparing in radiation therapy planning	11 test CTs (7 unique patients); compared to ground truth from MR/CT registration and multi-atlas method; physician consensus evaluation (5-point scale)	Imaging/Segmentation	DL achieved DSC: chambers 0.88 ± 0.03, great vessels 0.85 ± 0.03, pulmonary veins 0.77 ± 0.04, coronary arteries 0.50 ± 0.14; MDA <2 mm; no significant volume differences vs ground truth; superior to multi-atlas in left main coronary artery delineation; DL contouring ~14 s per patient	Deep learning enables rapid, accurate segmentation of cardiac substructures, improving efficiency and potentially facilitating cardiac-sparing radiotherapy.	Demonstrates integration of MRI soft tissue contrast with CT for single-CT-based DL segmentation; clinically relevant for radiation oncology workflow.
Deep Learning for Automatic Calcium Scoring in CT: Validation Using Multiple Cardiac CT and Chest CT Protocols.	van Velzen SGM and Lessmann N and Velthuis BK and Bank IEM and van den Bongard DHJG and Leiner T and de Jong PA and Veldhuis WB and Correa A and Terry JG and Carr JJ and Viergever MA and Verkooijen HM and Išgum I	Radiology	2020	7240	Unspecific	Deep Learning (convolutional neural network (CNN))	Non-contrast CT images (CAC scoring CT, chest CT, PET attenuation CT, RT planning CT, low-dose chest CT), manual Agatston CAC and TAC scores	Coronary artery calcium (CAC) and thoracic aorta calcium (TAC) quantification; cardiovascular disease risk category	Coronary and thoracic calcium scores as surrogate markers of cardiovascular risk	Compared DL scores to manual Agatston scores across multiple CT protocols; intraclass correlation coefficients (ICC) and κ statistics for CVD risk categories	Imaging/Calcification	Baseline ICCs 0.79-0.97 (CAC) and 0.66-0.98 (TAC); protocol-specific training improved ICCs to 0.84-0.99 (CAC) and 0.92-0.99 (TAC); combined training ICCs 0.85-0.99 (CAC) and 0.96-0.99 (TAC); κ for CVD risk category 0.90 baseline, 0.92 with protocol-specific/combined training	DL calcium scoring is robust across multiple CT protocols; performance improves with protocol-specific training, enabling reliable CVD risk stratification from diverse CT exams	Applicable to RT planning CT scans; provides automated, reproducible cardiovascular risk markers without additional imaging.
Development and application of an elastic net logistic regression model to investigate the impact of cardiac substructure dose on radiation-induced pericardial effusion in patients with NSCLC	Niedzielski, JS and Wei, X and Xu, T and Gomez, DR and Liao, ZX and Bankson, JA and Lai, SPY and Court, LE and Yang, JZ	Acta Oncologica	2020	141	Lung cancer	Regression model	Dose-volume histogram (DVH) metrics for whole heart and substructures (mean, max dose, V5Gy–V70Gy); pericardial effusion grade ≥2 (CTCAE v4.0)	Radiation-induced pericardial effusion (PCE)	Pericardial effusion ≥ grade 2 as a surrogate for cardiac toxicity	100-iteration cross-validation (75% training / 25% test split); final model fitted on entire cohort for external comparison	Prediction/Dosiomics	Models including substructure dose outperformed whole-heart only models (median AUC 0.820 vs 0.799; accuracy 0.743 vs 0.713); final model achieved AUC 0.879, accuracy 0.801	Including cardiac substructure dose metrics improves prediction of radiation-induced pericardial effusion in NSCLC patients; elastic net regression is effective for this toxicity modeling	Provides a framework for future external validation and potential clinical application in RT planning to minimize cardiac toxicity.
Effect of Radiation Doses to the Heart on Survival for Stereotactic Ablative Radiotherapy for Early-stage Non-Small-cell Lung Cancer: An Artificial Neural Network Approach	Chan, ST and Ruan, D and Shaverdian, N and Raghavan, G and Cao, M and Lee, P	Clinical Lung Cancer	2020	153	Lung cancer	Neural Network	Cardiac radiation doses (maximum dose, mean dose, V-10Gy, V-25Gy, V-50Gy) to 15 cardiac substructures and whole heart; 74 input features in ANN	Overall survival	Cardiac dosimetry substructures (e.g., right ventricle V-10Gy) associated with survival; surrogate for radiation-induced cardiac toxicity	ANN test set accuracy 64.7%; repeat ANN with dose-neutral structures confirmed predictive power	Prediction/Dosiomics	RV V-10Gy <4% associated with longer OS (5.3 vs 2.4 years); ANN model predicted survival with 64.7% accuracy	Higher radiation doses to cardiac substructures are associated with decreased OS in early-stage NSCLC treated with SABR; minimizing cardiac dose and cardiac follow-up is recommended	Retrospective study; relatively small cohort; highlights importance of heart as organ-at-risk in SABR; uses ANN to handle multiple dosimetric variables
Evaluation of a delineation software for cardiac atlas-based autosegmentation: An example of the use of artificial intelligence in modern radiotherapy	Loap, P and Tkatchenko, N and Kirova, Y	Cancer Radiothérapie	2020	40	Breast cancer	Deep Learning	Cardiac substructure contours (whole heart, chambers, left ventricle walls); comparison of manual vs automated segmentation	Accuracy of autosegmentation assessed by Dice similarity coefficient (DSC)	Indirect — improved delineation of cardiac structures to minimize radiation exposure and potential cardiac toxicity	Validation on 20 independent CT scans; compared automated contours with manual contours by radiation oncologist	Imaging/Segmentation	DSC 0.95 for whole heart, 0.80 for chambers, 0.50 average for LV walls (0.34–0.70 range); coronary artery segmentation unsuccessful; overall comparable to other published methods	Cardiac atlas-based autosegmentation using Mirada software shows acceptable performance for cardiac cavity delineation, but further improvements needed for reliable clinical use	Focused on segmentation accuracy, not direct patient outcomes; retrospective; highlights AI’s role in enhancing radiotherapy planning
Incorporating sensitive cardiac substructure sparing into radiation therapy planning.	Morris ED and Aldridge K and Ghanem AI and Zhu S and Glide-Hurst CK	Journal of Applied Clinical Medical Physics	2020	16	Thoracic Cancers	Deep Learning (U-Net)	13 cardiac substructures; mean and maximum doses; LV-V5; plan complexity (MU, treatment time)	Dose reduction to cardiac substructures; impact on PTV coverage and other OARs; plan complexity	Indirect, via dosimetric reductions in cardiac substructures (predictive of lower cardiotoxicity risk)	Contours revised by radiation oncologists; plans re-optimized; evaluated for dosimetric improvement	Imaging/Segmentation	Mean heart dose reduced (0.7 ± 0.6 Gy); LADA mean and D0.03cc reduced; LV D0.03cc reduced >1.5 Gy in 10 patients; LV-V5 reduced >7% in 6 patients; left atrial and left main coronary artery doses reduced; no significant increase in treatment time or MU; some patients benefited from new beam arrangements	Integration of MRI with deep learning contouring allows improved cardiac substructure sparing in radiotherapy planning without increasing plan complexity; potential to reduce radiation-related cardiotoxicity	Small cohort; primarily planning/dosimetric study; demonstrates feasibility of combining MR-linac imaging with AI contouring
Machine Learning-Based Risk Assessment for Cancer Therapy-Related Cardiac Dysfunction in 4300 Longitudinal Oncology Patients.	Zhou Y and Hou Y and Hussain M and Brown SA and Budd T and Tang WHW and Abraham J and Xu B and Shah C and Moudgil R and Popovic Z and Cho L and Kanj M and Watson C and Griffin B and Chung MK and Kapadia S and Svensson L and Collier P and Cheng F	Journal of the American Heart Association	2020	4309	Multiple cancers	Classification models: (k-nearest neighbors, LR, SVM, RF, and GB)	Clinical variables including age, hypertension, glucose levels, left ventricular ejection fraction, creatinine, aspartate aminotransferase, laboratory tests, echocardiographic measurements	Cancer therapy–related cardiac dysfunction (CTRCD): 6 cardiovascular outcomes: coronary artery disease, atrial fibrillation, heart failure, stroke, myocardial infarction, and de novo CTRCD	Clinical diagnosis via laboratory and echocardiographic parameters; occurrence of CTRCD before, during, or after cancer therapy	Model performance assessed via AUROC; generalizability confirmed with time-split data	Prediction	AUROC values: coronary artery disease 0.821, atrial fibrillation 0.787, heart failure 0.882, stroke 0.660, myocardial infarction 0.807, de novo CTRCD 0.802	ML can stratify cardiac risk in oncology patients using longitudinal clinical and lab data, enabling early detection and prevention of therapy-related cardiac dysfunction	Highlights clinically relevant predictors of CTRCD; emphasizes large-scale real-world data applicability
The benefits evaluation of abdominal deep inspiration breath hold based on knowledge-based radiotherapy treatment planning for left-sided breast cancer	Xu, JQ and Wang, JZ and Zhao, F and Hu, WG and Yao, GR and Lu, ZJ and Yan, SX	Journal of Applied Clinical Medical Physics	2020	40	Breast cancer	Knowledge-based planning (KPB) using kernel density estimation (KDE) DVH prediction models	Geometric relationship features + prior high-quality IMRT plans; breathing condition (Free breathing vs abdominal DIBH), structures include PTV and OARs (heart, LADCA, left lung).	DVHs for OARs and corresponding auto-optimized KDE plans generated from those DVHs	Not applicable	Internal validation / DVH accuracy + ability to generate deliverable plans / pre-planning decision suport only	Prediction/Dosiomics	KDE DVH prediction was accurate and usable only when the model matched the breathing condition (e.g. FB -> FB, DIBH -> DIBH). Using mismatched breathing models led to significantly worse DVH predictions and/or non-deliverable optimization targets.	KDE-based KBP can predict DVHs and generate clinically comparable plans when trained/applied within the same breathing condition, but performance degrades across breathing conditions		Joe
Artificial Intelligence-Assisted Prediction of Late-Onset Cardiomyopathy Among Childhood Cancer Survivors.	Güntürkün F and Akbilgic O and Davis RL and Armstrong GT and Howell RM and Jefferies JL and Ness KK and Karabayir I and Lucas JT Jr and Srivastava DK and Hudson MM and Robison LL and Soliman EZ and Mulrooney DA	JCO Clinical Cancer Informatics	2021	1217	Childhood Cancer	Machine Learning and Deep Learning (Extreme Gradient Boosting [XGBoost], Convolutional Neural Networks [CNN], and Genetic Algorithms for feature selection)	Clinical data and ECG	Cardiomyopathy after RT	Cardiomyopathy was defined as an ejection fraction , 50% or an absolute drop from the baseline ≥ 10% obtained by echocardiogram during any of the follow-up visits.	Evaluated via five-fold stratified cross-validation	Prediction	artery locations ranged from 0.80 to 0.91. R2 values of dosimetric parameters were 0.77 to 1.00 for the cardiac chambers and	AI using ECG data can assist in the early identification of childhood cancer survivors at increased risk for future cardiomyopathy, potentially enabling earlier intervention	9.6% of patients developed cardiomyopathy during a median follow-up of 5.2 years ; the model had a negative predictive value of 97%	Wes
Automatic delineation of cardiac substructures using a region-based fully convolutional network.	Harms J and Lei Y and Tian S and McCall NS and Higgins KA and Bradley JD and Curran WJ and Liu T and Yang X	Medical Physics	2021	55	Lung cancer	Deep Learning (convolutional neural network (CNN))	Computed Tomography (CT) scans (33 with contrast, 22 without contrast)	Automatic generation of contours for the whole heart and 15 cardiac substructures	N/A (The model aims to facilitate studies on the relationship between radiation dose to these structures and treatment toxicities)	Evaluated using threefold cross-validation on 45 datasets and a separate holdout cohort of 10 patients	Imaging/Segmentation	* High accuracy: Achieved average Dice score coefficients (DSCs) of 0.96 for the whole heart, 0.94 for chambers, and 0.93 for great vessels. * Efficiency: New datasets can be segmented in less than 5 seconds after training. * Contrast impact: Performed significantly better on chambers and the whole heart when contrast was present.	The deep learning network successfully automates the delineation of cardiac substructures from CT alone, providing a tool to better understand and potentially mitigate radiation-induced cardiac toxicities.	The 15 substructures include the atria, ventricles, coronary arteries (LADA, LCFLX, LMCA, RCA), great vessels (AA, PA, SVC), and heart valves (AV, MV, PV, TV).	Wes
Deep learning model for automatic contouring of cardiovascular substructures on radiotherapy planning CT images: Dosimetric validation and reader study based clinical acceptability testing.	Garrett Fernandes M and Bussink J and Stam B and Wijsman R and Schinagl DAX and Monshouwer R and Teuwen J	Radiotherapy and Oncology	2021	177	Lung cancer	Neural network	Planning CT images (contrast and non-contrast), expert contours of heart, cardiac chambers, and great vessels	Geometric contour accuracy, dosimetric parameter estimation, clinical acceptability	N/A — focuses on accurate contouring for dosimetric evaluation rather than clinical events	Geometric and dosimetric validation on independent CT scans; clinical acceptability tested by three radiation oncologists on RTOG-0617 scans	Imaging/Segmentation	Median surface dice at 3 mm tolerance 90%; median absolute difference in mean dose 0.45 Gy; mean clinical acceptability rate 91%	The model provides accurate, consistent, and time-efficient contours of cardiac substructures on RT planning CTs; suitable for large datasets and clinical use	Supports dosimetric analysis for cardiac radiotoxicity research and can save time in clinical contouring workflows.
Deep-learning system to improve the quality and efficiency of volumetric heart segmentation for breast cancer	Zeleznik, R and Weiss, J and Taron, J and Guthier, C and Bitterman, DS and Hancox, C and Kann, BH and Kim, DW and Punglia, RS and Bredfeldt, J and Foldyna, B and Eslami, P and Lu, MC and Hoffmann, U and Mak, R and Aerts, HJWL	NPJ Digital Medicine	2021	6535	Breast cancer	Deep Learning	CT scans, manual heart segmentations, segmentation time, inter-expert agreement, Dice similarity coefficient (DSC)	DSC, segmentation time, concordance, failure rate (<0.85 Dice)	N/A — focus on accurate heart segmentation for radiation planning	Independent dataset of 5677 patients; 20-patient subset compared with 8 radiation oncology experts; real-world clinical contours compared for concordance and failure rates	Imaging/Segmentation	Segmentation time reduced from 4.0 to 2.0 min with DL assistance; expert agreement increased (Dice 0.95 → 0.97); accuracy maintained (Dice ~0.92); high concordance with real-world contours (Dice 0.89); significantly lower failure rate (p < 0.001)	Deep-learning volumetric heart segmentation improves efficiency, consistency, and reliability for RT planning in breast cancer; system applicable across medical specialties without retraining	Demonstrates cross-disciplinary utility of AI; potential to reduce manual workload and standardize heart contouring in large-scale clinical practice.
Identification of Risk of Cardiovascular Disease by Automatic Quantification of Coronary Artery Calcifications on Radiotherapy Planning CT Scans in Patients With Breast Cancer.	Gal R and van Velzen SGM and Hooning MJ and Emaus MJ and van der Leij F and Gregorowitsch ML and Blezer ELA and Gernaat SAM and Lessmann N and Sattler MGA and Leiner T and de Jong PA and Teske AJ and Verloop J and Penninkhof JJ and Vaartjes I and Meijer H and van Tol-Geerdink JJ and Pignol JP and van den Bongard DHJG and Išgum I and Verkooijen HM	JAMA Oncology	2021	15915	Breast cancer	Deep Learning	CAC scores from planning CT scans (Agatston risk categories: 0, 1-10, 11-100, 101-399, >400), treatment factors, age, calendar year	Cardiovascular disease (CVD) and coronary artery disease (CAD) incidence	Extracted from national registries; linked to CAC scores	Large-scale cohort with follow-up median 51.2 months; hazard ratios adjusted for age, treatment, and calendar year	Imaging/Calcification	CVD risk increased with higher CAC score (HR CAC>400 = 3.4); CAD risk particularly high (HR CAC>400 = 7.8); strongest association in patients treated with anthracyclines or a radiation boost	Automated CAC quantification on radiotherapy planning CT is associated with increased CVD/CAD risk in breast cancer patients and can help identify high-risk individuals for preventive strategies	Very large cohort; demonstrates clinical utility of AI-assisted imaging for cardiovascular risk stratification in oncology patients
AI-Based Quantification of Planned Radiation Therapy Dose to Cardiac Structures and Coronary Arteries in Patients With Breast Cancer	van Velzen, SGM and Bruns, S and Wolterink, JM and Leiner, T and Viergever, MA and Verkooijen, HM and Isgum, I	International Journal of Radiation Oncology Biology Physics	2022	31	Breast cancer	Convolutional neural networks (CNNs)	planning CTs, auto-segmented cardiac chambers, artery localizations, dose maps. The input of the CNNs consists of slabs, consisting of 5 stacked axial image slices of 256 x 256 voxels.	1. segmentation of the cardiac chambers and large arteries, 2. localization of coronary arteries. 3. Dosimetric parameters analysis	using reference annotations and virtual noncontrast cardiac scans.	Automatic segmentations and artery trajectory locations were compared with the manual reference. Dice score (DSC) and average symmetrical surface distance (ASSD).	Imaging/Dosiomics	For cardiac chambers and large arteries, median DSC was 0.76 to 0.88, and the median ASSD was 0.17 to 0.27 cm in 2D slice evaluation. 3D evaluation found a DSC of 0.87 to 0.93 and an ASSD of 0.07 to 0.10 cm. Median DSC of the coronary artery locations ranged from 0.80 to 0.91. R2 values of dosimetric parameters were 0.77 to 1.00 for the cardiac chambers and large vessels, and 0.76 to 0.95 for the…	CNN can automatically obtain accurate estimates of planned radiation dose and dosimetric parameters for the cardiac chambers, large arteries, and coronary arteries.		Troy
AI-Based Radiation Dose Quantification for Estimation of Heart Disease Risk in Breast Cancer Survivors After Radiation Therapy	van Velzen, SGM and Gal, R and Teske, AJ and van der Leij, F and van den Bongard, DHJG and Viergever, MA and Verkooijen, HM and Isgum, I	International Journal of Radiation Oncology Biology Physics	2022	5300	Breast cancer	Deep Learning (CNN) for autosegmentation and Linear regression for prediction.	RT planning computed tomographic (CT) scans	1. Image autosegmentation of cardiovascular structures and coronary calcium scores (CAC) detection. 2. Dose volume parameters extraction. 3.hospitalization for or death from ischemic HD	the International Classification of Disease, 10th revision (ICD-10) codes I20-25 (eg, myocardial infarction and angina pectoris).	N/A	Imaging/Dosiomics	The absolute increase in HD risk was substantially higher in patients with CAC. No interaction between CAC and radiation dose was found.	Radiation exposure of cardiac structures is associated with increased risk of HD. Automatic segmentation of cardiac structures enables spatially localized dose estimation, which can prevent RT−induced cardiac damage.
Automated coronary artery calcium scoring in patients with breast cancer to assess the risk of heart disease following adjuvant radiation therapy.	Kim K and Chung SY and Oh C and Cho I and Kim KH and Byun HK and Yoon HI and Oh J and Chang JS	The Breast	2022	24000	Breast cancer	Deep learning	Coronary Artery Calcium (CAC) scores derived from radiotherapy planning CT scans (T-scores) and dedicated cardiac CT scans (C-scores)	Accuracy of the automated CAC scoring method (T-scores) compared to the gold standard (C-scores)	N/A (The focus is on the accuracy of the CAC score as a risk factor, not the CVD event itself)	A deep learning algorithm was developed and trained to automatically score CAC (T-score) on low-dose breast radiotherapy planning CT scans. The results were validated against C-scores from dedicated cardiac CT scans.	Imaging/Calcification	The algorithm achieved high classification accuracy (95% CI $0.85-0.95$). * There was excellent correlation between the automated T-scores and the C-scores (Spearman correlation coefficient $\rho=0.91$). * High inter-observer agreement was achieved (Kappa $\kappa=0.88$).	The automated deep learning method accurately measures CAC on low-dose breast radiotherapy planning CT scans, validating its use for risk stratification in large cohorts and for future individualized treatment planning.	The method uses CT scans that are routinely performed for breast radiotherapy planning. The study involved a large cohort of 24,000 patients.	Wes
Automatic Cardiac Structure Contouring for Small Datasets with Cascaded Deep Learning Models.	van den Oever LB and Spoor DS and Crijns APG and Vliegenthart R and Oudkerk M and Veldhuis RNJ and de Bock GH and van Ooijen PMA	Journal of Medical Systems	2022	24	Breast cancer	Deep Learning	CT scans (used for training and testing the cascaded deep learning model)	Accuracy and efficiency of automated contouring for 8 cardiac structures and the lungs	N/A (Focus is on contouring accuracy, not CVD outcome)	The cascaded deep learning model was trained on 14 patients and tested on 10 patients to evaluate its performance compared to manual contours.	Imaging/Segmentation	The mean Dice Similarity Coefficient (DSC) for the 8 cardiac structures was $0.80 \pm 0.05$. * The DSC for the lungs was $0.98 \pm 0.01$. * The mean contouring time was significantly reduced to 6.7 seconds using the automated method.	The proposed cascaded deep learning models can automatically contour key cardiac structures with clinically acceptable accuracy and significantly high efficiency on small datasets, which is essential for improving cardiac dose constraint evaluation in radiotherapy.	The model was designed specifically to handle small datasets, and it successfully contoured 8 cardiac structures (including the left ventricle, right atrium, etc.) and the lungs.	Wes
Development of deep learning chest X-ray model for cardiac dose prediction in left-sided breast cancer radiotherapy	Koide, Y and Aoyama, T and Shimizu, H and Kitagawa, T and Miyauchi, R and Tachibana, H and Kodaira, T	Scientific Reports	2022	103	Breast cancer	Convolutional neural network (CNN). + regression model	Anteroposterior and lateral chest X-rays; radiotherapy planning parameters (free-breathing vs. DIBH mean heart dose)	Increment in mean heart dose (MHD) reduction with DIBH; binary classification of patients with increment MHD >1 Gy	Predicted cardiac dose exposure (mean heart dose)	Binary classification performance in test cohort; ROC-AUC, sensitivity, specificity, PPV, NPV, diagnostic accuracy	Prediction	Sensitivity 85.7%, specificity 90.9%, PPV 92.3%, NPV 83.3%, diagnostic accuracy 88%, ROC-AUC 0.864	Deep learning chest X-ray model can predict patients likely to benefit from DIBH radiotherapy for reduced cardiac dose; may assist in individualized treatment planning	Enables pre-selection of patients for breath-hold techniques, potentially minimizing radiation-induced cardiac exposure.
Dosimetric Planning Tradeoffs to Reduce Heart Dose Using Machine Learning-Guided Decision Support Software in Patients with Lung Cancer	Bitterman, DS and Selesnick, P and Bredfeldt, J and Williams, CL and Guthier, C and Huynh, E and Kozono, DE and Lewis, JH and Cormack, RA and Carpenter, CM and Mak, RH and Atkins, KM	International Journal of Radiation Oncology Biology Physics	2022	353	Lung cancer	machine learning-guided clinical decision support software (Classification models: Boosting framework, decision trees and regression learning)	RT plan characteristics, lung dose metrics (V20 Gy, V5 Gy, MLD), mean heart dose (MHD)	Potential reduction in MHD and associated lung dose tradeoffs	Focused on predicted heart dose as a surrogate for cardiac toxicity	Leave-one-out predictive model; comparison of conventional RT vs. IMRT plans	Prediction/Dosiomics	39% of plans predicted MHD reductions >4–8 Gy without violating lung constraints; switching to IMRT improved MHD in 73% of patients with average 2.0 Gy reduction; mean ≥3.7 Gy MHD reduction associated with small increases in lung V20, V5, and MLD	Machine learning-guided decision support can identify RT plans that reduce heart dose with clinically acceptable lung dose tradeoffs, supporting optimization of RT planning for NSCLC	Demonstrates feasibility of AI in guiding dosimetric planning and identifying patients benefiting most from advanced RT techniques.
Elevated Coronary Artery Calcium Quantified by a Validated Deep Learning Model From Lung Cancer Radiotherapy Planning Scans Predicts Mortality	Atkins, KM and Weiss, J and Zeleznik, R and Bitterman, DS and Chaunzwa, TL and Huynh, E and Guthier, C and Kozono, DE and Lewis, JH and Tamarappoo, BK and Nohria, A and Hoffmann, U and Aerts, HJWL and Mak, RH	JCO Clinical Cancer Informatics	2022	428	Lung cancer	Deep Learning	Coronary artery calcium (CAC) volume from RT planning CT; lung cancer and cardiovascular covariates	All-cause mortality; major adverse cardiac events (MACEs)	Elevated CAC as a surrogate for atherosclerotic cardiovascular disease	Model previously validated on four clinical trial cohorts; applied to radiotherapy planning CTs	Imaging/Calcification	DL-CAC ≥1 in 61.4% of patients; associated with higher all-cause mortality (adjusted HR 1.51, P=0.04); 2-year mortality 56.2% vs 45.4%; trend toward higher MACEs (HR 1.80, P=0.11)	Automated deep learning can quantify CAC from routine RT planning CTs; elevated CAC predicts increased mortality; supports potential use for cardiac risk screening before cancer therapy	Proof-of-concept study; trend for MACEs did not reach statistical significance; retrospective
Enhanced cardiac substructure sparing through knowledge-based treatment planning for non-small cell lung cancer radiotherapy	Momin, S and Wolf, J and Roper, J and Lei, Y and Liu, T and Bradley, JD and Higgins, K and Yang, XF and Zhang, JH	Frontiers in Oncology	2022	55	Lung cancer	AI based Knowledge-based planning (KBP) model (RapidPlan: ML and DL KBP))	Cardiac substructure doses (15 substructures including coronary arteries, valves, great vessels, chambers); PTV coverage; other organ-at-risk doses	Cardiac substructure dose sparing (e.g., V15Gy for LAD artery), overall plan quality	Indirect — focused on reducing post-radiotherapy cardiac doses to minimize potential cardiac toxicity	CS-KBP model tested on 28 additional patients; compared to manually optimized and C-KBP plans	Prediction/Dosiomics	CS-KBP significantly improved sparing of cardiac substructures without compromising PTV coverage or exceeding other OAR tolerances; e.g., LAD V15Gy 0.69 cc vs 1.23 cc (clinical) and 1.05 cc (C-KBP), p<0.01	Knowledge-based planning with detailed cardiac substructures (CS-KBP) can significantly improve cardiac dose sparing in NSCLC radiotherapy while maintaining treatment quality	Retrospective dosimetric study; no direct clinical outcomes reported; proof-of-concept for advanced AI-assisted treatment planning
Implementation of a Commercial Deep Learning-Based Auto Segmentation Software in Radiotherapy: Evaluation of Effectiveness and Impact on Workflow	Radici, L and Ferrario, S and Borca, VC and Cante, D and Paolini, M and Piva, C and Baratto, L and Franco, P and La Porta, MR	Life-Basel	2022	Not specified	Multiple cancers	Deep Learning (U-Net)	Organs-at-risk and target volume delineation; geometric performance (volume variation, Dice Similarity Coefficient, center of mass shift); dosimetric differences; contouring time	Accuracy of auto-segmentation vs manual; time savings; dosimetric impact	Not applicable	Compared manual vs automatic segmentation on specific disease sites; assessed workflow efficiency and dosimetric differences	Imaging/Segmentation	Maximum time reduction 65% (head and neck); average DSC 0.72; best agreement for lungs; good results for bladder, heart, femoral heads; dosimetric difference noted for rectal cancer	Deep learning auto-segmentation significantly reduces contouring time, simplifies workflow, reduces interobserver variability, and can improve radiotherapy planning efficiency	Focus on software implementation and workflow improvement rather than patient outcomes
Mutual enhancing learning-based automatic segmentation of CT cardiac substructure.	Momin S and Lei Y and McCall NS and Zhang J and Roper J and Harms J and Tian S and Lloyd MS and Liu T and Bradley JD and Higgins K and Yang X	Physics in Medicine and Biology	2022	120	Thoracic Cancers	Deep Learning	CT images, manually contoured cardiac substructures, network-derived feature maps	Automatic segmentation of up to 15 cardiac substructures (chambers, coronary arteries, great vessels, valves)	Not directly assessed; focus on anatomical segmentation to support cardiotoxicity risk evaluation	Evaluated on three datasets (institutional, MM-WHS, ACDC) using five-fold cross-validation, hold-out testing, and comparison to 3D U-net, Mask R-CNN, Mask Scoring R-CNN, and ablated network	Imaging/Segmentation	Significantly improved segmentation accuracy for small substructures (e.g., CA-LADA, CA-RCA), comparable accuracy for large substructures, faster and more precise segmentation to support clinical workflow	Mutual enhancing DL strategy can accurately segment small and large cardiac substructures, facilitating radiotherapy planning and potential reduction of cardiotoxicity through precise dose mapping	Focused on improving clinical workflow and enabling rapid physician review; primarily a technical/segmentation advance rather than direct clinical outcome study
RootPainter3D: Interactive-machine-learning enables rapid and accurate contouring for radiotherapy	Smith, AG and Petersen, J and Terrones-Campos, C and Berthelsen, AK and Forbes, NJ and Darkner, S and Specht, L and Vogelius, IR	Medical Physics	2022	933	Thoracic Cancers	Deep learning (U-Net)	CT images; clinician-provided contour edits; pixel/voxel labels updated iteratively during training	Automatically generated OAR contours that improve in accuracy over time with user corrections	Not applicable	Dice similarity; time-to-contour measured as more images were annotated	Imaging/Segmentation	High agreement with expert contours (Dice ~0.95 for heart); contouring time reduced (~2 min vs ~7 min manual after sufficient training	Interactive ML can produce accurate RT contours while continously improving from clinician input		Joe
Synthetic contrast-enhanced computed tomography generation using a deep convolutional neural network for cardiac substructure delineation in breast cancer radiation therapy: a feasibility study.	Chun J and Chang JS and Oh C and Park I and Choi MS and Hong CS and Kim H and Yang G and Moon JY and Chung SY and Suh YJ and Kim JS	Radiation Oncology	2022	59	Breast cancer	Deep Learning	Non-contrast CT (NCT). Cardiac substructure contours (heart, LA/LV/RA/RV, LAD, RCA). DVH metrics from plans (Dmean, Dmax, V5/V10/V20/V30/V40)	Synthetic contrast enhanced CT images (SCECT), manual cardiac substructure contours on SCECT and dosimetric agreement vs contours on true CECT	Not applicable	3 stage validation: 1. SCECT vs CECT image similarity (MAE/PSNR/SSIM) 2. Same physician manually contoured heart substructures on SCECT and CECT (1 month separation) (compared using DSC/MSD 3. Dosimetry check: DVH metric differences when using SCECT-based vs CECT based contours. Application: Provide pseudocontrast detail to make cardiac substructure delineation more feasible on datasets where onl…	Imaging/Segmentation	Image similarity improved vs NCT => Mean absolute error of SCECT-CECT: 20.66 +/- 5.29 Mean absolute error of NCT-CECT: 23.95 +/- 6.98 PSNR of SCECT-CECT: 21.57 ± 1.85 PSNR of NCT-CECT: 20.67 ± 2.34 SSIM of SCECT-CECT: 0.77 ± 0.06 SSIM of NCT-CECT: 0.76 ± 0.07 DSC SCECT vs CECT: 0.81 ± 0.06 MSD SCECT vs CECT: and 2.44 ± 0.72 Mean heart dose difference about 0.12 ± 0.27 Gy and heart V5Gy differeenc…	DL-generated synthetic contrast CT from NCT is feasible and shows potential utility for cardiac substructure delineation	Of the 59 patients 35, 4, and 20 pairs of NCT/CECT were used for training, validation, and testing, respectively	Joe
Validation of an established deep learning auto-segmentation tool for cardiac substructures in 4D radiotherapy planning scans	Walls, GM and Giacometti, V and Apte, A and Thor, M and McCann, C and Hanna, GG and 'Connor, J and Deasy, JO and Hounsell, AR and Butterworth, KT and Cole, AJ and Jain, S and McGarry, CK	Physics and Imaging in Radiation Oncology	2022	20	Lung cancer	Deep Learning	3D-CT scans or 4D-AVE CT scans of the thorax	segmented cardiac substructures (RA, LA, RV, LV, AO, PA, SVC, IVC, whole heart, pericardium)	segmented structures used to extract dosimetric information that serve as surrogate markers for potential cardiac toxicity	pre-trained on 240 3D-CT lung cancer plans and tested on an independent set of 20 4D-AVE scans Model performance was evaluated using geometric metrics (DSC, Hausdorff distance), dosimetric metrics (mean dose, Dmax), and qualitative clinical assessment by senior clinicians	Imaging/Segmentation	DSC 0.85, median volume difference 11.8%, centroid shift 3–4 mm, HD95 median 7.1 mm. Mean and maximum dose differences were small (median 0.2 Gy and 0.4 Gy). 99.5% of structures deemed clinically acceptable. RV and LV had the lowest dose differences.	Deep learning-based auto-segmentation can accurately delineate cardiac substructures and predict dosimetry on 4D-CT scans in lung cancer radiotherapy	Automated cardiac substructure segmentation on 4D-AVE scans showed high geometric and dosimetric accuracy.	Peyton
Acute coronary event (ACE) prediction following breast radiotherapy by features extracted from 3D CT, dose, and cardiac structures	Choi, BS and Yoo, SK and Moon, J and Chung, SY and Oh, J and Baek, S and Kim, Y and Chang, JS and Kim, H and Kim, JS	Medical Physics	2023	84	Breast cancer	Deep learning for auto-segmentation and logistic regression	planning CT, dose distribution, auto-segmented cardiac structure (LV, LAD, RCA), extracted imaging features and actived regions	Acute coronary events (ACE)	Clinically adjudicated ACE defined as MI, ischemic heart dz, coronary revascularization, cardiac death	1. 4-fold cross-validation; 2. independent test set performance; 3. compred to radiomics; 4. Grad-CAM heatmaps to interpret substructure contribution	Imaging/Features; Prediction of RT-related cardiac events using CT + dose + substructure features	1. cross-validation: accuracy: 0.96, AUC: 0.94; 2. independent test performance: accuracy: 0.83, AUC: 0.83; 3. features around LV were most preductive of ACE; 4. combined imaging + dose + substructure features outperformed pure radiomics models or generic deep neural networks	1. integreating CT, dose data, cardiac substructure features using DL framework can accurately predict ACE, following breast RT; 2. substructure features, particularly LV, are critical for ACE risk modeling, supporting personalzied risk stratification in breast RT patients		Troy
Artificial Intelligence-Based Patient Selection for Deep Inspiration Breath-Hold Breast Radiotherapy from Respiratory Signals	Vendrame, A and Cappelletto, C and Chiovati, P and Vinante, L and Parvej, M and Caroli, A and Pirrone, G and Barresi, L and Drigo, A and Avanzo, M	Applied Sciences	2023	36	Breast cancer	Recurrent neural networks (RNN): Deep Bidirectional Long Short-Term Memory (BLSTM)	Respiratory signals/waveforms acquired during pre-treatment CT (superior-inferior and anterior-posterior directions)	Eligibility for Deep Inspiration Breath-Hold (DIBH) radiotherapy	Based on the decrease of maximum dose to the left anterior descending (LAD) artery achieved with DIBH compared to free-breathing (FB)	Dataset split into training (60%) and test (40%) groups; performance evaluated on the test set	Patient Selection	large vessels, and 0.76 to 0.95 for the coronary arteries.	The proposed BLSTM-RNN can classify patients eligible for DIBH with good accuracy from respiratory signals, offering a promising tool for building automated decision systems in radiotherapy	DIBH significantly increased the distance of the LAD from the target region (from 0.08 cm to 2.19 cm, $p \ll 0.001$), resulting in a substantial dose reduction	Wes
Association between statin therapy dose intensity and radiation cardiotoxicity in non-small cell lung cancer: Results from the NI-HEART study.	Walls GM and O'Connor J and Harbinson M and McCarron EP and Duane F and McCann C and McKavanagh P and Johnston DI and Erekkath J and Giacometti V and Gavin AT and McAleese J and Hounsell AR and Cole AJ and Butterworth KT and McGarry CK and Hanna GG and Jain S	Radiotherapy and Oncology	2023	291	Lung cancer	Deep learning	Statin therapy (high-intensity vs. low/moderate-intensity) 8and mean heart dose (MHD) of $\ge 5$ Gy	Occurrence of clinical cardiovascular events (CVEs), and cardiovascular structures autosegmentation	Determined by the treating physician or a cardiologist	To investigate if high-intensity statin therapy reduces radiation-induced cardiotoxicity in NSCLC patients	Imaging/Segmentation	Patients on statin therapy had a significantly lower 2-year Cumulative Incidence Function (CIF) of CVEs (3% vs. 15.6%, p=0.003)	Statin therapy significantly reduces the risk of radiation-induced cardiotoxicity in NSCLC patients14. High-intensity statin therapy further reduces the 2-year CIF of CVEs compared to low/moderate-intensity statin therapy, especially in patients receiving a mean heart dose (MHD) greater than or equal to 5 Gy	The study is the first analysis from the prospective observational NI-HEART study.	Wes
Association of cardiac calcium burden with overall survival after radiotherapy for non-small cell lung cancer	Haseltine, JM and Apte, A and Jackson, A and Yorke, E and Yu, AF and Plodkowski, A and Wu, A and Peleg, A and Al-Sadawi, M and Iocolano, M and Gelblum, D and Shaverdian, N and Simone , CB II and Rimner, A and Gomez, DR and Shepherd, AF and Thor, M	Physics and Imaging in Radiation Oncology	2023	239	Lung cancer	Deep learning	Cardiac Calcium Burden (CCB) score (quantified using the Agatston classification: $0$, $1-100$, $>100$ Agatston units) and clinical parameters	Overall Survival (OS)	N/A (The primary outcome was Overall Survival, with CCB as a prognostic factor)	To evaluate the prognostic value of pre-treatment CCB in NSCLC patients receiving radiotherapy	Imaging/Calcification	Median overall survival (OS) was significantly different for the three CCB groups: $34.6$ months (CCB 0), $18.5$ months (CCB $1-100$), and $15.5$ months (CCB $>100$). * In multivariate analysis, CCB was an independent predictor of OS (Hazard Ratio $1.51$, $95\%$ CI $1.16–1.97$, $p=0.002$).	Pre-treatment cardiac calcium burden, easily quantifiable on radiotherapy planning CT, is an independent prognostic factor for overall survival in NSCLC patients treated with radiotherapy.	The mean age of patients was 68 years.	Wes
Dosiomics-Based Prediction of Radiation-Induced Valvulopathy after Childhood Cancer	Chounta, S and Allodji, R and Vakalopoulou, M and Bentriou, M and Do, DT and De Vathaire, F and Diallo, I and Fresneau, B and Charrier, T and Zossou, V and Christodoulidis, S and Lemler, S and Le Chevalier, VL	Cancers	2023	7670	Childhood Cancer	Random forest algorithms	Heart-dose distribution, 93 first-order and spatial dosiomics features, mean heart dose (MHD)	Prediction of radiation-induced valvular heart disease (VHD)	Late-onset VHD after radiotherapy	Comparison of predictive performance between standard MHD-based models and dosiomics-based models; sensitivity analysis for patients with spatially heterogeneous heart doses	Prediction/Dosiomics	Overall, MHD and dosiomics-based models performed similarly; for patients with spatially heterogeneous heart doses, dosiomics features significantly improved predictive capability	Dosiomics signatures, capturing spatial characteristics of heart dose, can enhance prediction of radiation-induced VHD in childhood cancer survivors, particularly for heterogeneous dose distributions; may inform personalized follow-up and risk stratification	Highlights the value of incorporating spatial dose information into machine learning models beyond mean dose metrics for late cardiac toxicity prediction.
Explainable Artificial Intelligence to Identify Dosimetric Predictors of Toxicity in Patients with Locally Advanced Non-Small Cell Lung Cancer: A Secondary Analysis of RTOG 0617	Ladbury, C and Li, RC and Danesharasteh, A and Ertem, Z and Tam, A and Liu, JS and Hao, CR and Li, RS and McGee, H and Sampath, S and Williams, T and Glaser, S and Khasawneh, M and Liao, ZX and Lee, P and Ryckman, J and Shaikh, P and Amini, A	International Journal of Radiation Oncology Biology Physics	2023	544	Lung cancer	Multiple supervised ML classification models: logistic regression, naïve Bayes, k-nearest neighbors, support vector machine, random forest, and extreme gradient boosting (XGBoost); explainability via SHAP (Shapley Additive Explanation)	Clinical and dosimetric features including mean lung/esophagus dose, lung V20, esophagus V20	Grade ≥3 pulmonary, cardiac, and esophageal toxicities	Cardiac toxicity as a separate endpoint; no significant predictive thresholds found	Thresholds identified via SHAP and validated using logistic regression; model performance measured with AUC	Prediction/Dosiomics	ML models outperformed logistic regression (AUC 0.739 for pulmonary, 0.706 for cardiac, 0.721 for esophageal); specific dose thresholds identified for pulmonary and esophageal toxicity; cardiac toxicity thresholds not identified	ML with explainable AI can empirically validate and discover clinically useful dosimetric thresholds for toxicity in NSCLC radiotherapy	Uses explainable AI to make ML predictions interpretable; secondary analysis; focuses on dose-toxicity relationships rather than survival
Interpretable Machine Learning for Choosing Radiation Dose-volume Constraints on Cardio-pulmonary Substructures Associated with Overall Survival in NRG Oncology RTOG 0617.	Lee SH and Geng H and Arnold J and Caruana R and Fan Y and Rosen MA and Apte AP and Deasy JO and Bradley JD and Xiao Y	International Journal of Radiation Oncology, Biology, Physics	2023	428	Lung cancer	Explainable Boosting Machine (EBM); multiblock sparse partial least squares regression; supervised PCA; Boruta; random survival forest; extreme gradient boosting; DeepSurv	Dose-volume histogram features of cardiopulmonary substructures (heart chambers, pericardium, lungs), clinical parameters (chemotherapy), overlap volumes with PTV	Overall survival (OS) prediction; selection of dose-volume constraints for cardiopulmonary substructures	Indirect, via cardiac dose constraints associated with OS (LA_V60Gy, pericardium_D30%, RA_V55Gy)	Training/validation/test split (230/149/49); model performance evaluated via Harrell’s C-index; compared with Cox, random survival forest, gradient boosting, DeepSurv	Prediction/Dosiomics	EBM outperformed other models (C-index = 0.653); top predictive features: LA_V60Gy(%), pericardium_D30%(Gy), lungs-CTV_PTV_Voverlap(%), RA_V55Gy(%), chemotherapy status; suggested constraints for improved OS: LA_V60Gy < 25.6%, lungs-CTV_PTV_Voverlap < 1.1%, pericardium_D30 < 18.9 Gy, RA_V55Gy < 19.5%, received chemo = Yes	Explainable ML (EBM) can identify cardiac dose features impacting OS and guide dose-volume constraints for cardiopulmonary substructures in NSCLC radiotherapy	Integrates AI-based survival prediction with clinical dosimetry guidance; emphasizes interpretable ML for treatment planning
Open-source, fully-automated hybrid cardiac substructure segmentation: development and optimisation.	Finnegan RN and Chin V and Chlap P and Haidar A and Otton J and Dowling J and Thwaites DI and Vinod SK and Delaney GP and Holloway L	Physical and Engineering Sciences in Medicine	2023	330	Breast and Lung	Deep learning	CT scans; manual contours of the whole heart, cardiac chambers, and bases of great vessels; anatomical references or geometric models for coronary arteries, heart valves, and conduction nodes	Fully automated segmentation of (Whole heart (WH)Cardiac chambers, Great vessels, Coronary arteries, Heart valves, Conduction nodes)	Indirect via automated cardiac structure segmentation	DL whole-heart model validated with 5-fold cross-validation; tested full hybrid pipeline on 30 CT scans, comparing automatic segmentations to manual contours (DSC, MDA, HD, and volume ratio)	Imaging/Segmentation	median DSC 0.81–0.93 for whole heart/chambers, 0.43–0.76 for great vessels/conduction nodes, 0.22–0.53 for valves; median MDA <6 mm, HD 7.7–19.7 mm, volume ratios ~0.95–1.49 (except LMCA 2.07); fully automatic segmentation runtime 9–23 min	Hybrid segmentation using deep learning, whole-heart-guided multi-atlas mapping, and geometric modelling can accurately and reliably delineate cardiac substructures on radiotherapy planning CT scans		Peyton
Percutaneous Coronary Intervention Mortality, Cost, Complications, and Disparities after Radiation Therapy: Artificial Intelligence-Augmented, Cost Effectiveness, and Computational Ethical Analysis	Monlezun, DJ	Journal of Cardiovascular Development and Disease	2023	148755036	Thoracic Cancers	Regression model, Neural Network	patient demographics (age, sex, race, insurance type, income level, and geographic region), clinical comorbidities identified by ICD-10 codes, a diagnosis-related group–based mortality risk score, prior radiation therapy status	primary output- in-hospital mortality, secondary outputs- PCI, post–radiation therapy PCI, complications, and total hospitalization cost	percutaneous coronary intervention (PCI)	Validation was performed by comparing the multivariable regression results with machine learning models using backward-propagation neural networks. Model performance was evaluated using fully adjusted regression analyses, with results reported as odds ratios and 95% confidence intervals.	Prediction	PCI prevalence post-radiation AMI 0.81–1.17% vs 1.09–1.38% non-radiation; post-PCI complications low (PE 2017 OR 2.57, others ns); post-PCI mortality OR 0.44–0.58 radiation, 0.58–0.99 non-radiation; PCI cost +USD 61k/patient, cost-effectiveness USD 11.5M/life; disparities: females, African Americans, Medicaid/uninsured less likely PCI; regional difference: Mid-Atlantic −6.39% vs South Atlantic.	Highlights persistent disparities in post-radiation PCI and AMI care, with significant clinical, economic, and ethical implications, supporting targeted interventions to improve equity and outcomes.		Peyton
Validation of a Fully Automated Hybrid Deep Learning Cardiac Substructure Segmentation Tool for Contouring and Dose Evaluation in Lung Cancer Radiotherapy	Chin, V and Finnegan, RN and Chlapy, P and Otton, J and Haidar, A and Holloway, L and Thwaites, DI and Dowling, J and Delaney, GP and Vinod, SK	Clinical Oncology	2023	30	Lung cancer	Deep Learning	Planning CT scans and RT plan dose Outputs compared against expert manual contours, metrics: DSC, mean distance to agreement (MDA), Hausdorff distance, volume differences/ratios, dosimetry: mean/max dose differences, pearson r, DVH MAE	Automatically generated contours for 18 cardiac structures plus corresponding dose metrics (e.g. mean/max dose; DVH agreeement)	Not applicable	External/independent validation on spatial accuracy (DSC, MDA, Hausdorff, volume) and dose agreement	Imaging/Segmentation	Whole heart + chambers: median DSC 0.75-0.93; median MDA 2.09-3.34 mm. Smaller structures: valves/conduction nodes; median MDA 6.45 - 8.54 mm. In 27 curative cases, mean-dose differences for heart/chambers -1.12 to 0.57 Gy (median absolute % diff 1.13-3.25%); smaller substructures showed wider variation (mean-dose median difference -2.25 to 4.45Gy; median absolute % difference 0.94-6.79%)	"The novel hybrid automatic segmentation tool reported high accuracy and consistency over a validation set with challenging anatomical and imaging variations. This has promising applications in substructure dose calculations of large-scale datasets and for future studies on long-term cardiac toxicity."		Joe
A causal network model to estimate the cardiotoxic effect of oncological treatments in young breast cancer survivors	Bernasconi, A and Zanga, A and Lucas, PJF and Scutari, M and Trama, A and Stella, F	Progress in Artificial Intelligence	2024	1440	Breast cancer	Causal network model (Causal AI)	Prognostic factors: age, tumor grade, histology, ki67, molecular subtype, vascular invasion, lymph node involvement, tumor dimension. Treatments: neoadjuvant/adjuvant chemotherapy, radiotherapy, molecular targeted therapy, and hormone therapy.	Cardiotoxicity and cardiovascular diseases (CVDs)	Administrative datasets (hospital discharge records, outpatient flows) and clinical follow-up for events like arrhythmia, heart failure, and ischemic heart disease.	Validated by comparing estimated causal effects to medical literature and through review by a clinical expert.	Prediction/Explaining Causation – Designed to disentangle long-term treatment impacts and predict individual susceptibility to cardiotoxicity.	The model highlighted causal effects on cardiotoxicity for neoadjuvant chemotherapy, radiotherapy, and targeted molecular therapies. The causal roles of adjuvant and hormone therapies remained unclear.	Combining clinical expert knowledge with causal discovery algorithms allows for the creation of a valid model to predict cardiotoxicity in young breast cancer survivors, even when data is biased or missing.	The study specifically addresses the rarity and aggressive nature of breast cancer in younger women (AYAs) and the limitations of traditional scores like the Framingham score.	Wes
Automatic segmentation of cardiac structures can change the way we evaluate dose limits for radiotherapy in the left breast	Borges, MG and Gruenwaldt, J and Barsanelli, DM and Ishikawa, KE and Stuart, SR	Journal of Medical Imaging and Radiation Sciences	2024	39	Breast cancer	Deep learning (CNN) for autosegmentation and Linear regression for DVH	RT planning computed tomographic (CT) scans	1. Autosegmentation of cardiovascular structures and organs at risks (OAR) (aorta, heart, RT/LT atrium and ventricles, LT breast, LT Lung and cardiac area). 2. Dose volume parameters calculation compare the relationship between the volume of the cardiac area and the volume of the OARs.	Delination guidelines (RTOG 1005)	Radiation Oncologist revised all the contours	Imaging/Segmentation	AI based deep learning autosegmentation tools are efficient in cardiac structures segmentation using RT planning CT. greater number of highly correlated comparisons for absolute dose-volume assessment in RT received breast cancers.	AI automatic tools can overcome the technical difficulties in Dose-volume assessment protocols in patients with LT Breast cancer considering the cardiac substructures.
Cardiac Substructure Dose and Survival in Stereotactic Radiotherapy for Lung Cancer: Results of the Multi-Centre SSBROC Trial	Chin, V and Chlap, P and Finnegan, R and Hau, E and Ong, A and Ma, X and Descallar, J and Otton, J and Holloway, L and Delaney, GP and Vinod, SK	Clinical Oncology	2024	117	Lung cancer	Deep learning	Physical and EQD2 doses to 18 cardiac substructures, mean heart dose (MHD), maximum doses, patient demographics (age, gender)	Overall survival (OS), pericardial effusion	Pericardial effusion grade 2–3 (clinical evaluation)	Applied automatic segmentation to trial planning CTs; doses to substructures calculated; survival analyses performed using Kaplan-Meier and Cox models	Imaging/Segmentation/Dosiomics	Highest physical mean doses: superior vena cava 22.5 Gy, sinoatrial node 18.3 Gy; highest maximum doses: heart 51.7 Gy, right atrium 45.3 Gy; 4 patients had grade 2–3 pericardial effusion; higher-than-median MHD associated with poorer survival (p = 0.00004); male gender and max dose to ascending aorta significant on multivariable analysis	SABR for lung cancer can deliver high doses to cardiac substructures; median MHD stratifies survival; dose to ascending aorta and gender also impact OS. Further studies needed to refine cardiac substructure dosimetry and clinical implications.	Demonstrates utility of deep learning auto-segmentation for detailed cardiac dosimetry in SABR; prospective multi-centre dataset.
Cardiopulmonary Substructure Doses are Not Correlated With Cardiorespiratory Fitness Among Breast Cancer Survivors Treated With Contemporary Radiation Therapy	Thor, M and Scott, JM and Reiner, AS and Hong, LD and Yu, AF and Apte, A and Mccormick, B and Perez-Andujar, A and Lee, CP and Cervino, L and Harrison, J and Liang, XL and Patel, P and Dauer, LT and Moskowitz, CS and Bernstein, JL	Advances in Radiation Oncology	2024	65	Breast cancer	Convolutional neural networks (CNNs)	Mean dose to 9 cardiac substructures, ipsilateral and contralateral lungs, radiation therapy technique (volumetric modulated arc therapy vs other), cancer laterality	Association between substructure doses and cardiorespiratory fitness (linear regression)	Cardiorespiratory fitness used as functional cardiopulmonary outcome (not clinical events)	Analysis across 65 patients treated 2007–2021; comparisons by RT technique and laterality; linear regression adjusted for covariates	Imaging/Dosiomics	Median mean heart dose 0.64 Gy; highest mean dose to left ventricle (0.88 Gy); volumetric modulated arc therapy and left-sided cancer associated with higher doses; no significant association between substructure dose and reduced cardiorespiratory fitness after adjustments	Modern breast cancer RT minimizes cardiopulmonary doses; laterality and RT technique affect substructure doses, but these doses are not correlated with cardiorespiratory fitness	Supports the efficacy of contemporary RT planning in reducing functional cardiopulmonary toxicity; emphasizes AI auto-segmentation for precise dose assessment.
Clinical Feasibility of Artificial Intelligence-Based Autosegmentation of the Left Anterior Descending Artery in Radiotherapy for Breast Cancer	Mohan, A and Talapatra, K and Sankhe, M and Kiron, G and Maniar, P and Kolekar, A and Kushe, S and Kharote, P and Singh, A and Patel, K and Gupta, A and Patel, D and Bardeskar, N and Patkar, D	Indian Journal of Medical and Paediatric Oncology	2024	9	Breast cancer	Deep Learning	LAD artery imaging features, contour size, interpatient variability, AI model performance	Feasibility and accuracy of AI-based LAD autosegmentation	LAD artery dose/exposure (structural surrogate, not clinical events)	Analysis of non-contrast CT datasets; evaluation of interpatient variability and AI concordance	Imaging/Segmentation	LAD artery has small contour size (~5 pixels), high interpatient variability (5–7× contour size), inconsistent position, and skewed feature distribution; AI algorithms had poor concordance	LAD artery autosegmentation is challenging due to small size, variable path, and high variability; anatomical landmark-based approaches are recommended to improve accuracy	Highlights limitations of AI autosegmentation for small cardiac substructures and importance of integrating anatomical context.
Combining dosiomics and machine learning methods for predicting severe cardiac diseases in childhood cancer survivors: the French Childhood Cancer Survivor Study	Bentriou, M and Letort, V and Chounta, S and Fresneau, B and Do, D and Haddy, N and Diallo, I and Journy, N and Zidane, M and Charrier, T and Aba, N and Ducos, C and Zossou, VS and de Vathaire, F and Allodji, RS and Lemler, S	Frontiers in Oncology	2024	7367	Childhood Cancer	Random survival forests (RSF), Cox proportional hazards with Lasso/Bootstrap Lasso	Dose-volume features, dosiomics features (whole heart and subparts), survival outcomes	Prediction of late radio-induced high-grade cardiac disease	Late cardiotoxicity (high-grade cardiac disease) in childhood cancer survivors	5-fold stratified cross-validation; comparison of dosiomics models vs standard dose-volume models	Prediction	RSF with first-order dosiomics features performed slightly better (C-index 0.792 ± 0.049; IBS 0.069 ± 0.05) than standard models (C-index 0.791 ± 0.044; IBS 0.074 ± 0.056), but differences were not statistically significant	Dosiomics offers marginal improvement over traditional dose-volume metrics; standard dosimetric quantiles may suffice to estimate late radiotherapy-induced cardiac risk in childhood cancer survivors	Demonstrates limits of dosiomics for substructure-level prediction; highlights that complex ML may not always outperform conventional models in clinical CVD risk prediction.
Deep learning-based automatic segmentation of cardiac substructures for lung cancers.	Chen X and Mumme RP and Corrigan KL and Mukai-Sasaki Y and Koutroumpakis E and Palaskas NL and Nguyen CM and Zhao Y and Huang K and Yu C and Xu T and Daniel A and Balter PA and Zhang X and Niedzielski JS and Shete SS and Deswal A and Court LE and Liao Z and Yang J	Radiotherapy and Oncology	2024	142	Lung cancer	Deep Learning (U-Net)	Planning CT images, manual contours of 19 cardiac substructures (whole heart, chambers, great vessels, valves, coronary arteries)	Dice similarity coefficient (DSC), dosimetric errors, clinical acceptability	N/A — focus on accurate substructure segmentation for dose evaluation	Split dataset 75:5:20 for training/validation/testing; independent set of 42 patients for subjective clinical evaluation by 4 physicians	Imaging/Segmentation	DSC 0.95 for whole heart, 0.91 for chambers, 0.86 for great vessels, 0.81 for valves, 0.60 for coronary arteries; mean/max dose errors 1.04 ± 1.99 Gy / 2.20 ± 4.37 Gy; 94% contours clinically acceptable	nnU-Net model accurately segments cardiac substructures, including coronary arteries, with high clinical acceptability; supports radiation dose studies and treatment planning	Coronary arteries remain the most challenging substructures; model can improve efficiency and standardization in RT planning.
Development of learning-based predictive models for radiation-induced atrial fibrillation in non-small cell lung cancer patients by integrating patient-specific clinical, dosimetry, and diagnostic information	Yoo, SK and Kim, KH and Noh, JM and Oh, J and Yang, G and Kim, J and Kim, N and Kim, H and Yoon, HI	Radiotherapy and Oncology	2024	508	Lung cancer	LASSO for feature selection, Logistic regression ; hybrid deep learning model, multilayer perceptron (MLP), convolutional neural network (CNN), recurrent network (RNN), vision transformer for prediction network (CNN) [25], recurrent neural network (RNN) [26], or vision transformer [27])	159 patient-specific features including clinical data, dosimetry (heart, sinoatrial node doses), diagnostic information	Incidence of radiation-induced atrial fibrillation (AF)	Atrial fibrillation diagnosed post-CRT	Internal and external validation; AUC performance	Prediction	Hybrid deep learning AUC: 0.817 (internal), 0.806 (external); ML AUC: 0.801 (internal), 0.776 (external); maximum heart and SAN dose identified as key predictive features	Learning-based models can predict radiation-induced AF in NSCLC patients, highlighting the importance of maximum heart and SAN dose in AF risk	Integrates clinical, dosimetric, and diagnostic data; model performs consistently across internal and external cohorts.
Estimating the risk of major adverse cardiac events following radiotherapy for left breast cancer using a modified generalized Lyman normal-tissue complication probability model.	Lai TY and Hu YW and Wang TH and Chen JP and Shiau CY and Huang PI and Lai IC and Liu YM and Huang CC and Tseng LM and Huang N and Liu CJ	Breast	2024	1100	Breast cancer	Regression model	Individual left ventricle (LV) equivalent uniform dose (EUD), clinical risk factors, comorbidity status	Major adverse cardiac events (MACE) following radiotherapy	MACE defined as post-radiotherapy cardiac events; model uses LV dose and clinical factors to estimate risk	Model fitted using maximum likelihood estimation; subgroup analysis for low- and high-comorbidity groups	Prediction	64 MACE events over median 7.8 years; affected patients had higher mean LV dose (4.1 Gy vs 2.9 Gy); D50 values 43.3 Gy overall, 30 Gy (high-comorbidity), 45 Gy (low-comorbidity); limiting LV EUD <5 Gy yielded 10-year MACE risk <1.3–1.5%	Comorbid patients are more susceptible to cardiac events after breast RT; modified NTCP model provides individualized risk estimates incorporating dosimetric and clinical factors	Large cohort; long follow-up; model not a traditional ML/AI algorithm but a statistical risk prediction tool; focuses on late cardiac outcomes
Evaluating coronary arteries and predicting MACEs using CCTA in lung cancer patients receiving chemotherapy or chemoradiotherapy	Xie, YH and Shen, HS and Xu, Q and Tu, CR and Yang, R and Liu, T and Tang, H and Miao, ZM and Zhang, JQ	Radiotherapy and Oncology	2024	822	Lung cancer	Deep Learning (U-Net)	Coronary computed-tomography angiography (CCTA) parameters including fat attenuation index (FAI), coronary artery calcium (CAC) score, CAD-RADS classification, stenosis severity, computed-tomography fractional flow reserve (CT-FFR); treatment type (CHT vs CRT)	Major adverse cardiovascular events (MACEs); CCTA-based coronary artery impairment	MACEs tracked and associated with CCTA parameters; lower CT-FFR and higher FAI linked to MACE occurrence	Comparison of CCTA parameters before and after treatment; Cox regression and Kaplan-Meier analysis for MACE prediction	Prediction	Cancer treatments associated with increased FAI, CAC, CAD-RADS, and stenosis, decreased CT-FFR; 146 MACEs observed; lower CT-FFR and higher FAI before treatment predicted MACEs	AI-assisted CCTA can identify cancer treatment-related coronary impairments and predict MACEs in lung cancer patients receiving CHT or CRT	Retrospective; includes both CHT and CRT patients; control group used for baseline comparison; highlights potential for AI to stratify cardiovascular risk in oncology patients
Novel Functional Radiomics for Prediction of Cardiac Positron Emission Tomography Avidity in Lung Cancer Radiotherapy.	Choi W and Jia Y and Kwak J and Werner-Wasik M and Dicker AP and Simone NL and Storozynsky E and Jain V and Vinogradskiy Y	JCO Clinical Cancer Informatics	2024	209	Lung cancer	Tree based TPOT AutoML framework	First-order statistics, texture features such as gray level co-occurrence matrix (GLCM), gray level size zone matrix, gray level run length matrix, neighboring gray-tone difference matrix, gray level dependence matrix (GLDM), and 2D and 3D shape features.	Cardiac uptake on FDG-PET using radiomics (No myocardial uptake, diffuse myocardial uptake, focal myocardial uptake)	Cardiac FDG uptake (homogenous or heterogeneous) as a marker of inflammation and predictor of cardiac abnormalities	Trained on 80% of the TJU data with 10-fold cross-validation and tested on 20% of TJU plus external ACRIN and CU datasets.	Imaging/Rdiomics	optimized model with nine selected features achieved high performance with 92–95% accuracy on training/validation and 80–92% accuracy on external datasets	Radiomics features from standard 18F-FDG PET/CT scans can accurately predict cardiac FDG uptake	Used pretreatment scans	Peyton
Predicting heart dose in left-sided breast cancer patients using volumetric modulated arc therapy: an anatomical feature-driven machine learning model	Patil, D and Zope, MK and Raj, R and Devi, S	Journal of Radiotherapy in Practice	2024	53	Breast cancer	Regression model	maximum heart distance, total heart volume within the tangential field, total contoured heart volume, and planning target volume	Mean radiation (gy) heart dose	CVD risk was assessed indirectly, using radiation dose–based surrogate markers	internally validated using a train–test approach (70:30) performance evaluated on independent test set using root mean squared error and median absolute error. Cross-validation was applied during model training	Prediction/Dosiomics	Mean heart dose (Gy) 4.40–6.24 across VMAT techniques; V5Gy 19.6–29.7%; V25Gy 2.7–5.6%; VMAT-4P had lowest RMSE for mean dose (0.91 Gy), VMAT-5P best for V5Gy (RMSE 4.82%), VMAT-2P best for V25Gy (MEDAE 1.01); MHD was the most important predictor (≈75%), followed by THV (18%), HV (4%), PTV (3%)	Elastic Net models using standard anatomical features can accurately predict mean heart dose and dose-volume metrics in left-sided breast cancer patients undergoing VMAT.		Peyton
Prediction of new-onset atrial fibrillation in patients with non-small cell lung cancer treated with curative-intent conventional radiotherapy.	Tohidinezhad F and Nürnberg L and Vaassen F and Ma Ter Bekke R and Jwl Aerts H and El Hendriks L and Dekker A and De Ruysscher D and Traverso A	Radiotherapy and Oncology	2024	374	Lung cancer	Regression model	Clinical factors (age, BMI, alcohol use, lung function, cardiac procedure history) Tumor characteristics Radiation dosimetry (Heart volume, LA Dmax) Baseline EKG and lab data	New onset Atrial fibrillation (AF)	Clinically confirmed atrial fibrillation diagnosed by a cardiologist using ECG or holter monitoring	Internal validation using 1000 bootstrap samples was performed for optimism-correction. Performanced assessed with AUC, calibration curves, and decision curve analysis. Nomogram created for clinical risk estimation. No external validation cohort	Prediction	11.2% of patients developed new-onset Afib Left atrium Dmax was the most predictive dosimetric factor Combined clinical + dose model achieved optimism-corrected AUC ~ 0.80 Higher age, obesity, alcohol use, prior cardiac procedures, upper lobe tumors, concurrent chemotherapy, higher creatinine, and higher LA Dmax increased AF risk	A model that combines clinical and cardiac substructure dose can identify NSCLC patients at high-risk for post-radiotherapy atrial fibrillation	Only DL used for substructure contouring	Joe
Prospective deployment of an automated implementation solution for artificial intelligence translation to clinical radiation oncology	Kehayias, CE and Yan, YJ and Bontempi, D and Quirk, S and Bitterman, DS and Bredfeldt, JS and Aerts, HJWL and Mak, RH and Guthier, CV	Frontiers in Oncology	2024	TBD	Multiple cancers	Deep Learning	Planning CT images; clinician drawn contours; AI-generated contours; geometric comparison metrics used for QA	myocardial uptake	death.)	AI models trained on historical data and validated against prior manual contours, then deployed prospectively to run automatically on new patients in real clinical workflows, generating QA feedback	Imaging/Segmentation	Supported reliable, automatic AI operation in live practic across thousands of cases with minimal manual intervention. Enabled continuous contour QA and on-demand segmentation	Automated AI infrastructure can be deployed prospectively in routine RO workflows		Joe
The Association of Incidental Radiation Dose to the Heart Base with Overall Survival and Cardiac Events after Curative-intent Radiotherapy for Non-small Cell Lung Cancer: Results from the NI-HEART Study.	Walls GM and O'Connor J and Harbinson M and Duane F and McCann C and McKavanagh P and Johnston DI and Giacometti V and McAleese J and Hounsell AR and Cole AJ and Butterworth KT and McGarry CK and Hanna GG and Jain S	Clinical Oncology	2024	478	Lung cancer	Deep learning for auto-segmentation and regression model for prediction	Heart dose metrics (Dmax), patient demographics, tumor stage, treatment factors (PTV, lung dose), CVD risk factors, established CVD	Overall survival; incidence of symptomatic cardiac events (atrial fibrillation, HF, ACS)	Clinically verified cardiac events verified by cardiologists graded using CTCAE v5	Individual patient heart base contours / Multivariate cox regression for survival and fine-gray models for cardiac events wtih competing risk of death / Not prospectively applied to treatment planning	Prediction/Dosiomics	Higher heart base Dmax was independently associated with worse OS (HR 1.40, 95% confidence interval 1.14–1.75, P = 0.0017)) and increased risk of cardiac events (HR ratio 1.75, 95% confidence interval 1.03–2.97, P = 0.04) after adjustment for tumor, treatment, and CV factors	RT dose to the heart base is independently associated with both mortality and clinically significant cardiac events in NSCLC, supporting the heart base as a critical cardiac sub-organ at risk		Joe
The influence of cardiac substructure dose on survival in a large lung cancer stereotactic radiotherapy cohort using a robust personalized contour analysis	van der Pol, LHG and Pomp, J and Hoesein, FAAM and Raaymakers, BW and Verhoeff, JJC and Fast, MF	Physics and Imaging in Radiation Oncology	2024	730	Lung cancer	Deep learning (U-Net) for autosegmentation and ML for survival modeling (elastic net cox regression, random forests)	Cardiac substructure dose metrics, DL-derived contours, a/b assumptions, patient demographics, tumor and treatment characteristics (PTV, pathology, age, sex)	Overall survival; Identification of influental cardiac substructure dose parameters, LA mean dose threshold	Cardiac dose-survival association used as surrogate for cardiovascular toxicity	Internal validation only. DL contours evaluated on held-out test set (Dice, MSD, HD). Survival models assessed via bootstrapping, variable-selection stability, and robustness to contour and a/b uncertainty	Imaging/Segmentation	Deep learning cardiac substructure auto-contouring achieved high accuracy (median Dice >0.8, MSD < 2mm. Using elastic net Cox and random survival forest models with bootstrapping and robustness analyses, left atrium mean dose was consistently identified as the most influential cardiac dose parameter for OS, remaining significant across contour and a/b uncertainty, with a dose threshold of ~3.3 Gy…	Acounting for contouring and radiobiologic uncertainty, DL-enabled analysis identified the LA mean dose as the most influental cardiac substructure predictor of OS in lung SBRT patients	No direct cardiac event data. Supports consideration of LA dose contraints in lung SBRT planning	Joe
Automated contouring for breast cancer radiotherapy in the isocentric lateral decubitus position: a neural network-based solution for enhanced precision and efficiency	Loap, P and Monteil, R and Kirova, Y and Vu-Bezin, J	Strahlentherapie and Onkologie, Journal of Raiation Oncology, Biology, Physics	2025	24	Breast cancer	Deep Learning	CT scans of breast cancer patients in the lateral decubitus (LDP) position	Accuracy and efficiency of automated organ-at-risk (OAR) and planning target volume (PTV) contouring	N/A (Focus is on contouring accuracy, not CVD outcome)	A neural network was trained, and its automated contours were compared with manually drawn contours by three radiation oncologists.	Imaging/Segmentation	The mean Dice Similarity Coefficient (DSC) was high for most structures, ranging from $0.85$ to $0.97$. * The automated contours of the heart, ipsilateral lung, contralateral lung, and PTV were clinically acceptable in $92\%$ to $100\%$ of cases. * Contouring time was significantly reduced from $21.5 \pm 5.1$ minutes (manual) to $0.43 \pm 0.08$ minutes (automatic).	The proposed neural network-based solution can automatically contour OARs and PTVs for LDP breast radiotherapy with high accuracy and efficiency, potentially making this treatment technique more broadly applicable.	The lateral decubitus position (LDP) is used to minimize dose to OARs, particularly the heart. The network was trained and evaluated on 24 patients.	Wes
Baseline atrial volume indices and major adverse cardiac events following thoracic radiotherapy	Qiao, EM and He, JH and Silos, KD and Gasho, JO and Belen, P and Bitterman, DS and Mckenzie, E and Steers, J and Guthier, C and Nohria, A and Lu, MT and Aerts, HJWL and Nikolova, AP and Mak, RH and Atkins, KM	Frontiers in Cardiovascular Medicine	2025	984	Breast and Lung	Extreme Gradient Boosting (XGBoost)	Clinical variables, RT dosimetry, CT-derived cardiac substructure segmentations, atrial volume indices (RAVI, LAVI)	Major adverse cardiac events (MACE) after thoracic RT	Occurrence of MACE	External validation in independent NSCLC and breast cancer cohorts; Fine-Gray competing-risk regression	Prediction	XGBoost AUC: 0.68 (train), 0.71 (test); RAVI significantly predicted MACE (discovery sHR 1.02/unit, p=0.03); External validation confirmed RAVI association (NSCLC sHR 1.05, p=0.04; breast sHR 1.06, p=0.03); LAVI showed similar associations	Baseline atrial enlargement (RAVI, LAVI) is a novel ML-identified predictor of MACE after thoracic RT and remains consistent across external lung and breast cancer cohorts.	Reinforces the prognostic relevance of atrial volumes; supports incorporating atrial metrics into pre-RT cardiac risk profiling.
Development and Validation of a Prediction Model for Cardiac Events in Patients With Hepatocellular Carcinoma Undergoing Stereotactic Body Radiation Therapy	Lee, HI and Son, J and Cho, B and Goh, Y and Jung, J and Park, JH and Chie, EK and Kim, KS and Kim, YH and Kang, HC and Yoon, SM	International Journal of Radiation Oncology Biology Physics	2025	1893	Hepatocellular carcinoma	Logistic regression for prediction, deep-learning for segmentation	15 clinical variables (age, hypertension, smoking, history of cardiac disease, etc.) and 88 dosimetric parameters (i.e., heart V5)	Major adverse cardiac events (MACEs, grade ≥3 CTCAE v5.0); coronary artery disease as secondary outcome	MACEs per CTCAE v5.0 (grade ≥3 cardiac events)	External validation cohort (n = 420); model discrimination (AUC), calibration, and risk stratification into low-, intermediate-, and high-risk groups	Prediction	MACE incidence: 5.8% (development) and 6.7% (validation); CEI model AUC 0.770 (development) and 0.809 (validation); stratified MACE rates: 0.4%, 4.9%, 22.8% (low-, intermediate-, high-risk)	CEI model accurately predicts MACEs in HCC patients receiving SBRT; clinical factors dominate risk, with minimal SBRT dose impact, except in high-risk groups; useful for cardiac dose optimization in SBRT planning	Model integrates clinical and dosimetric features; can guide evidence-based RT planning to reduce cardiac toxicity.
Estimation of heart dose in left breast cancer radiotherapy: Assessment of vDIBH feasibility using the supervised machine learning algorithm	Rajurkar, SA and Verma, T and Gupta, R	Journal of Applied Clinical Medical Physics	2025	103	Breast cancer	Regression model	Haller Index, maximum heart distance (MHD), dosimetric parameters; mean heart dose (HMD)	Predicted mean heart dose under volunteer deep inspiration breath hold (vDIBH)	Heart dose exposure as a surrogate for potential cardiac toxicity	Tested on 21 patients; predicted HMD closely matched treatment planning system values (468.76 cGy vs 464.66 cGy)	Prediction/Dosiomics	Model accurately predicts mean heart dose; can aid in patient selection and plan modifications for vDIBH	Supervised ML algorithm can predict cardiac dose before treatment planning, improving safety and efficacy of left breast radiotherapy with vDIBH	Retrospective study; focuses on dose prediction rather than clinical cardiac outcomes; proof-of-concept for ML-assisted radiotherapy planning
Factors impacting cardiac dose and overall survival in post-operative non-small cell lung cancer patients	Cruz-Chamorro, R and Bryant, JM and Henning, J and Robinson, LA and Lee, DH and Fontaine, J and Toloza, E and Rosenberg, SA and Kim, J and El Naqa, I and Dilling, TJ	Radiotherapy and Oncology	2025	155	Lung cancer	Regression model	Internal target volume (ITV)/lung volume ratio, chemoradiotherapy sequencing, tumor volume, involvement of pericardial lymph node stations (4R/L, 7-12), cardiac dose	Overall survival (OS)	Cardiac dose analyzed as potential contributor to mortality; no independent effect found	Multivariable analysis with Bayesian hyperparameter tuning; variable importance analysis	Prediction/Dosiomics	ITV/lung ratio was the dominant predictor of OS; cardiac dose increased with tumor volume and pericardial lymph node involvement but did not independently affect OS	Overall survival in post-op NSCLC is driven primarily by tumor-related factors (ITV/lung ratio, nodal involvement), not by cardiac dose; cardiac dose is influenced by tumor characteristics rather than being an independent risk factor	Addresses a prior claim from LungART trial; emphasizes importance of tumor-related anatomical factors over cardiac dosimetry for survival in adjuvant NSCLC radiotherapy
Machine learning based radiomics model to predict radiotherapy induced cardiotoxicity in breast cancer.	Talebi A and Bitarafan-Rajabi A and Alizadeh-Asl A and Seilani P and Khajetash B and Hajianfar G and Tavakoli M	Journal of Applied Clinical Medical Physics	2025	83	Breast cancer	Neural network (NN), generalized linear model (GLM), Naive Bayes (NB), support vector machine (SVM), and random forrest (RF)	Cardiac dose-volume histograms, demographic data, echocardiographic parameters (2D/3D echo), radiomics features from ultrasound imaging	RT-induced cardiotoxicity at 6 months	Cardiotoxicity measured by decrease in left ventricular ejection fraction and global longitudinal strain	Five-fold cross-validation; performance evaluated using AUC	Prediction	58% of patients developed cardiotoxicity; AUCs for models progressively improved with more features: Dosimetric only (73%), Dosimetric + Demographic (75%), Dosimetric + Demographic + Clinical (85%), Dosimetric + Demographic + Clinical + Imaging (97%)	Integrating clinical and imaging features with dosimetric data substantially improves prediction of cardiotoxicity after breast cancer radiotherapy	Highlights the benefit of combining radiomics with standard clinical and dosimetric data for individualized risk assessment
Machine learning modeling of cancer treatment-related cardiac events in breast cancer: utilizing dosiomics and radiomics	Dincer, S and Akmansu, M and Akyol, O	Frontiers in Oncology	2025	42	Breast cancer	Gradient-boosted classification	Clinical data, heart-specific high-sensitivity Troponin-T (hs-TropT), radiomics features (from imaging), dosiomics features (heart-segmented dose descriptors)	Treatment-related cardiac events (subclinical cardiotoxicity)	hs-Troponin T >14 ng/L measured 2–3 weeks post-radiotherapy	Model performance assessed by AUC; cross-validation indicated mean AUC = 80.33 ± 21%; permutation tests confirmed non-randomness	Prediction	Clinical + dosiomic + radiomic model achieved validation AUC = 0.96, outperforming clinical + dosimetric model (AUC = 0.67)	Integration of radiomics and dosiomics provides superior predictive capability for early cardiac events compared to traditional clinical and dosimetric parameters	First study to utilize heart-segmented dosiomics in breast cancer; highlights potential for personalized surveillance strategies
Prediction of Radiation Therapy Induced Cardiovascular Toxicity from Pretreatment CT Images in Patients with Thoracic Malignancy via an Optimal Biomarker Approach	Long, MJ and Alnoury, M and Udupa, JK and Tong, YB and Wu, CY and Poole, N and Mannikeri, S and Ky, B and Feigenberg, SJ and Zou, JW and O'Reilly, S and Torigian, DA	Academic Radiology	2025	125	Thoracic Cancers	ML optimal biomarker (OBM), SVM	Pre-treatment radiomic features on CT from cardiovascular structures (including those based on texture, intensity, and morphology, were extracted for a total of 1078 features per object.)	Development of cardiotoxicity	During/Post RT echocardiographic features: (1) Absolute decrease in quantitative biplane (4-chamber and 2-chamber) LVEF by ≥ 10% from baseline AND average biplane LVEF < 50% at either assessment time point during or after completion of RT, OR (2) Relative decrease in left ventricular longitudinal strain by ≥ 15% from baseline at either assessment time point during or after completion of RT. and C…	Dataset divided into 60% training, 20% validation, and 20% testing (hold-out testing)	Prediction	The best feature combination based on 5 CT-based features derived from the left ventricle had the highest testing prediction accuracy of 0.88 among all objects. Prediction accuracies over all objects ranged from 0.76–0.88. Heart, Left Atrium, Aortic Arch, Thoracic Aorta, and Descending Thoracic Aorta showed the next best accuracy of 0.84. Most optimal features were texture properties based on the…	Cardiothoracic toxicity can be feasibly predicted with high accuracy in patients with pre-treatment CT imaging via machine learnning techniques		Joe
Predictive Value of Changes in Basal Myocardial 18F-Fluorodeoxyglucose Uptake for Cardiotoxicity in Patients With Locally Advanced Esophageal Cancer Receiving Definitive Radiation	Cai, GX and Wang, KY and Zhao, JR and Huang, BY and Wang, WQ and Wang, XH and Li, CB and Li, JS and Cheng, B and Yu, JM and Meng, X	International Journal of Radiation Oncology, Biology, Physics	2025	482	Esophageal cancer	Regression model	changes in segmental myocardial 18F-fluorodeoxyglucose (FDG) uptake in PET/CT (mean and maximum standardized uptake values (SUVs)). Dose voulume parametrs (DVH)	Major adverse cardiac events (MACEs) grade ≥3, and symptomatic valvular disease	MACEs graded using the Common Terminology Criteria for syndrome (unstable angina, myocardial infarction, coronary revascularization, hospitalization for heart failure or urgent visits, and cardiac death)		Prediction	change ratio in pretreatment and posttreatment basal myocardial mean standardized uptake value (SUV) remained significant after adjusting for age, pre-existing cardiac disease, and dosimetric parameters. The area under the receiver operating characteristic curves and Brier scores demonstrated favorable predictive accuracies	basal change ratio of mean SUV was an independent predictor of MACEs in patients with esophageal cancer receiving RT. Changes in basal myocardial FDG uptake are promising biomarkers for predicting radiation-induced cardiotoxicity.	No access to full article - Joe
Radiomics Analysis on Computed Tomography Images for Prediction of Chemoradiation-induced Heart Failure in Breast Cancer by Machine Learning Models	Ansari, F and Neshasteh-Riz, A and Paydar, R and Mohagheghi, F and Felegari, S and Beigi, M and Cheraghi, S	Journal of Medical Signals and Sensors	2025	54	Breast cancer	Supervised machine-learning classifiers: Random Forest (RF), Decision Tree (DT), and K-Nearest Neighbors (KNN) using radiomic, dosimetric, and clinical features; deep learning (SwinUNETR, nnUNet) used only for heart autosegmentation	Pt demographics (e.g. age, BMI, comorbidities), dosimetric features, and radiomic features extracted from CT heart segmentation	Prediction of chemoradiation-induced heart failure (based on EF change at 3 years	HF by echo EF measurements before and ~3 years after therapy	Model performance evaluated with accuracy, sensitivity, specificity, AUC. Application => feasibility of predicting heart failure risk	Prediction	46% of pts developed heart failure 873 radiomic features were extracted from the segmented area Out of 890 combined radiomic, dosimetric, and clinical features, 15 were selected RF showed best performance, with acc. of 0.85 and AUC 0.98 Patient age and V5 heart volume irradiated were key predictors of chemoradiation-induced heart failure	Combining radiomic, dosimetric, and clinical features with ML is feasible for predicting chemoradiation-induced heart failure in breast cancer patients		Joe

## Sheet: ML-Predictive models
Article	Authors	Reason for Model (Imaging vs. Prediction)	AI/ML Type	Model	ROC-AUC	Sensitivity/Recall	Specificity/precision	Accuracy	F1-Score	Calibration	Root mean squared error (RMSE)	Mean absotute error (MAE)	Other measures	Output identification	Validatation
A causal network model to estimate the cardiotoxic effect of oncological treatments in young breast cancer survivors	Bernasconi, A and Zanga, A and Lucas, PJF and Scutari, M and Trama, A and Stella, F	Prediction/Explaining Causation – Designed to disentangle long-term treatment impacts and predict individual susceptibility to cardiotoxicity.	Causal network model (Causal AI)	causal network model (Causal AI)	Not reported	Not reported	Not reported	Not reported	Not reported	Not reported	Not reported	Not reported	Primary quantitative results (adjusted causal effects, Relative Risk [95% CI]): Neoadjuvant radiotherapy → cardiotoxicity RR 17.7 [3.1, 32.2]; neoadjuvant target therapy → cardiotoxicity RR 33.3 [14.7, 52.0]; neoadjuvant target therapy → CVDs RR 30.8 [21.8, 39.8]; neoadjuvant hormone therapy → ischemic heart disease RR 0.7 [0.7, 0.8] (protective).	No clinical events	internal (training + testing on volunteers)
Acute coronary event (ACE) prediction following breast radiotherapy by features extracted from 3D CT, dose, and cardiac structures	Choi, BS and Yoo, SK and Moon, J and Chung, SY and Oh, J and Baek, S and Kim, Y and Chang, JS and Kim, H and Kim, JS	Imaging/Features; Prediction of RT-related cardiac events using CT + dose + substructure features	Deep learning for auto-segmentation and logistic regression	Two-step deep learning–driven predictive model: FC DenseNet for auto-segmentation–based feature extraction (CT + dose + cardiac substructures) followed by feature selection (variance threshold + SelectKBest + PCA) and logistic regression classification	cross-validation:0.94 independent test performance: 0.83	Cross-validation (best model): 0.87 ± 0.06. Independent test: 0.80	Cross-validation (best model): Specificity 1.00 ± 0.00. Independent test: Specificity 0.86	cross-validation: accuracy: 0.96 independent test performance: accuracy: 0.83	Not reported	Not reported	Not reported	Not reported	Best configuration: Three cardiac sub-structures (LV, LAD, RCA) with 2-channel input (CT + dose). Comparative performance (cross-validation AUC): Proposed model 0.94 ± 0.03 vs radiomics 0.84 ± 0.10 vs conventional DNN 0.52 ± 0.11.	Clinically adjudicated ACE defined as MI, ischemic heart dz, coronary revascularization, cardiac death	1. 4-fold cross-validation; 2. independent test set performance; 3. compred to radiomics; 4. Grad-CAM heatmaps to interpret substructure contribution
Artificial Intelligence-Assisted Prediction of Late-Onset Cardiomyopathy Among Childhood Cancer Survivors.	Güntürkün F and Akbilgic O and Davis RL and Armstrong GT and Howell RM and Jefferies JL and Ness KK and Karabayir I and Lucas JT Jr and Srivastava DK and Hudson MM and Robison LL and Soliman EZ and Mulrooney DA	Prediction	Machine Learning and Deep Learning (Extreme Gradient Boosting [XGBoost], Convolutional Neural Networks [CNN], and Genetic Algorithms for feature selection)	Extreme Gradient Boosting (XGBoost) classifier using ECG-derived features selected via genetic algorithm; models evaluated using ECG-only, clinical-only, and combined ECG + clinical feature sets	ECG + clinical model: 0.89 (95% CI 0.86–0.91); ECG-only model: 0.87 (95% CI 0.83–0.90); Clinical-only model: 0.69 (95% CI 0.64–0.74)	ECG + clinical: 78%; ECG-only: 76%; Clinical-only: 62%	ECG + clinical: Specificity 81%; ECG-only: 79%; Clinical-only: 66%	ECG + clinical model: 81%	Not reported	Not reported	Not reported	Not reported	Validation: Five-fold stratified cross-validation. Predictive values (ECG + clinical): PPV 30%; NPV 97%. Subgroup performance: Similar AUC (≈0.88–0.89) for prediction at 0.5–5 years and 5–9 years post-baseline.
Artificial Intelligence-Based Patient Selection for Deep Inspiration Breath-Hold Breast Radiotherapy from Respiratory Signals	Vendrame, A and Cappelletto, C and Chiovati, P and Vinante, L and Parvej, M and Caroli, A and Pirrone, G and Barresi, L and Drigo, A and Avanzo, M	Patient Selection	Recurrent neural networks (RNN): Deep Bidirectional Long Short-Term Memory (BLSTM)	ML Classifier	0.694 (test dataset)	80.1% (test dataset)	66.7% (test dataset)	71.4% (test dataset)	72.4% (test dataset)	Not reported	Not reported	Not reported	Dataset: 36 left-sided breast cancer patients (60% training, 40% testing). Eligibility definition: Patients with reduction in maximum LAD dose (∆DL) greater than the cohort median (0.46 Gy) classified as eligible for DIBH. Network architecture: Two BLSTM layers with 100 neural units each, followed by dropout layers (20% dropout), fully connected layer, softmax, and classification layer; total of …
Baseline atrial volume indices and major adverse cardiac events following thoracic radiotherapy	Qiao, EM and He, JH and Silos, KD and Gasho, JO and Belen, P and Bitterman, DS and Mckenzie, E and Steers, J and Guthier, C and Nohria, A and Lu, MT and Aerts, HJWL and Nikolova, AP and Mak, RH and Atkins, KM	Prediction	Extreme Gradient Boosting (XGBoost)	Extreme Gradient Boosting (XGBoost) tree-based machine learning model for feature discovery, followed by Fine–Gray competing-risk regression for risk estimation	0.71 (discovery cohort)	Not reported	Not reported	Not reported	Not reported	Not reported	Not reported	Not reported	Top ML-identified predictors: Right atrial volume index (RAVI, most important feature), lung V55Gy, history of coronary heart disease, heart volume, left atrial volume index (LAVI). Risk associations (adjusted competing-risk models): Each 1 ml/m² increase in RAVI associated with increased MACE risk (discovery: sHR 1.02, 95% CI 1.00–1.04, p = 0.03; NSCLC validation: sHR 1.05, 95% CI 1.00–1.11, p =…
Combining dosiomics and machine learning methods for predicting severe cardiac diseases in childhood cancer survivors: the French Childhood Cancer Survivor Study	Bentriou, M and Letort, V and Chounta, S and Fresneau, B and Do, D and Haddy, N and Diallo, I and Journy, N and Zidane, M and Charrier, T and Aba, N and Ducos, C and Zossou, VS and de Vathaire, F and Allodji, RS and Lemler, S	Prediction	Random survival forests (RSF), Cox proportional hazards with Lasso/Bootstrap Lasso	Survival analysis models including Cox Proportional Hazards, Cox PH with Lasso penalty, Cox PH with Bootstrap Lasso feature selection, and Random Survival Forests (RSF)	0.72–0.78	Not reported	Not reported	Not reported	Not reported	Not reported	Not reported	Not reported	Feature importance: V30, mean heart dose; Best C-index: RSF with screened first-order dosiomics (whole heart) IPCW C-index 0.792 ± 0.049. Best Integrated Brier Score: RSF with first-order dosiomics from heart subparts IBS 0.069 ± 0.050. Comparator (standard models): Cox PH with mean heart dose IPCW C-index 0.774 ± 0.034; IBS 0.074 ± 0.056; Cox PH with dose–volume indicators IPCW C-index 0.791 ± 0…
Development and application of an elastic net logistic regression model to investigate the impact of cardiac substructure dose on radiation-induced pericardial effusion in patients with NSCLC	Niedzielski, JS and Wei, X and Xu, T and Gomez, DR and Liao, ZX and Bankson, JA and Lai, SPY and Court, LE and Yang, JZ	Prediction/Dosiomics	Regression model	Elastic net logistic regression	0.820 (cross-validated model with heart + substructures); 0.879 (final fitted model)	Not reported	Not reported	0.743 (cross-validated heart + substructures model); 0.801 (final fitted model)	Not reported	Calibration slope/intercept: 1.356 / 0.235 (cross-validated heart + substructures model); 1.352 / 0.174 (final fitted model)	Not reported	Not reported	Whole-heart + substructure model outperformed heart-only model across all metrics: AUC 0.820 vs 0.799; accuracy 0.743 vs 0.713; calibration slope 1.356 vs 2.456; calibration intercept 0.235 vs 0.729 (all p < 0.05).
Development and Validation of a Prediction Model for Cardiac Events in Patients With Hepatocellular Carcinoma Undergoing Stereotactic Body Radiation Therapy	Lee, HI and Son, J and Cho, B and Goh, Y and Jung, J and Park, JH and Chie, EK and Kim, KS and Kim, YH and Kang, HC and Yoon, SM	Prediction	Logistic regression for prediction, deep-learning for segmentation	Multivariable logistic regression–based normal tissue complication probability (NTCP) model; simplified Cardiac Event Index (CEI) risk score	0.770 (development cohort, CEI for MACEs); 0.809 (validation cohort, CEI for MACEs); 0.750 (development cohort, coronary artery disease); 0.793 (validation cohort, coronary artery disease)	97.7% (low-risk group, development cohort, MACE exclusion); 96.4% (low-risk group, validation cohort, MACE exclusion)	89.3% (high-risk group, development cohort, MACE prediction); 85.0% (high-risk group, validation cohort, MACE prediction)	Not reported	Not reported	Hosmer–Lemeshow test P = 0.565 (development cohort, CEI); P = 0.800 (validation cohort, CEI)	Not reported	Not reported	MACE incidence: 5.8% (86/1473) development cohort; 6.7% (28/420) validation cohort. CEI stratified patients into low-, intermediate-, and high-risk groups with MACE rates of 0.4%, 4.9%, and 22.8% (development cohort) and 0.8%, 4.1%, and 23.4% (validation cohort).
Development of deep learning chest X-ray model for cardiac dose prediction in left-sided breast cancer radiotherapy	Koide, Y and Aoyama, T and Shimizu, H and Kitagawa, T and Miyauchi, R and Tachibana, H and Kodaira, T	Prediction	Convolutional neural network (CNN). + regression model	Convolutional neural network (CNN)–based regression model using paired anteroposterior and lateral chest X-ray images with clinical covariates	0.864 (binary classification of ΔMHD > 1 Gy)	0.857	0.909	0.88	Not reported	Not reported	0.73 Gy (ΔMHD prediction)	0.56 Gy (ΔMHD prediction)	Positive predictive value 92.3%; negative predictive value 83.3%; Pearson correlation between observed and predicted ΔMHD = 0.55 (P = 0.028); R² = 0.30; median absolute residual 0.39 Gy (IQR 0.22–0.72); for MHDFB prediction: median absolute error 0.72 Gy, correlation 0.46 (P = 0.02), sensitivity 0.58, specificity 0.77.
Development of learning-based predictive models for radiation-induced atrial fibrillation in non-small cell lung cancer patients by integrating patient-specific clinical, dosimetry, and diagnostic information	Yoo, SK and Kim, KH and Noh, JM and Oh, J and Yang, G and Kim, J and Kim, N and Kim, H and Yoon, HI	Prediction	LASSO for feature selection, Logistic regression ; hybrid deep learning model, multilayer perceptron (MLP), convolutional neural network (CNN), recurrent network (RNN), vision transformer for prediction network (CNN) [25], recurrent neural network (RNN) [26], or vision transformer [27])	Machine learning model (LASSO + PCA + logistic regression with intervention) and hybrid deep learning model (MLP + BiLSTM + logistic regression)	Internal validation: 0.801 (machine learning with intervention), 0.817 (deep learning with calibration); External validation: 0.776 (machine learning with intervention), 0.806 (deep learning)	Internal validation: 81.67% (machine learning with intervention), 83.33% (deep learning with calibration); External validation: 83.33% (machine learning with intervention), 83.33% (deep learning)	Internal validation: 78.33% (machine learning with intervention), 80.00% (deep learning with calibration); External validation: 71.82% (machine learning with intervention), 77.90% (deep learning)	Internal validation: 80.01% (machine learning with intervention), 81.66% (deep learning with calibration); External validation: 72.19% (machine learning with intervention), 78.08% (deep learning)	Not reported	Temperature scaling applied to deep learning model in internal validation; post-calibration AUC = 0.817	Not reported	Not reported	Machine learning without intervention showed lower internal AUC = 0.767 and external AUC = 0.665. Hybrid deep learning preserved performance across datasets with minimal AUC degradation (internal 0.817 → external 0.806). Class imbalance addressed using SMOTE; AF incidence 17/321 (internal) and 6/187 (external).
Dosimetric Planning Tradeoffs to Reduce Heart Dose Using Machine Learning-Guided Decision Support Software in Patients with Lung Cancer	Bitterman, DS and Selesnick, P and Bredfeldt, J and Williams, CL and Guthier, C and Huynh, E and Kozono, DE and Lewis, JH and Cormack, RA and Carpenter, CM and Mak, RH and Atkins, KM	Prediction/Dosiomics	machine learning-guided clinical decision support software (Classification models: Boosting framework, decision trees and regression learning)	Machine learning–guided clinical decision support system using boosted decision-tree classification models for radiotherapy plan matching	Not reported	Not reported	Not reported	Not reported	Not reported	Not reported	Not reported	Not reported	Predicted MHD reductions >4–8 Gy in 39.2% of plans (modality-independent). Switching from 3D-CRT to IMRT: 75/103 patients (72.8%) showed improved MHD with mean reduction of 2.0 Gy (P < .0001); 25% achieved >4 Gy reduction.
Dosiomics-Based Prediction of Radiation-Induced Valvulopathy after Childhood Cancer	Chounta, S and Allodji, R and Vakalopoulou, M and Bentriou, M and Do, DT and De Vathaire, F and Diallo, I and Fresneau, B and Charrier, T and Zossou, V and Christodoulidis, S and Lemler, S and Le Chevalier, VL	Prediction/Dosiomics	Random forest algorithms	Random forest classification models (weighted Random Forest and Balanced Random Forest)	Entire cohort (FCCSS): 0.77 ± 0.047 (wtRF, dosiomics); 0.77 ± 0.051 (BRF, dosiomics). Uniformity < 1 sub-cohort: 0.86 ± 0.059 (wtRF); 0.86 ± 0.057 (BRF). Uniformity < 0.1 sub-cohort: 0.82 ± 0.073 (wtRF); 0.80 ± 0.071 (BRF).	Entire cohort: 0.59 ± 0.075 (wtRF); 0.62 ± 0.074 (BRF). Uniformity < 1: 0.73 ± 0.126 (wtRF); 0.78 ± 0.113 (BRF). Uniformity < 0.1: 0.69 ± 0.13 (wtRF); 0.74 ± 0.126 (BRF).	Entire cohort: 0.88 ± 0.015 (wtRF); 0.86 ± 0.018 (BRF). Uniformity < 1: 0.83 ± 0.031 (wtRF); 0.79 ± 0.021 (BRF). Uniformity < 0.1: 0.82 ± 0.026 (wtRF); 0.77 ± 0.028 (BRF).	Not reported	Not reported	Not reported	Not reported	Not reported	Balanced Accuracy: Entire cohort: 0.74 ± 0.038 (wtRF); 0.74 ± 0.039 (BRF). Uniformity < 1: 0.78 ± 0.057 (wtRF); 0.79 ± 0.056 (BRF). Uniformity < 0.1: 0.76 ± 0.062 (wtRF); 0.75 ± 0.056 (BRF).
Effect of Radiation Doses to the Heart on Survival for Stereotactic Ablative Radiotherapy for Early-stage Non-Small-cell Lung Cancer: An Artificial Neural Network Approach	Chan, ST and Ruan, D and Shaverdian, N and Raghavan, G and Cao, M and Lee, P	Prediction/Dosiomics	Neural Network	Artificial neural network (ANN) survival classification model	Not reported	Not reported	Not reported	0.647	Not reported	Not reported	Not reported	Not reported	Overall survival (binary classification). Input features: Maximum dose, mean dose, V10Gy, V25Gy, V50Gy for 15 cardiac substructures and whole heart, plus clinical timing variables. Train/validation/test: 95 patients for training/validation (Monte Carlo cross-validation); 17-patient independent test set.
Enhanced cardiac substructure sparing through knowledge-based treatment planning for non-small cell lung cancer radiotherapy	Momin, S and Wolf, J and Roper, J and Lei, Y and Liu, T and Bradley, JD and Higgins, K and Yang, XF and Zhang, JH	Prediction/Dosiomics	AI based Knowledge-based planning (KBP) model (RapidPlan: ML and DL KBP))	Knowledge-based treatment planning (KBP) model implemented in Varian RapidPlan™; two models evaluated: Cardiac-based KBP (C-KBP) using whole heart only, and Cardiac-substructure-based KBP (CS-KBP) using 15 manually contoured cardiac substructures	Not reported	Not reported	Not reported	Not reported	Not reported	Not reported	Not reported	Not reported	LAD V15 Gy: CS-KBP = 0.69 ± 1.57 cc vs. C-KBP = 1.05 ± 1.68 cc vs. clinical/manual = 1.23 ± 1.76 cc (p < 0.01); Primary evaluation: Dosimetric comparison using paired two-tailed t-tests (p < 0.05). Key coronary artery results (mean ± SD): LADA mean dose 9.02 ± ? Gy (CS-KBP) vs 12.88 Gy (C-KBP) vs 16.05 Gy (clinical); LADA V15 Gy 0.69 ± 1.57 cc (CS-KBP) vs 1.05 ± 1.68 cc (C-KBP) vs 1.23 ± 1.76 cc …
Estimating the risk of major adverse cardiac events following radiotherapy for left breast cancer using a modified generalized Lyman normal-tissue complication probability model.	Lai TY and Hu YW and Wang TH and Chen JP and Shiau CY and Huang PI and Lai IC and Liu YM and Huang CC and Tseng LM and Huang N and Liu CJ	Prediction	Regression model	Modified generalized Lyman normal-tissue complication probability (NTCP) model incorporating equivalent uniform dose (EUD) of the left ventricle (LV), clinical risk factors, and time-to-event (censoring) via mixture/generalized Lyman modeling; fitted using maximum likelihood estimation (MLE)	Not reported	Not reported	Not reported	Not reported	Not reported	Not reported	Not reported	Not reported	Higher mean LV dose in affected individuals (4.1 Gy vs. 2.9 Gy); model parameters: D50 = 43.3 Gy, m = 0.59, n = 0.78; Best-fit parameters (full model): D50 = 43.3 Gy (95% CI 27.9–92.3), m = 0.59 (95% CI 0.53–0.65), n = 0.78 (95% CI 0.48–8.4). Standard Lyman (no clinical factors): D50 = 30.0 Gy, m = 0.71, n = 0.74. Clinical factors included in full model: age, BMI, diabetes, hypertension, heart di…
Estimation of heart dose in left breast cancer radiotherapy: Assessment of vDIBH feasibility using the supervised machine learning algorithm	Rajurkar, SA and Verma, T and Gupta, R	Prediction/Dosiomics	Regression model	Supervised machine learning – Linear Regression model implemented using Scikit-learn; polynomial feature function applied; model developed to predict mean heart dose (HMD) from Haller Index (HI) and maximum heart distance (MHD)	Not reported	0.66	Specificity: 0.66 • Precision: 0.88	0.76	Not reported	Not reported	Not reported	Not reported	Inputs: Chest transverse diameter (A), sternum-to-vertebra distance (B); Haller Index = A/B. Outcome: Mean heart dose (HMD, cGy). Training/testing split: 70–80% training / 20–30% testing (HI→HMD); 80/20 for HMD→MHD. Observed vs predicted HMD (test set): Mean observed 468.76 cGy vs predicted 464.66 cGy (absolute difference 4 cGy). Paired t-test: t = 0.230; p = 0.819 (no significant difference). Co…
Evaluating coronary arteries and predicting MACEs using CCTA in lung cancer patients receiving chemotherapy or chemoradiotherapy	Xie, YH and Shen, HS and Xu, Q and Tu, CR and Yang, R and Liu, T and Tang, H and Miao, ZM and Zhang, JQ	Prediction	Deep Learning (U-Net)	Deep learning–based coronary analysis software (CoronaryDoc / CACScoreDoc / CT-FFR / FAI modules, Shukun Technology) using U-Net–based segmentation and hybrid computational fluid dynamics (CFD) for CT-FFR estimation; downstream risk modeling via Cox proportional hazards regression	Not reported	Not reported	Not reported	Not reported	Not reported	Not reported	Not reported	Not reported	Key predictive variables: CT-FFR, fat attenuation index (FAI), CAC score, stenosis severity, CAD-RADS.; AI-derived parameters: Coronary artery calcium (CAC) score, plaque type, stenosis severity, CAD-RADS, CT-FFR, fat attenuation index (FAI) for LAD, LCX, RCA. Baseline differences vs controls: Higher CAC, higher CAD-RADS, more severe stenosis, lower CT-FFR, higher FAI (all P<0.05). Longitudinal c…
Explainable Artificial Intelligence to Identify Dosimetric Predictors of Toxicity in Patients with Locally Advanced Non-Small Cell Lung Cancer: A Secondary Analysis of RTOG 0617	Ladbury, C and Li, RC and Danesharasteh, A and Ertem, Z and Tam, A and Liu, JS and Hao, CR and Li, RS and McGee, H and Sampath, S and Williams, T and Glaser, S and Khasawneh, M and Liao, ZX and Lee, P and Ryckman, J and Shaikh, P and Amini, A	Prediction/Dosiomics	Multiple supervised ML classification models: logistic regression, naïve Bayes, k-nearest neighbors, support vector machine, random forest, and extreme gradient boosting (XGBoost); explainability via SHAP (Shapley Additive Explanation)	Multiple supervised ML classification models: logistic regression, naïve Bayes, k-nearest neighbors, support vector machine, random forest, and extreme gradient boosting (XGBoost); explainability via SHAP (Shapley Additive Explanation)	Pulmonary toxicity (XGBoost): 0.739; Cardiac toxicity (Random Forest): 0.706; Esophageal toxicity (Naive Bayes): 0.721	Not reported	Not reported	Not reported	Not reported	Not reported	Not reported	Not reported	Key dosimetric thresholds identified via SHAP and validated: Pulmonary—Mean lung dose > 18 Gy (ML OR 2.070; 95% CI 1.508–2.967), Lung V20 > 37% (ML OR 22.268; 95% CI 12.575–37.199); Esophageal—Mean esophagus dose > 34 Gy (ML OR 1.159; 95% CI 1.092–1.249), Esophagus V20 > 37% (ML OR 1.072; 95% CI 1.022–1.132).
Factors impacting cardiac dose and overall survival in post-operative non-small cell lung cancer patients	Cruz-Chamorro, R and Bryant, JM and Henning, J and Robinson, LA and Lee, DH and Fontaine, J and Toloza, E and Rosenberg, SA and Kim, J and El Naqa, I and Dilling, TJ	Prediction/Dosiomics	Regression model	Elastic net survival regression model (regularized Cox proportional hazards framework) with Bayesian hyperparameter tuning; variable importance analysis performed	Not reported	Not reported	Not reported	Not reported	Not reported	Not reported	Not reported	Not reported	Dosimetric variables evaluated: Heart V5–V70, mean dose, D0.03cc; lung and esophagus DVHs. Univariable OS predictors (heart): Heart V30 (p=0.0207), V40 (p=0.0331), V50 (p=0.00624), mean heart dose (p=0.0197). Clinical predictors (univariable): ITV volume (p=0.0172), ITV/lung volume ratio (p=0.0031), heart volume (p=0.0165). Multivariable modeling: Elastic net with 80/20 train–validation split, 10…
Interpretable Machine Learning for Choosing Radiation Dose-volume Constraints on Cardio-pulmonary Substructures Associated with Overall Survival in NRG Oncology RTOG 0617.	Lee SH and Geng H and Arnold J and Caruana R and Fan Y and Rosen MA and Apte AP and Deasy JO and Bradley JD and Xiao Y	Prediction/Dosiomics	Survival machine-learning models: Explainable Boosting Machine (EBM) (glass-box), Cox Proportional Hazards (CPH), Random Survival Forest (RSF), Extreme Gradient Boosting Survival Embeddings (XGBSE), DeepSurv (CPH deep neural network)	Survival machine-learning models: Explainable Boosting Machine (EBM) (glass-box), Cox Proportional Hazards (CPH), Random Survival Forest (RSF), Extreme Gradient Boosting Survival Embeddings (XGBSE), DeepSurv (CPH deep neural network)	Not reported	Not reported	Not reported	Not reported	Not reported	Not reported	Not reported	Not reported	Harrell’s C-index was the primary performance metric used to evaluate overall survival discrimination (EBM achieved the highest test-set C-index of 0.653).; Primary performance metric: Harrell’s C-index. Validation set C-index (95% CI): XGBSE 0.636 (0.573–0.700); EBM 0.633 (0.564–0.701); RSF 0.628 (0.566–0.691); CPH 0.622 (0.557–0.688); DeepSurv 0.610 (0.545–0.675). Test set C-index (95% CI): EBM…
Machine learning based radiomics model to predict radiotherapy induced cardiotoxicity in breast cancer.	Talebi A and Bitarafan-Rajabi A and Alizadeh-Asl A and Seilani P and Khajetash B and Hajianfar G and Tavakoli M	Prediction	Neural network (NN), generalized linear model (GLM), Naive Bayes (NB), support vector machine (SVM), and random forrest (RF)	Supervised machine-learning classifiers with feature-selection pipelines: Support Vector Machine (SVM), Random Forest (RF), Neural Network (NN), Generalized Linear Model (GLM), Naïve Bayes (NB)	Dosimetric model achieved AUC up to 0.73; dosimetric plus demographic model achieved AUC up to 0.75; dosimetric plus demographic plus clinical model achieved AUC up to 0.85; dosimetric plus demographic plus clinical plus imaging model achieved AUC up to 0.97; AUCs were evaluated using five-fold cross-validation.	Not reported	Not reported	Not reported	Not reported	Not reported	Not reported	Not reported	Mean left ventricular ejection fraction and global longitudinal strain decreased significantly at 6 months compared with baseline, with p-value < 0.001.; Event rate: 58.5%. Validation: 70/30 train–test split with internal 5-fold cross-validation. Feature groups evaluated: (1) Dosimetric; (2) Dosimetric + Demographic; (3) Dosimetric + Demographic + Clinical; (4) Dosimetric + Demographic + Clinical…
Machine learning modeling of cancer treatment-related cardiac events in breast cancer: utilizing dosiomics and radiomics	Dincer, S and Akmansu, M and Akyol, O	Prediction	Gradient-boosted classification	Supervised machine-learning model selected via TPOT AutoML; final algorithm: Gradient-Boosted Classification with gradient-boosted recursive feature elimination	0.96	Not reported	Not reported	Not reported	Not reported	Not reported	Not reported	Not reported	Permutation testing was used to confirm that model performance was non-random, with p < 0.05 for the two main models; event rate 16.66%. Features extracted per patient: 111 dosiomic + 119 radiomic features + clinical variables. Radiomics/dosiomics extraction: PyRadiomics (IBSI-compliant); features include first-order, shape, GLCM, GLDM, GLSZM, GLRLM, NGTDM. Model comparison (Table 1): Clinical + …
Machine Learning-Based Risk Assessment for Cancer Therapy-Related Cardiac Dysfunction in 4300 Longitudinal Oncology Patients.	Zhou Y and Hou Y and Hussain M and Brown SA and Budd T and Tang WHW and Abraham J and Xu B and Shah C and Moudgil R and Popovic Z and Cho L and Kanj M and Watson C and Griffin B and Chung MK and Kapadia S and Svensson L and Collier P and Cheng F	Prediction	Classification models: (k-nearest neighbors, LR, SVM, RF, and GB)	Supervised machine-learning classification models evaluated: Logistic Regression (LR), Random Forest (RF), Gradient Boosting (GB), Support Vector Machine (SVM), and k-Nearest Neighbors (k-NN)	Coronary artery disease: AUROC 0.821 (95% CI, 0.815–0.826); atrial fibrillation: AUROC 0.787 (95% CI, 0.782–0.792); heart failure: AUROC 0.882 (95% CI, 0.878–0.887); stroke: AUROC 0.660 (95% CI, 0.650–0.670); myocardial infarction: AUROC 0.807 (95% CI, 0.799–0.816); de novo CTRCD: AUROC 0.802 (95% CI, 0.797–0.807).	Not reported	Not reported	Not reported	Not reported	Not reported	Not reported	Not reported	Multiple cardiovascular endpoints were modeled separately rather than as a composite outcome; Validation: 100 random train/val/test splits (81%/9%/10%) + time-based split (pre-2017 vs post-2017) for generalizability. Best-performing approach: LR with combined features. AUPR (combined features): HF 0.651; AF 0.401; CAD 0.481; MI 0.220; Stroke 0.138; de novo CTRCD 0.592.
Percutaneous Coronary Intervention Mortality, Cost, Complications, and Disparities after Radiation Therapy: Artificial Intelligence-Augmented, Cost Effectiveness, and Computational Ethical Analysis	Monlezun, DJ	Prediction	Regression model, Neural Network	Bayesian Machine Learning–augmented Propensity Score translational (BAM-PS) framework	Not reported	Not reported	Not reported	Not reported	Not reported	Not reported	Not reported	Not reported	Primary outcomes: Inpatient mortality; secondary outcomes included PCI utilization, complications, and costs. Key findings: Post-AMI PCI mortality generally comparable with vs without radiation; however, in breast cancer, PCI after radiation significantly increased inpatient mortality (OR 3.70, 95% CI 1.10–12.43, p = 0.035).
Predicting heart dose in left-sided breast cancer patients using volumetric modulated arc therapy: an anatomical feature-driven machine learning model	Patil, D and Zope, MK and Raj, R and Devi, S	Prediction/Dosiomics	Regression model	Elastic Net regression	Not reported	Not reported	Not reported	Not reported	Not reported	Not reported	Mean heart dose: VMAT-2P 0.9181; VMAT-4P 0.9100; VMAT-5P 1.0812. Heart V5Gy: VMAT-2P 7.9718; VMAT-4P 5.9990; VMAT-5P 4.8242. Heart V25Gy: VMAT-2P 2.1473; VMAT-4P 2.1798; VMAT-5P 2.5383.	Not reported	Median Absolute Error (MEDAE): Mean heart dose — VMAT-2P 0.5926; VMAT-4P 0.5761; VMAT-5P 0.7509. Heart V5Gy — VMAT-2P 5.5702; VMAT-4P 4.7981; VMAT-5P 2.1188. Heart V25Gy — VMAT-2P 1.0053; VMAT-4P 1.5313; VMAT-5P 2.1232. Model evaluation: 70% training / 30% testing split; metrics reported on test set.
Prediction of new-onset atrial fibrillation in patients with non-small cell lung cancer treated with curative-intent conventional radiotherapy.	Tohidinezhad F and Nürnberg L and Vaassen F and Ma Ter Bekke R and Jwl Aerts H and El Hendriks L and Dekker A and De Ruysscher D and Traverso A	Prediction	Regression model	Multivariable logistic regression-based prediction model	0.80 (95% CI 0.76 - 0.84)	Not applicable	Not applicable	Not applicable	Not applicable	"The calibration curve showed good conformation of the predicted probabilities versus the actual outcomes for probabilities ranging between 0.1 and 0.9."	Not applicable	Not applicable	Decision Curve Analysis showed positive net clinical benefit; OR reported for individual predictors; Internal validation only; Model discrimination: Apparent AUC 0.82 (95% CI 0.78–0.85); optimism-corrected AUC 0.80. Positive Predictive Value: 65% at optimal threshold (0.42). Negative Predictive Value: 85% at optimal threshold. Validation: Internal validation with 1000 bootstrap resamples.
Prediction of Radiation Therapy Induced Cardiovascular Toxicity from Pretreatment CT Images in Patients with Thoracic Malignancy via an Optimal Biomarker Approach	Long, MJ and Alnoury, M and Udupa, JK and Tong, YB and Wu, CY and Poole, N and Mannikeri, S and Ky, B and Feigenberg, SJ and Zou, JW and O'Reilly, S and Torigian, DA	Prediction	ML optimal biomarker (OBM), SVM	Support Vector Machine (SVM) classifier using an Optimal Biomarker (OBM) feature-selection	Not reported	Not reported	Not reported	0.88 for LV-derived features 0.76-0.88 across all other CV structures tested	Not reported	Not reported	Not reported	Not applicable	Feature extraction: 1,078 features per structure (GLCM, LBP texture; intensity; morphology). Feature selection: Top 6 features (Nf=6) selected using modified OBM; all possible combinations evaluated. Best-performing structure: Left ventricle (LV). Testing accuracies by structure: Range 0.76–0.88; Heart 0.84, LA 0.84, RA 0.76, RV 0.76, Ascending aorta 0.76, Aortic arch 0.84, Descending thoracic ao…
Predictive Value of Changes in Basal Myocardial 18F-Fluorodeoxyglucose Uptake for Cardiotoxicity in Patients With Locally Advanced Esophageal Cancer Receiving Definitive Radiation	Cai, GX and Wang, KY and Zhao, JR and Huang, BY and Wang, WQ and Wang, XH and Li, CB and Li, JS and Cheng, B and Yu, JM and Meng, X	Prediction	Regression model	Statistical predictive models using competing-risk regression (Fine–Gray) and Cox proportional hazards regression	Not reported	Not reported	Not reported	Not reported	Not reported	Not reported	Not reported	Not reported	HRs 2.48–3.93; Multivariate HRs (training cohort): Basal ΔSUVRmean HR 2.477 (95% CI 1.166–5.261, P=.018) in whole-heart model; consistent significance across LV, LAD, LCX, and RCA models. Patients without pre-existing cardiac disease: Basal ΔSUVRmean HRs 3.933–5.092 across models (all P≤.013). Model evaluation: Discrimination assessed by time-dependent ROC curves; overall performance by Brier sco…
Radiomics Analysis on Computed Tomography Images for Prediction of Chemoradiation-induced Heart Failure in Breast Cancer by Machine Learning Models	Ansari, F and Neshasteh-Riz, A and Paydar, R and Mohagheghi, F and Felegari, S and Beigi, M and Cheraghi, S	Prediction	Supervised machine-learning classifiers: Random Forest (RF), Decision Tree (DT), and K-Nearest Neighbors (KNN) using radiomic, dosimetric, and clinical features; deep learning (SwinUNETR, nnUNet) used only for heart autosegmentation	Supervised machine-learning classifiers: Random Forest (RF), Decision Tree (DT), and K-Nearest Neighbors (KNN) using radiomic, dosimetric, and clinical features; deep learning (SwinUNETR, nnUNet) used only for heart autosegmentation	0.98	0.83	0.85	0.85	Not reported	Not reported	Not reported	Not reported	Segmentation performance (Dice, mean ± SD): SwinUNETR 0.84 ± 0.01; nnUNet 0.82 ± 0.02 (heart ROI). Radiomics: 873 features extracted; 890 total combined features (radiomic + dosimetric + clinical); 15 features selected. Cross-validation: 5-fold CV; test split 0.2. Model comparison (Table 3): RF AUC range 0.90–0.98 depending on feature set; DT AUC 0.88–0.96; KNN AUC 0.64–0.76.
The Association of Incidental Radiation Dose to the Heart Base with Overall Survival and Cardiac Events after Curative-intent Radiotherapy for Non-small Cell Lung Cancer: Results from the NI-HEART Study.	Walls GM and O'Connor J and Harbinson M and Duane F and McCann C and McKavanagh P and Johnston DI and Giacometti V and McAleese J and Hounsell AR and Cole AJ and Butterworth KT and McGarry CK and Hanna GG and Jain S	Prediction/Dosiomics	Deep learning for auto-segmentation and regression model for prediction	Deep learning–based cardiac substructure autosegmentation model for chambers and great vessels	Not reported	Not reported	Not reported	Not reported	Not reported	Not reported	Not reported	Not reported	Dose metric of interest: Heart base Dmax (median 54.5 Gy, IQR 35.0–58.2). Overall survival: Higher heart base Dmax (dichotomised at median) associated with worse survival (20.2 vs 28.3 months); multivariable Cox HR 1.01 per Gy (95% CI 1.00–1.02, P = 0.039).
The benefits evaluation of abdominal deep inspiration breath hold based on knowledge-based radiotherapy treatment planning for left-sided breast cancer	Xu, JQ and Wang, JZ and Zhao, F and Hu, WG and Yao, GR and Lu, ZJ and Yan, SX	Prediction/Dosiomics	Knowledge-based planning (KPB) using kernel density estimation (KDE) DVH prediction models	Knowledge-based planning (KBP) using kernel density estimation (KDE) dose–volume histogram (DVH) prediction models	Not reported	Not reported	Not reported	Not reported	Not reported	Not reported	Not reported	Not reported	Model task: DVH prediction and plan deliverability assessment, not outcome prediction. Training set: 40 left-sided breast cancer patients with paired FB-CT and DIBH-CT scans. Test set: 10 additional patients with both breathing conditions.

## Sheet: Number of participants
Number of values	63														Number of patients/participants
															1440
Minimum	9														19
25% Percentile	54														84
Median	177														31
75% Percentile	984														5300
Maximum	148755036														1217
Range	148755027														36
															291
Mean	2362979														239
Std. Deviation	18741145														24
Std. Error of Mean	2361162														24000
															24
Lower 95% CI of mean	-2356917														55
Upper 95% CI of mean	7082875														2289
															39
															984
															16000
															117
															32
															65
															9
															7367
															7240
															177
															142
															6535
															141
															1893
															103
															508
															353
															7670
															134
															428
															55
															1100
															103
															822
															40
															544
															155
															15915
															Not specified
															16
															428
															83
															42
															4309
															120
															209
															330
															148755036
															53
															374
															125
															482
															TBD
															54
															933
															59
															478
															40
															730
															30
															20

## Sheet: Model Performance
Article	Authors	Reason for Model (Imaging vs. Prediction)	AI/ML Type	Model	ROC-AUC	Sensitivity/Recall	Specificity/precision	Accuracy	F1-Score	Calibration	Root mean squared error (RMSE)	Mean absotute error (MAE)	Other measures	AI/ML Type
A causal network model to estimate the cardiotoxic effect of oncological treatments in young breast cancer survivors	Bernasconi, A and Zanga, A and Lucas, PJF and Scutari, M and Trama, A and Stella, F	Prediction/Explaining Causation – Designed to disentangle long-term treatment impacts and predict individual susceptibility to cardiotoxicity.	Causal network model (Causal AI)	causal network model (Causal AI)	Not reported	Not reported	Not reported	Not reported	Not reported	Not reported	Not reported	Not reported	Primary quantitative results (adjusted causal effects, Relative Risk [95% CI]): Neoadjuvant radiotherapy → cardiotoxicity RR 17.7 [3.1, 32.2]; neoadjuvant target therapy → cardiotoxicity RR 33.3 [14.7, 52.0]; neoadjuvant target therapy → CVDs RR 30.8 [21.8, 39.8]; neoadjuvant hormone therapy → ischemic heart disease RR 0.7 [0.7, 0.8] (protective).	Causal network model (Causal AI)
A deep Boltzmann machine-driven level set method for heart motion tracking using cine MRI images.	Wu J and Mazur TR and Ruan S and Lian C and Daniel N and Lashmett H and Ochoa L and Zoberi I and Anastasio MA and Gach HM and Mutic S and Thomas M and Li H	Imaging/heart motion	Generative model: Deep Boltzmann Machine + level set	Three-layer deep Boltzmann machine (DBM)–based generative heart shape model embedded within a distance-regularized level-set evolution (DRLSE) framework for automatic heart motion tracking	Not reported	Not reported	Not reported	Not reported	Not reported	Not reported	Not reported	Not reported	First testing group (14 datasets): Breath-hold cine MRI — DSC 89.55 ± 2.26%, MME 4.26 ± 1.88 mm; Free-breathing cine MRI — DSC 88.42 ± 2.49%, MME 4.48 ± 1.49 mm; Overall — DSC 88.99 ± 2.38%, MME 4.37 ± 1.70 mm. Second (unseen) testing group (24 datasets): Breath-hold — DSC 89.11 ± 2.86%, MME 4.04 ± 1.16 mm; Free-breathing — DSC 87.17 ± 3.68%, MME 4.66 ± 1.48 mm; Overall — DSC 88.14 ± 3.41%, MME 4…	Generative model: Deep Boltzmann Machine + level set
Acute coronary event (ACE) prediction following breast radiotherapy by features extracted from 3D CT, dose, and cardiac structures	Choi, BS and Yoo, SK and Moon, J and Chung, SY and Oh, J and Baek, S and Kim, Y and Chang, JS and Kim, H and Kim, JS	Imaging/Features; Prediction of RT-related cardiac events using CT + dose + substructure features	Deep learning for auto-segmentation and logistic regression	Two-step deep learning–driven predictive model: FC DenseNet for auto-segmentation–based feature extraction (CT + dose + cardiac substructures) followed by feature selection (variance threshold + SelectKBest + PCA) and logistic regression classification	cross-validation:0.94 independent test performance: 0.83	Cross-validation (best model): 0.87 ± 0.06. Independent test: 0.80	Cross-validation (best model): Specificity 1.00 ± 0.00. Independent test: Specificity 0.86	cross-validation: accuracy: 0.96 independent test performance: accuracy: 0.83	Not reported	Not reported	Not reported	Not reported	Best configuration: Three cardiac sub-structures (LV, LAD, RCA) with 2-channel input (CT + dose). Comparative performance (cross-validation AUC): Proposed model 0.94 ± 0.03 vs radiomics 0.84 ± 0.10 vs conventional DNN 0.52 ± 0.11.	Deep learning for auto-segmentation and logistic regression
AI-Based Quantification of Planned Radiation Therapy Dose to Cardiac Structures and Coronary Arteries in Patients With Breast Cancer	van Velzen, SGM and Bruns, S and Wolterink, JM and Leiner, T and Viergever, MA and Verkooijen, HM and Isgum, I	Imaging/Dosiomics	Convolutional neural networks (CNNs)	Ensemble of 3D convolutional neural networks (CNNs) with dual-output architecture: (1) semantic segmentation of cardiac chambers and large vessels; (2) regression-based coronary artery localization using inverse-distance heatmaps	Not reported	Not reported	Not reported	Not reported	Not reported	Not reported	Not reported	Cardiac chambers Dmean 0.08–0.31 Gy; D5% 0.15–0.97 Gy; V1Gy 1–8%. Coronary arteries Dmean 0.11–0.61 Gy; D5% 0.14–2.81 Gy; V1Gy 6–7%.	ASSD 0.17–0.27 cm. 3D evaluation (5 scans): DSC 0.87–0.93; ASSD 0.07–0.10 cm. Coronary artery localization: Median overlap within 1.0 cm — LAD 98%, RCA 88%, LCX 80%; ASSD — LAD 0.37 cm, RCA 0.56 cm, LCX 0.51 cm. Dosimetric agreement: R² for Dmean 0.77–1.00 for chambers/vessels; 0.86–0.95 for coronary arteries.	Convolutional neural networks (CNNs)
AI-Based Radiation Dose Quantification for Estimation of Heart Disease Risk in Breast Cancer Survivors After Radiation Therapy	van Velzen, SGM and Gal, R and Teske, AJ and van der Leij, F and van den Bongard, DHJG and Viergever, MA and Verkooijen, HM and Isgum, I	Imaging/Dosiomics	Deep Learning (CNN) for autosegmentation and Linear regression for prediction.	ensemble of convolutional neural networks (CNN) Deep Learning	Not reported	Not reported	Not reported	Not reported	Not reported	Not reported	Not reported	Not reported	Dice similarity coefficients 0.76–0.88 for cardiac chambers and large arteries; coronary artery localization median overlap scores 0.80–0.91 with localization within 1.0 cm of reference.	Deep Learning (CNN) for autosegmentation and Linear regression for prediction.
Artificial Intelligence-Assisted Prediction of Late-Onset Cardiomyopathy Among Childhood Cancer Survivors.	Güntürkün F and Akbilgic O and Davis RL and Armstrong GT and Howell RM and Jefferies JL and Ness KK and Karabayir I and Lucas JT Jr and Srivastava DK and Hudson MM and Robison LL and Soliman EZ and Mulrooney DA	Prediction	Machine Learning and Deep Learning (Extreme Gradient Boosting [XGBoost], Convolutional Neural Networks [CNN], and Genetic Algorithms for feature selection)	Extreme Gradient Boosting (XGBoost) classifier using ECG-derived features selected via genetic algorithm; models evaluated using ECG-only, clinical-only, and combined ECG + clinical feature sets	ECG + clinical model: 0.89 (95% CI 0.86–0.91); ECG-only model: 0.87 (95% CI 0.83–0.90); Clinical-only model: 0.69 (95% CI 0.64–0.74)	ECG + clinical: 78%; ECG-only: 76%; Clinical-only: 62%	ECG + clinical: Specificity 81%; ECG-only: 79%; Clinical-only: 66%	ECG + clinical model: 81%	Not reported	Not reported	Not reported	Not reported	Validation: Five-fold stratified cross-validation. Predictive values (ECG + clinical): PPV 30%; NPV 97%. Subgroup performance: Similar AUC (≈0.88–0.89) for prediction at 0.5–5 years and 5–9 years post-baseline.	Machine Learning and Deep Learning (Extreme Gradient Boosting [XGBoost], Convolutional Neural Networks [CNN], and Genetic Algorithms for feature selection)
Artificial Intelligence-Based Patient Selection for Deep Inspiration Breath-Hold Breast Radiotherapy from Respiratory Signals	Vendrame, A and Cappelletto, C and Chiovati, P and Vinante, L and Parvej, M and Caroli, A and Pirrone, G and Barresi, L and Drigo, A and Avanzo, M	Patient Selection	Recurrent neural networks (RNN): Deep Bidirectional Long Short-Term Memory (BLSTM)	ML Classifier	0.694 (test dataset)	80.1% (test dataset)	66.7% (test dataset)	71.4% (test dataset)	72.4% (test dataset)	Not reported	Not reported	Not reported	Dataset: 36 left-sided breast cancer patients (60% training, 40% testing). Eligibility definition: Patients with reduction in maximum LAD dose (∆DL) greater than the cohort median (0.46 Gy) classified as eligible for DIBH. Network architecture: Two BLSTM layers with 100 neural units each, followed by dropout layers (20% dropout), fully connected layer, softmax, and classification layer; total of …	Recurrent neural networks (RNN): Deep Bidirectional Long Short-Term Memory (BLSTM)
Association between statin therapy dose intensity and radiation cardiotoxicity in non-small cell lung cancer: Results from the NI-HEART study.	Walls GM and O'Connor J and Harbinson M and McCarron EP and Duane F and McCann C and McKavanagh P and Johnston DI and Erekkath J and Giacometti V and Gavin AT and McAleese J and Hounsell AR and Cole AJ and Butterworth KT and McGarry CK and Hanna GG and Jain S	Imaging/Segmentation	Deep learning	Deep learning–based cardiac substructure autosegmentation used for dose extraction (cardiac chambers and great vessels); downstream analysis performed using Cox proportional hazards and Fine–Gray competing risk regression (no predictive ML classifier)	Not reported	Not reported	Not reported	Not reported	Not reported	Not reported	Not reported	Not reported	Overall survival (fully adjusted Cox model): Medium-intensity statins HR 0.70 (95% CI 0.51–0.97, p = 0.033); High-intensity statins HR 0.68 (95% CI 0.50–0.91, p = 0.012); Low-intensity statins HR 0.89 (95% CI 0.49–1.62, p = 0.709). Deaths: 340/478 (71%).	Deep learning
Association of cardiac calcium burden with overall survival after radiotherapy for non-small cell lung cancer	Haseltine, JM and Apte, A and Jackson, A and Yorke, E and Yu, AF and Plodkowski, A and Wu, A and Peleg, A and Al-Sadawi, M and Iocolano, M and Gelblum, D and Shaverdian, N and Simone , CB II and Rimner, A and Gomez, DR and Shepherd, AF and Thor, M	Imaging/Calcification	Deep learning	Deep learning–assisted plaque quantification pipeline: (1) DL-based auto-segmentation of pericardium and aorta; (2) HU-threshold–based calcium quantification (Agatston threshold >130 HU); (3) comparison with an external deep learning plaque estimator producing a categorical plaque score (0–3).	Not reported	Not reported	Not reported	Not reported	Not reported	Not reported	Not reported	Not reported	Median plaque volumes: Def-RT — PlaqueCoro 0.75 cm³, PlaqueCoro+Ao 0.87 cm³; PORT — PlaqueCoro 0.03 cm³, PlaqueCoro+Ao 0.52 cm³. Deep learning plaque estimator: categorical score 0–3 (median 2 in both cohorts); not associated with OS. Overall survival associations (Def-RT only): PlaqueCoro HR 1.11 per cm³ (95% CI 1.04–1.19; pFDR=0.008); PlaqueCoro+Ao HR 1.06 per cm³ (95% CI 1.02–1.11; pFDR=0.03).…	Deep learning
Automated contouring for breast cancer radiotherapy in the isocentric lateral decubitus position: a neural network-based solution for enhanced precision and efficiency	Loap, P and Monteil, R and Kirova, Y and Vu-Bezin, J	Imaging/Segmentation	Deep Learning	nnU-Net deep learning segmentation model (2D U-Net architecture) for automatic delineation of treated breast and organs at risk	Not reported	Not reported	Not reported	Not reported	Not reported	Not reported	Not reported	Not reported	DSC 0.87–0.92; contouring time ↓ >60%; Segmentation performance (validation cohort, mean DSC): Treated breast 0.88 (SD 0.04); heart 0.90 (SD 0.05); right lung 0.98 (SD 0.02); left lung 0.97 (SD 0.02). Hausdorff distance (mean): Breast 7.1 mm; heart 9.1 mm; right lung 6.0 mm; left lung 6.2 mm. Time efficiency: Automatic segmentation ≈4 min vs ≈20 min manual.	Deep Learning
Automated coronary artery calcium scoring in patients with breast cancer to assess the risk of heart disease following adjuvant radiation therapy.	Kim K and Chung SY and Oh C and Cho I and Kim KH and Byun HK and Yoon HI and Oh J and Chang JS	Imaging/Calcification	Deep learning	Deep learning–based automated coronary artery calcium (CAC) scoring algorithm (AVIEW-CAC) applied to non-ECG-gated CT (RT planning CT or PET-CT)	Not reported	Not reported	Not reported	Not reported	Not reported	Not reported	Not reported	Not reported	Agatston score correlation r >0.95; CAC prevalence: CAC >0 in 11.2% of RT cohort and 3.7% of no-RT cohort. Follow-up: Median 9.3 years. Primary outcome: Acute coronary events (ACE). 10-year ACE incidence: CAC >0 vs CAC = 0 → 6.7% vs 0.2% (P < 0.001). Multivariable Cox analysis: CAC >0 independently associated with ACE (HR 24, 95% CI 4.22–134, P < 0.001); mean heart dose (MHD) >3 Gy also significa…	Deep learning
Automatic Cardiac Structure Contouring for Small Datasets with Cascaded Deep Learning Models.	van den Oever LB and Spoor DS and Crijns APG and Vliegenthart R and Oudkerk M and Veldhuis RNJ and de Bock GH and van Ooijen PMA	Imaging/Segmentation	Deep Learning	Cascaded deep learning segmentation pipeline: Stage 1 InceptionResNetV2 classifier to identify CT slices containing cardiac structures; Stage 2 three parallel UNet3+ models (axial, coronal, sagittal) combined for final cardiac structure segmentation	Not reported	Not reported	Not reported	0.99	Not reported	Not reported	Not reported	Not reported	DSC 0.79–0.91; Stage 1 performance: Cohen’s κ = 0.98; confusion matrix showed 1 false positive and 2 false negatives in validation slices. Stage 2 segmentation (median [IQR]): Dice coefficient — Whole heart 0.96 (0.94–0.96); RV 0.88 (0.87–0.90); LV 0.92 (0.90–0.93); LA 0.82 (0.80–0.84); RA 0.80 (0.77–0.83).	Deep Learning
Automatic delineation of cardiac substructures using a region-based fully convolutional network.	Harms J and Lei Y and Tian S and McCall NS and Higgins KA and Bradley JD and Curran WJ and Liu T and Yang X	Imaging/Segmentation	Deep Learning (convolutional neural network (CNN))	Mask-scoring region-based fully convolutional neural network (MS-RCNN) with ResNet-50 backbone, region proposal network (RPN), attention gate, and mask-scoring head for simultaneous detection and segmentation of cardiac substructures	Not reported	Not reported	Not reported	Not reported	Not reported	Not reported	Not reported	Not reported	DSC 0.82–0.94; Segmentation performance – Dice similarity coefficient (mean ± SD, cross-validation): Whole heart 0.96 ± 0.03; Chambers 0.94 ± 0.04; Great vessels 0.93 ± 0.04; Coronary arteries 0.66 ± 0.17; Valves 0.77 ± 0.15. Comparison (3D U-Net DSC): Whole heart 0.92; Chambers 0.87; Great vessels 0.88; Coronary arteries 0.48; Valves 0.59. Mean surface distance (mm, proposed): Heart 1.36 ± 1.32;…	Deep Learning (convolutional neural network (CNN))
Automatic quantification of calcifications in the coronary arteries and thoracic aorta on radiotherapy planning CT scans of Western and Asian breast cancer patients	Gernaat, SAM and van Velzen, SGM and Koh, V and Emaus, MJ and Isgum, I and Lessmann, N and Moes, S and Jacobson, A and Tan, PW and Grobbee, DE and van den Bongard, DHJ and Tang, JI and Verkooijen, HM	Imaging/Calcification	Deep Learning (convolutional neural network (CNN))	Deep learning–based automated calcification quantification pipeline using two consecutive convolutional neural networks (CNNs) for voxel-level calcium detection and anatomical labeling (LAD, LCX, RCA, thoracic aorta), followed by HU-threshold–based lesion aggregation	Not reported	Not reported	Not reported	Not reported	Not reported	Not reported	Not reported	Not reported	ICC >0.90 vs expert scoring; Calcification metrics: Prevalence: CAC present in 24.2% (NL) vs 17.3% (SG); TAC present in 73.0% (NL) vs 62.2% (SG).	Deep Learning (convolutional neural network (CNN))
Automatic segmentation of cardiac structures can change the way we evaluate dose limits for radiotherapy in the left breast	Borges, MG and Gruenwaldt, J and Barsanelli, DM and Ishikawa, KE and Stuart, SR	Imaging/Segmentation	Deep learning (CNN) for autosegmentation and Linear regression for DVH	Automatic segmentation using deep learning–based tools: TotalSegmentator (CNN-based multi-organ segmentation) and Limbus AI (radiotherapy-specific AI contouring).	Not reported	Not reported	Not reported	Not reported	Not reported	Not reported	Not reported	Not reported	Auto-segmented structures: LAD, heart (cardiac muscle), cardiac area (RTOG-defined), left/right ventricles, left/right atria, aorta, left lung, left breast. Mean doses (mean ± SD, cGy): LAD 1869.2 ± 745.2; Heart 533.1 ± 181.4; Left ventricle 320.1 ± 112.4; Cardiac area 237.7 ± 77.1; Right ventricle 224.4 ± 75.0; Aorta 59.6 ± 78.9; Left atrium 46.2 ± 26.4; Right atrium 41.4 ± 27.4.	Deep learning (CNN) for autosegmentation and Linear regression for DVH
Baseline atrial volume indices and major adverse cardiac events following thoracic radiotherapy	Qiao, EM and He, JH and Silos, KD and Gasho, JO and Belen, P and Bitterman, DS and Mckenzie, E and Steers, J and Guthier, C and Nohria, A and Lu, MT and Aerts, HJWL and Nikolova, AP and Mak, RH and Atkins, KM	Prediction	Extreme Gradient Boosting (XGBoost)	Extreme Gradient Boosting (XGBoost) tree-based machine learning model for feature discovery, followed by Fine–Gray competing-risk regression for risk estimation	0.71 (discovery cohort)	Not reported	Not reported	Not reported	Not reported	Not reported	Not reported	Not reported	Top ML-identified predictors: Right atrial volume index (RAVI, most important feature), lung V55Gy, history of coronary heart disease, heart volume, left atrial volume index (LAVI). Risk associations (adjusted competing-risk models): Each 1 ml/m² increase in RAVI associated with increased MACE risk (discovery: sHR 1.02, 95% CI 1.00–1.04, p = 0.03; NSCLC validation: sHR 1.05, 95% CI 1.00–1.11, p =…	Extreme Gradient Boosting (XGBoost)
Bragatston study protocol: a multicentre cohort study on automated quantification of cardiovascular calcifications on radiotherapy planning CT scans for cardiovascular risk prediction in patients with breast cancer.	Emaus MJ and Išgum I and van Velzen SGM and van den Bongard HJGD and Gernaat SAM and Lessmann N and Sattler MGA and Teske AJ and Penninkhof J and Meijer H and Pignol JP and Verkooijen HM	Imaging/Calcification	Deep Learning	Two-stage convolutional neural network (CNN)–based deep learning algorithm for automated quantification of cardiovascular calcifications (coronary arteries, thoracic aorta, aortic valve, mitral valve) on radiotherapy planning CT scans	Not reported	Not reported	Not reported	Not reported	Not reported	Not reported	Not reported	Not reported	Reproducibility of automatic vs manual calcium scoring (prior validation cited): linearly weighted Cohen’s κ ≥ 0.84; intraclass correlation coefficients (ICC) ≥ 0.94. Anatomical targets: left main, LAD, LCX, RCA, thoracic aorta, aortic valve, mitral valve.	Deep Learning
Cardiac Substructure Dose and Survival in Stereotactic Radiotherapy for Lung Cancer: Results of the Multi-Centre SSBROC Trial	Chin, V and Chlap, P and Finnegan, R and Hau, E and Ong, A and Ma, X and Descallar, J and Otton, J and Holloway, L and Delaney, GP and Vinod, SK	Imaging/Segmentation/Dosiomics	Deep learning	Hybrid deep learning–based automatic cardiac substructure segmentation tool (deep learning + multi-atlas mapping + geometric modeling); machine learning feature-selection using minimum redundancy–maximum relevance (MRMR)	Not reported	Not reported	Not reported	Not reported	Not reported	Not reported	Not reported	Not reported	Segmentation: Fully automated delineation of 18 cardiac structures (whole heart, chambers, great vessels, coronary arteries, valves, conduction nodes). ML analysis: MRMR selected 10 cardiac dose parameters for multivariable modeling. Multivariable Cox results: Male sex (HR 2.04, 95% CI 1.06–3.90, p = 0.03) and maximum dose to ascending aorta (HR 1.05 per Gy, 95% CI 1.01–1.10, p = 0.02) independen…	Deep learning
Cardiac substructure segmentation with deep learning for improved cardiac sparing.	Morris ED and Ghanem AI and Dong M and Pantelic MV and Walker EM and Glide-Hurst CK	Imaging/Segmentation	Deep Learning	3D U-Net convolutional neural network for automatic cardiac substructure segmentation; trained using paired cardiac MRI–CT data with CT-only inference	Not reported	Not reported	Not reported	Not reported	Not reported	Not reported	Not reported	Not reported	DSC 0.80–0.92; Segmentation performance (mean Dice similarity coefficient): Cardiac chambers 0.88; great vessels 0.85; pulmonary veins 0.77; coronary arteries 0.50. Mean surface distance: <2 mm for chambers and great vessels.	Deep Learning
Cardiopulmonary Substructure Doses are Not Correlated With Cardiorespiratory Fitness Among Breast Cancer Survivors Treated With Contemporary Radiation Therapy	Thor, M and Scott, JM and Reiner, AS and Hong, LD and Yu, AF and Apte, A and Mccormick, B and Perez-Andujar, A and Lee, CP and Cervino, L and Harrison, J and Liang, XL and Patel, P and Dauer, LT and Moskowitz, CS and Bernstein, JL	Imaging/Dosiomics	Convolutional neural networks (CNNs)	Convolutional neural network–based AI auto-segmentation model for cardiopulmonary substructures (applied to dose extraction)	Not reported	Not reported	Not reported	Not reported	Not reported	Not reported	Not reported	Not reported	AI segmentation: 9 cardiopulmonary substructures (heart, LA, RA, LV, RV, pulmonary artery, superior vena cava, inferior vena cava, aorta) plus contralateral and ipsilateral lungs. Dose metrics: Median mean heart dose (MHD) 0.64 Gy (range 0.12–7.1); highest substructure mean dose to left ventricle (median 0.88 Gy).	Convolutional neural networks (CNNs)
Clinical Feasibility of Artificial Intelligence-Based Autosegmentation of the Left Anterior Descending Artery in Radiotherapy for Breast Cancer	Mohan, A and Talapatra, K and Sankhe, M and Kiron, G and Maniar, P and Kolekar, A and Kushe, S and Kharote, P and Singh, A and Patel, K and Gupta, A and Patel, D and Bardeskar, N and Patkar, D	Imaging/Segmentation	Deep Learning	Evaluation of AI-based LAD artery autosegmentation approaches, including segmentation algorithms (edge detection, point detection), multi-atlas–based approach, extrapolation-based approach, and anatomical landmark–based deep learning approach	Not reported	Not reported	Not reported	Not reported	Not reported	Not reported	Not reported	Not reported	LAD DSC 0.74–0.88; Edge detection performance: Sobel edge detection failed to identify LAD features in 98% of CT slices. Anatomical landmark–based approach (cited prior work): Dice similarity coefficient 0.15, median centroid distance 3.9 mm, maximum Hausdorff distance 4.8 mm.	Deep Learning
Combining dosiomics and machine learning methods for predicting severe cardiac diseases in childhood cancer survivors: the French Childhood Cancer Survivor Study	Bentriou, M and Letort, V and Chounta, S and Fresneau, B and Do, D and Haddy, N and Diallo, I and Journy, N and Zidane, M and Charrier, T and Aba, N and Ducos, C and Zossou, VS and de Vathaire, F and Allodji, RS and Lemler, S	Prediction	Random survival forests (RSF), Cox proportional hazards with Lasso/Bootstrap Lasso	Survival analysis models including Cox Proportional Hazards, Cox PH with Lasso penalty, Cox PH with Bootstrap Lasso feature selection, and Random Survival Forests (RSF)	0.72–0.78	Not reported	Not reported	Not reported	Not reported	Not reported	Not reported	Not reported	Feature importance: V30, mean heart dose; Best C-index: RSF with screened first-order dosiomics (whole heart) IPCW C-index 0.792 ± 0.049. Best Integrated Brier Score: RSF with first-order dosiomics from heart subparts IBS 0.069 ± 0.050. Comparator (standard models): Cox PH with mean heart dose IPCW C-index 0.774 ± 0.034; IBS 0.074 ± 0.056; Cox PH with dose–volume indicators IPCW C-index 0.791 ± 0…	Random survival forests (RSF), Cox proportional hazards with Lasso/Bootstrap Lasso
Deep Learning for Automatic Calcium Scoring in CT: Validation Using Multiple Cardiac CT and Chest CT Protocols.	van Velzen SGM and Lessmann N and Velthuis BK and Bank IEM and van den Bongard DHJG and Leiner T and de Jong PA and Veldhuis WB and Correa A and Terry JG and Carr JJ and Viergever MA and Verkooijen HM and Išgum I	Imaging/Calcification	Deep Learning (convolutional neural network (CNN))	Two-stage convolutional neural network (CNN) pipeline for calcium scoring	Not reported	CAC CT baseline sensitivity 87% (95% CI 85–91); RadTherapy CT baseline sensitivity 75% (95% CI 72–78); protocol-specific and combined training sensitivities ranged 82–98% depending on structure and CT type	Not reported	RadTherapy CT 97–98%; CAC CT 96–99% depending on training strategy; ACPET CT 38–72% depending on training strategy	Not reported	Not reported	Not reported	Not reported	ICC for CAC (baseline training): 0.79–0.97 across CT types. ICC for TAC (baseline training): 0.66–0.98. ICC after protocol-specific training: CAC 0.84–0.99; TAC 0.92–0.99. ICC after combined training: CAC 0.85–0.99; TAC 0.96–0.99. Risk-category agreement: Linearly weighted κ 0.85–0.95 (baseline), 0.89–0.98 (protocol-specific), 0.89–0.97 (combined); overall κ 0.90–0.92.	Deep Learning (convolutional neural network (CNN))
Deep learning model for automatic contouring of cardiovascular substructures on radiotherapy planning CT images: Dosimetric validation and reader study based clinical acceptability testing.	Garrett Fernandes M and Bussink J and Stam B and Wijsman R and Schinagl DAX and Monshouwer R and Teuwen J	Imaging/Segmentation	Neural network	3D deep learning U-Net–based segmentation	Not reported	Not reported	Not reported	Not reported	Not reported	Not reported	Not reported	Mean absolute difference (mean dose): median 0.45 Gy averaged over all cardiovascular structures	DSC 0.82–0.91; Geometric accuracy (median surface Dice at 3 mm tolerance, entire test set): Mean across structures 0.90; HT 0.94; LV 0.88; RV 0.88; LA 0.87; RA 0.87; AO 0.99; PA 0.96; SVC 0.93; IVC 0.82. Contrast effect: Median mean surface Dice 0.91 (contrast-enhanced) vs 0.75 (non-contrast). DVH MAE (%): HT 0.48; LV 0.56; RV 1.64; LA 2.02; RA 1.43; AO 0.48; PA 1.09; SVC 1.49; IVC 2.79.	Neural network
Deep learning-based automatic segmentation of cardiac substructures for lung cancers.	Chen X and Mumme RP and Corrigan KL and Mukai-Sasaki Y and Koutroumpakis E and Palaskas NL and Nguyen CM and Zhao Y and Huang K and Yu C and Xu T and Daniel A and Balter PA and Zhang X and Niedzielski JS and Shete SS and Deswal A and Court LE and Liao Z and Yang J	Imaging/Segmentation	Deep Learning (U-Net)	nnU-Net deep learning segmentation model	Not reported	Not reported	Not reported	Not reported	Not reported	Not reported	Not reported	Not reported	Dice similarity coefficient (DSC): whole heart 0.95 ± 0.01; chambers 0.91 ± 0.02; great vessels 0.86 ± 0.09; valves 0.81 ± 0.09; coronary arteries 0.60 ± 0.14. Mean surface distance (MSD): LAD 1.4 ± 0.7 mm. Average absolute dose error: mean dose 1.04 ± 1.99 Gy; max dose 2.20 ± 4.37 Gy.	Deep Learning (U-Net)
Deep-learning system to improve the quality and efficiency of volumetric heart segmentation for breast cancer	Zeleznik, R and Weiss, J and Taron, J and Guthier, C and Bitterman, DS and Hancox, C and Kann, BH and Kim, DW and Punglia, RS and Bredfeldt, J and Foldyna, B and Eslami, P and Lu, MC and Hoffmann, U and Mak, R and Aerts, HJWL	Imaging/Segmentation	Deep Learning	Two-stage 3D U-Net deep-learning segmentation system	Not reported	Not reported	Not reported	Not reported	Not reported	Not reported	Not reported	Not reported	Median Dice coefficient 0.95 (IQR 0.008) on testing data; expert comparison: manual Dice 0.95 vs AI-assisted 0.97 (p < 0.001); expert accuracy unchanged with AI (Dice 0.92 vs 0.92, p = 0.48); AI-only Dice 0.92; real-world validation across 5,677 patients showed Dice 0.89 (IQR 0.06); failure rate (Dice < 0.85) decreased from 46.7% (2008) to 5.6% (2018); segmentation time reduced from 4.0 min (IQR …	Deep Learning
Development and application of an elastic net logistic regression model to investigate the impact of cardiac substructure dose on radiation-induced pericardial effusion in patients with NSCLC	Niedzielski, JS and Wei, X and Xu, T and Gomez, DR and Liao, ZX and Bankson, JA and Lai, SPY and Court, LE and Yang, JZ	Prediction/Dosiomics	Regression model	Elastic net logistic regression	0.820 (cross-validated model with heart + substructures); 0.879 (final fitted model)	Not reported	Not reported	0.743 (cross-validated heart + substructures model); 0.801 (final fitted model)	Not reported	Calibration slope/intercept: 1.356 / 0.235 (cross-validated heart + substructures model); 1.352 / 0.174 (final fitted model)	Not reported	Not reported	Whole-heart + substructure model outperformed heart-only model across all metrics: AUC 0.820 vs 0.799; accuracy 0.743 vs 0.713; calibration slope 1.356 vs 2.456; calibration intercept 0.235 vs 0.729 (all p < 0.05).	Regression model
Development and Validation of a Prediction Model for Cardiac Events in Patients With Hepatocellular Carcinoma Undergoing Stereotactic Body Radiation Therapy	Lee, HI and Son, J and Cho, B and Goh, Y and Jung, J and Park, JH and Chie, EK and Kim, KS and Kim, YH and Kang, HC and Yoon, SM	Prediction	Logistic regression for prediction, deep-learning for segmentation	Multivariable logistic regression–based normal tissue complication probability (NTCP) model; simplified Cardiac Event Index (CEI) risk score	0.770 (development cohort, CEI for MACEs); 0.809 (validation cohort, CEI for MACEs); 0.750 (development cohort, coronary artery disease); 0.793 (validation cohort, coronary artery disease)	97.7% (low-risk group, development cohort, MACE exclusion); 96.4% (low-risk group, validation cohort, MACE exclusion)	89.3% (high-risk group, development cohort, MACE prediction); 85.0% (high-risk group, validation cohort, MACE prediction)	Not reported	Not reported	Hosmer–Lemeshow test P = 0.565 (development cohort, CEI); P = 0.800 (validation cohort, CEI)	Not reported	Not reported	MACE incidence: 5.8% (86/1473) development cohort; 6.7% (28/420) validation cohort. CEI stratified patients into low-, intermediate-, and high-risk groups with MACE rates of 0.4%, 4.9%, and 22.8% (development cohort) and 0.8%, 4.1%, and 23.4% (validation cohort).	Logistic regression for prediction, deep-learning for segmentation
Development of deep learning chest X-ray model for cardiac dose prediction in left-sided breast cancer radiotherapy	Koide, Y and Aoyama, T and Shimizu, H and Kitagawa, T and Miyauchi, R and Tachibana, H and Kodaira, T	Prediction	Convolutional neural network (CNN). + regression model	Convolutional neural network (CNN)–based regression model using paired anteroposterior and lateral chest X-ray images with clinical covariates	0.864 (binary classification of ΔMHD > 1 Gy)	0.857	0.909	0.88	Not reported	Not reported	0.73 Gy (ΔMHD prediction)	0.56 Gy (ΔMHD prediction)	Positive predictive value 92.3%; negative predictive value 83.3%; Pearson correlation between observed and predicted ΔMHD = 0.55 (P = 0.028); R² = 0.30; median absolute residual 0.39 Gy (IQR 0.22–0.72); for MHDFB prediction: median absolute error 0.72 Gy, correlation 0.46 (P = 0.02), sensitivity 0.58, specificity 0.77.	Convolutional neural network (CNN). + regression model
Development of learning-based predictive models for radiation-induced atrial fibrillation in non-small cell lung cancer patients by integrating patient-specific clinical, dosimetry, and diagnostic information	Yoo, SK and Kim, KH and Noh, JM and Oh, J and Yang, G and Kim, J and Kim, N and Kim, H and Yoon, HI	Prediction	LASSO for feature selection, Logistic regression ; hybrid deep learning model, multilayer perceptron (MLP), convolutional neural network (CNN), recurrent network (RNN), vision transformer for prediction network (CNN) [25], recurrent neural network (RNN) [26], or vision transformer [27])	Machine learning model (LASSO + PCA + logistic regression with intervention) and hybrid deep learning model (MLP + BiLSTM + logistic regression)	Internal validation: 0.801 (machine learning with intervention), 0.817 (deep learning with calibration); External validation: 0.776 (machine learning with intervention), 0.806 (deep learning)	Internal validation: 81.67% (machine learning with intervention), 83.33% (deep learning with calibration); External validation: 83.33% (machine learning with intervention), 83.33% (deep learning)	Internal validation: 78.33% (machine learning with intervention), 80.00% (deep learning with calibration); External validation: 71.82% (machine learning with intervention), 77.90% (deep learning)	Internal validation: 80.01% (machine learning with intervention), 81.66% (deep learning with calibration); External validation: 72.19% (machine learning with intervention), 78.08% (deep learning)	Not reported	Temperature scaling applied to deep learning model in internal validation; post-calibration AUC = 0.817	Not reported	Not reported	Machine learning without intervention showed lower internal AUC = 0.767 and external AUC = 0.665. Hybrid deep learning preserved performance across datasets with minimal AUC degradation (internal 0.817 → external 0.806). Class imbalance addressed using SMOTE; AF incidence 17/321 (internal) and 6/187 (external).	LASSO for feature selection, Logistic regression ; hybrid deep learning model, multilayer perceptron (MLP), convolutional neural network (CNN), recurrent network (RNN), vision transformer for prediction network (CNN) [25], recurrent neural network (RNN) [26], or vision transformer [27])
Dosimetric Planning Tradeoffs to Reduce Heart Dose Using Machine Learning-Guided Decision Support Software in Patients with Lung Cancer	Bitterman, DS and Selesnick, P and Bredfeldt, J and Williams, CL and Guthier, C and Huynh, E and Kozono, DE and Lewis, JH and Cormack, RA and Carpenter, CM and Mak, RH and Atkins, KM	Prediction/Dosiomics	machine learning-guided clinical decision support software (Classification models: Boosting framework, decision trees and regression learning)	Machine learning–guided clinical decision support system using boosted decision-tree classification models for radiotherapy plan matching	Not reported	Not reported	Not reported	Not reported	Not reported	Not reported	Not reported	Not reported	Predicted MHD reductions >4–8 Gy in 39.2% of plans (modality-independent). Switching from 3D-CRT to IMRT: 75/103 patients (72.8%) showed improved MHD with mean reduction of 2.0 Gy (P < .0001); 25% achieved >4 Gy reduction.	machine learning-guided clinical decision support software (Classification models: Boosting framework, decision trees and regression learning)
Dosiomics-Based Prediction of Radiation-Induced Valvulopathy after Childhood Cancer	Chounta, S and Allodji, R and Vakalopoulou, M and Bentriou, M and Do, DT and De Vathaire, F and Diallo, I and Fresneau, B and Charrier, T and Zossou, V and Christodoulidis, S and Lemler, S and Le Chevalier, VL	Prediction/Dosiomics	Random forest algorithms	Random forest classification models (weighted Random Forest and Balanced Random Forest)	Entire cohort (FCCSS): 0.77 ± 0.047 (wtRF, dosiomics); 0.77 ± 0.051 (BRF, dosiomics). Uniformity < 1 sub-cohort: 0.86 ± 0.059 (wtRF); 0.86 ± 0.057 (BRF). Uniformity < 0.1 sub-cohort: 0.82 ± 0.073 (wtRF); 0.80 ± 0.071 (BRF).	Entire cohort: 0.59 ± 0.075 (wtRF); 0.62 ± 0.074 (BRF). Uniformity < 1: 0.73 ± 0.126 (wtRF); 0.78 ± 0.113 (BRF). Uniformity < 0.1: 0.69 ± 0.13 (wtRF); 0.74 ± 0.126 (BRF).	Entire cohort: 0.88 ± 0.015 (wtRF); 0.86 ± 0.018 (BRF). Uniformity < 1: 0.83 ± 0.031 (wtRF); 0.79 ± 0.021 (BRF). Uniformity < 0.1: 0.82 ± 0.026 (wtRF); 0.77 ± 0.028 (BRF).	Not reported	Not reported	Not reported	Not reported	Not reported	Balanced Accuracy: Entire cohort: 0.74 ± 0.038 (wtRF); 0.74 ± 0.039 (BRF). Uniformity < 1: 0.78 ± 0.057 (wtRF); 0.79 ± 0.056 (BRF). Uniformity < 0.1: 0.76 ± 0.062 (wtRF); 0.75 ± 0.056 (BRF).	Random forest algorithms
Effect of Radiation Doses to the Heart on Survival for Stereotactic Ablative Radiotherapy for Early-stage Non-Small-cell Lung Cancer: An Artificial Neural Network Approach	Chan, ST and Ruan, D and Shaverdian, N and Raghavan, G and Cao, M and Lee, P	Prediction/Dosiomics	Neural Network	Artificial neural network (ANN) survival classification model	Not reported	Not reported	Not reported	0.647	Not reported	Not reported	Not reported	Not reported	Overall survival (binary classification). Input features: Maximum dose, mean dose, V10Gy, V25Gy, V50Gy for 15 cardiac substructures and whole heart, plus clinical timing variables. Train/validation/test: 95 patients for training/validation (Monte Carlo cross-validation); 17-patient independent test set.	Neural Network
Elevated Coronary Artery Calcium Quantified by a Validated Deep Learning Model From Lung Cancer Radiotherapy Planning Scans Predicts Mortality	Atkins, KM and Weiss, J and Zeleznik, R and Bitterman, DS and Chaunzwa, TL and Huynh, E and Guthier, C and Kozono, DE and Lewis, JH and Tamarappoo, BK and Nohria, A and Hoffmann, U and Aerts, HJWL and Mak, RH	Imaging/Calcification	Deep Learning	Deep learning convolutional neural network (CNN) for automatic coronary artery calcium (CAC) quantification; model composed of three consecutive DL segmentation networks	Not reported	Not reported	Not reported	Not reported	Not reported	Not reported	Not reported	Not reported	Adjusted hazard ratio for all-cause mortality (DL-CAC ≥1 vs DL-CAC = 0) = 1.51 (95% CI 1.01–2.26, P=0.04); AI output: Agatston-like DL-CAC score; Distribution: DL-CAC ≥1 in 61.5% (263/428). Primary outcome: All-cause mortality (ACM). Secondary outcome: Major adverse cardiac events (MACE). Adjusted Cox regression (ACM): DL-CAC ≥1 vs 0 → HR 1.51 (95% CI 1.01–2.26; P = .04); 2-year ACM: 56.2% (DL-CA…	Deep Learning
Enhanced cardiac substructure sparing through knowledge-based treatment planning for non-small cell lung cancer radiotherapy	Momin, S and Wolf, J and Roper, J and Lei, Y and Liu, T and Bradley, JD and Higgins, K and Yang, XF and Zhang, JH	Prediction/Dosiomics	AI based Knowledge-based planning (KBP) model (RapidPlan: ML and DL KBP))	Knowledge-based treatment planning (KBP) model implemented in Varian RapidPlan™; two models evaluated: Cardiac-based KBP (C-KBP) using whole heart only, and Cardiac-substructure-based KBP (CS-KBP) using 15 manually contoured cardiac substructures	Not reported	Not reported	Not reported	Not reported	Not reported	Not reported	Not reported	Not reported	LAD V15 Gy: CS-KBP = 0.69 ± 1.57 cc vs. C-KBP = 1.05 ± 1.68 cc vs. clinical/manual = 1.23 ± 1.76 cc (p < 0.01); Primary evaluation: Dosimetric comparison using paired two-tailed t-tests (p < 0.05). Key coronary artery results (mean ± SD): LADA mean dose 9.02 ± ? Gy (CS-KBP) vs 12.88 Gy (C-KBP) vs 16.05 Gy (clinical); LADA V15 Gy 0.69 ± 1.57 cc (CS-KBP) vs 1.05 ± 1.68 cc (C-KBP) vs 1.23 ± 1.76 cc …	AI based Knowledge-based planning (KBP) model (RapidPlan: ML and DL KBP))
Estimating the risk of major adverse cardiac events following radiotherapy for left breast cancer using a modified generalized Lyman normal-tissue complication probability model.	Lai TY and Hu YW and Wang TH and Chen JP and Shiau CY and Huang PI and Lai IC and Liu YM and Huang CC and Tseng LM and Huang N and Liu CJ	Prediction	Regression model	Modified generalized Lyman normal-tissue complication probability (NTCP) model incorporating equivalent uniform dose (EUD) of the left ventricle (LV), clinical risk factors, and time-to-event (censoring) via mixture/generalized Lyman modeling; fitted using maximum likelihood estimation (MLE)	Not reported	Not reported	Not reported	Not reported	Not reported	Not reported	Not reported	Not reported	Higher mean LV dose in affected individuals (4.1 Gy vs. 2.9 Gy); model parameters: D50 = 43.3 Gy, m = 0.59, n = 0.78; Best-fit parameters (full model): D50 = 43.3 Gy (95% CI 27.9–92.3), m = 0.59 (95% CI 0.53–0.65), n = 0.78 (95% CI 0.48–8.4). Standard Lyman (no clinical factors): D50 = 30.0 Gy, m = 0.71, n = 0.74. Clinical factors included in full model: age, BMI, diabetes, hypertension, heart di…	Regression model
Estimation of heart dose in left breast cancer radiotherapy: Assessment of vDIBH feasibility using the supervised machine learning algorithm	Rajurkar, SA and Verma, T and Gupta, R	Prediction/Dosiomics	Regression model	Supervised machine learning – Linear Regression model implemented using Scikit-learn; polynomial feature function applied; model developed to predict mean heart dose (HMD) from Haller Index (HI) and maximum heart distance (MHD)	Not reported	0.66	Specificity: 0.66 • Precision: 0.88	0.76	Not reported	Not reported	Not reported	Not reported	Inputs: Chest transverse diameter (A), sternum-to-vertebra distance (B); Haller Index = A/B. Outcome: Mean heart dose (HMD, cGy). Training/testing split: 70–80% training / 20–30% testing (HI→HMD); 80/20 for HMD→MHD. Observed vs predicted HMD (test set): Mean observed 468.76 cGy vs predicted 464.66 cGy (absolute difference 4 cGy). Paired t-test: t = 0.230; p = 0.819 (no significant difference). Co…	Regression model
Evaluating coronary arteries and predicting MACEs using CCTA in lung cancer patients receiving chemotherapy or chemoradiotherapy	Xie, YH and Shen, HS and Xu, Q and Tu, CR and Yang, R and Liu, T and Tang, H and Miao, ZM and Zhang, JQ	Prediction	Deep Learning (U-Net)	Deep learning–based coronary analysis software (CoronaryDoc / CACScoreDoc / CT-FFR / FAI modules, Shukun Technology) using U-Net–based segmentation and hybrid computational fluid dynamics (CFD) for CT-FFR estimation; downstream risk modeling via Cox proportional hazards regression	Not reported	Not reported	Not reported	Not reported	Not reported	Not reported	Not reported	Not reported	Key predictive variables: CT-FFR, fat attenuation index (FAI), CAC score, stenosis severity, CAD-RADS.; AI-derived parameters: Coronary artery calcium (CAC) score, plaque type, stenosis severity, CAD-RADS, CT-FFR, fat attenuation index (FAI) for LAD, LCX, RCA. Baseline differences vs controls: Higher CAC, higher CAD-RADS, more severe stenosis, lower CT-FFR, higher FAI (all P<0.05). Longitudinal c…	Deep Learning (U-Net)
Evaluation of a delineation software for cardiac atlas-based autosegmentation: An example of the use of artificial intelligence in modern radiotherapy	Loap, P and Tkatchenko, N and Kirova, Y	Imaging/Segmentation	Deep Learning	Atlas-based cardiac substructure autosegmentation software (Workflow Box, Mirada Medical) using deformable image registration (Lucas–Kanade method)	Not reported	Not reported	Not reported	Not reported	Not reported	Not reported	Not reported	Not reported	Dice similarity coefficient (median [min–max]): Whole heart 0.95 [0.83–0.97]; RA 0.78 [0.55–0.85]; LA 0.79 [0.68–0.85]; RV 0.76 [0.50–0.85]; LV 0.87 [0.59–0.92]; LV anterior wall 0.56 [0.14–0.72]; apical wall 0.34 [0.03–0.69]; inferior wall 0.38 [0.04–0.66]; lateral wall 0.70 [0.22–0.77]; septal wall 0.40 [0.01–0.68] (Table 1). Median DSC across substructures: 0.69.	Deep Learning
Explainable Artificial Intelligence to Identify Dosimetric Predictors of Toxicity in Patients with Locally Advanced Non-Small Cell Lung Cancer: A Secondary Analysis of RTOG 0617	Ladbury, C and Li, RC and Danesharasteh, A and Ertem, Z and Tam, A and Liu, JS and Hao, CR and Li, RS and McGee, H and Sampath, S and Williams, T and Glaser, S and Khasawneh, M and Liao, ZX and Lee, P and Ryckman, J and Shaikh, P and Amini, A	Prediction/Dosiomics	Multiple supervised ML classification models: logistic regression, naïve Bayes, k-nearest neighbors, support vector machine, random forest, and extreme gradient boosting (XGBoost); explainability via SHAP (Shapley Additive Explanation)	Multiple supervised ML classification models: logistic regression, naïve Bayes, k-nearest neighbors, support vector machine, random forest, and extreme gradient boosting (XGBoost); explainability via SHAP (Shapley Additive Explanation)	Pulmonary toxicity (XGBoost): 0.739; Cardiac toxicity (Random Forest): 0.706; Esophageal toxicity (Naive Bayes): 0.721	Not reported	Not reported	Not reported	Not reported	Not reported	Not reported	Not reported	Key dosimetric thresholds identified via SHAP and validated: Pulmonary—Mean lung dose > 18 Gy (ML OR 2.070; 95% CI 1.508–2.967), Lung V20 > 37% (ML OR 22.268; 95% CI 12.575–37.199); Esophageal—Mean esophagus dose > 34 Gy (ML OR 1.159; 95% CI 1.092–1.249), Esophagus V20 > 37% (ML OR 1.072; 95% CI 1.022–1.132).	Machine learning models (extreme gradient boosting, random forest, naive Bayes) with explainable AI (SHAP)
Factors impacting cardiac dose and overall survival in post-operative non-small cell lung cancer patients	Cruz-Chamorro, R and Bryant, JM and Henning, J and Robinson, LA and Lee, DH and Fontaine, J and Toloza, E and Rosenberg, SA and Kim, J and El Naqa, I and Dilling, TJ	Prediction/Dosiomics	Regression model	Elastic net survival regression model (regularized Cox proportional hazards framework) with Bayesian hyperparameter tuning; variable importance analysis performed	Not reported	Not reported	Not reported	Not reported	Not reported	Not reported	Not reported	Not reported	Dosimetric variables evaluated: Heart V5–V70, mean dose, D0.03cc; lung and esophagus DVHs. Univariable OS predictors (heart): Heart V30 (p=0.0207), V40 (p=0.0331), V50 (p=0.00624), mean heart dose (p=0.0197). Clinical predictors (univariable): ITV volume (p=0.0172), ITV/lung volume ratio (p=0.0031), heart volume (p=0.0165). Multivariable modeling: Elastic net with 80/20 train–validation split, 10…	Regression model
Identification of Risk of Cardiovascular Disease by Automatic Quantification of Coronary Artery Calcifications on Radiotherapy Planning CT Scans in Patients With Breast Cancer.	Gal R and van Velzen SGM and Hooning MJ and Emaus MJ and van der Leij F and Gregorowitsch ML and Blezer ELA and Gernaat SAM and Lessmann N and Sattler MGA and Leiner T and de Jong PA and Teske AJ and Verloop J and Penninkhof JJ and Vaartjes I and Meijer H and van Tol-Geerdink JJ and Pignol JP and van den Bongard DHJG and Išgum I and Verkooijen HM	Imaging/Calcification	Deep Learning	Deep learning–based automatic coronary artery calcium (CAC) quantification algorithm applied to non–ECG-gated radiotherapy planning CT scans; CAC used as exposure variable in Cox proportional hazards models	Not reported	Not reported	Not reported	Not reported	Not reported	Not reported	Not reported	Not reported	Strong dose–response relationships are demonstrated, particularly for coronary artery disease, with HRCAC>400 reaching 7.8.;AI task: Automatic detection and quantification of coronary calcifications; reproducibility vs manual scoring previously reported (weighted κ 0.91, ICC 0.85). CAC categorization (Agatston units): 0 (70.2%); 1–10 (10.0%); 11–100 (11.5%); 101–400 (5.2%); >400 (3.1%). Adjusted …	Deep Learning
Implementation of a Commercial Deep Learning-Based Auto Segmentation Software in Radiotherapy: Evaluation of Effectiveness and Impact on Workflow	Radici, L and Ferrario, S and Borca, VC and Cante, D and Paolini, M and Piva, C and Baratto, L and Franco, P and La Porta, MR	Imaging/Segmentation	Deep Learning (U-Net)	Commercial deep learning–based auto-segmentation software (Limbus Contour v1.5.0) using structure-specific U-Net convolutional neural network models	Not reported	Not reported	Not reported	Not reported	Not reported	Not reported	Not reported	Not reported	Average Dice Similarity Coefficient (DSC) across all structures = 0.72. Highest DSC: lungs 0.99; Good DSC (>0.9): bladder, heart, femoral heads; Lowest DSC: penile bulb 0.39. Volume variation (structures >15 cm³): smallest for lungs (~1%); largest for bowel (~65%) and oral cavity (~32%). Center of mass shift: smallest for lungs (≈0 cm); largest for bowel (2.4 cm). Dosimetric analysis: DVH differe…	Deep Learning (U-Net)
Incorporating sensitive cardiac substructure sparing into radiation therapy planning.	Morris ED and Aldridge K and Ghanem AI and Zhu S and Glide-Hurst CK	Imaging/Segmentation	Deep Learning (U-Net)	Deep learning–based segmentation model: 3D U-Net convolutional neural network	Not reported	Not reported	Not reported	Not reported	Not reported	Not reported	Not reported	Not reported	Key dosimetric results (not ML performance): Mean heart dose reduced by 0.7 ± 0.6 Gy; heart D0.03cc reduced by 8.6 ± 12.1 Gy; LV-V5 reduced by 6.33 ± 5.57% (n=12); LADA D0.03cc reduced 0.0–17.3 Gy; LMCA mean dose reduced 1.13 ± 1.15 Gy.	Deep Learning (U-Net)
Interpretable Machine Learning for Choosing Radiation Dose-volume Constraints on Cardio-pulmonary Substructures Associated with Overall Survival in NRG Oncology RTOG 0617.	Lee SH and Geng H and Arnold J and Caruana R and Fan Y and Rosen MA and Apte AP and Deasy JO and Bradley JD and Xiao Y	Prediction/Dosiomics	Explainable Boosting Machine (EBM); multiblock sparse partial least squares regression; supervised PCA; Boruta; random survival forest; extreme gradient boosting; DeepSurv	Survival machine-learning models: Explainable Boosting Machine (EBM) (glass-box), Cox Proportional Hazards (CPH), Random Survival Forest (RSF), Extreme Gradient Boosting Survival Embeddings (XGBSE), DeepSurv (CPH deep neural network)	Not reported	Not reported	Not reported	Not reported	Not reported	Not reported	Not reported	Not reported	Harrell’s C-index was the primary performance metric used to evaluate overall survival discrimination (EBM achieved the highest test-set C-index of 0.653).; Primary performance metric: Harrell’s C-index. Validation set C-index (95% CI): XGBSE 0.636 (0.573–0.700); EBM 0.633 (0.564–0.701); RSF 0.628 (0.566–0.691); CPH 0.622 (0.557–0.688); DeepSurv 0.610 (0.545–0.675). Test set C-index (95% CI): EBM…	Explainable Boosting Machine (EBM); multiblock sparse partial least squares regression; supervised PCA; Boruta; random survival forest; extreme gradient boosting; DeepSurv
Machine learning based radiomics model to predict radiotherapy induced cardiotoxicity in breast cancer.	Talebi A and Bitarafan-Rajabi A and Alizadeh-Asl A and Seilani P and Khajetash B and Hajianfar G and Tavakoli M	Prediction	Neural network (NN), generalized linear model (GLM), Naive Bayes (NB), support vector machine (SVM), and random forrest (RF)	Supervised machine-learning classifiers with feature-selection pipelines: Support Vector Machine (SVM), Random Forest (RF), Neural Network (NN), Generalized Linear Model (GLM), Naïve Bayes (NB) combined with Recursive Feature Elimination (RFE), Forward Selection (FS), and Maximum Relevance Minimum Redundancy (MRmr)	Dosimetric model achieved AUC up to 0.73; dosimetric plus demographic model achieved AUC up to 0.75; dosimetric plus demographic plus clinical model achieved AUC up to 0.85; dosimetric plus demographic plus clinical plus imaging model achieved AUC up to 0.97; AUCs were evaluated using five-fold cross-validation.	Not reported	Not reported	Not reported	Not reported	Not reported	Not reported	Not reported	Mean left ventricular ejection fraction and global longitudinal strain decreased significantly at 6 months compared with baseline, with p-value < 0.001.; Event rate: 58.5%. Validation: 70/30 train–test split with internal 5-fold cross-validation. Feature groups evaluated: (1) Dosimetric; (2) Dosimetric + Demographic; (3) Dosimetric + Demographic + Clinical; (4) Dosimetric + Demographic + Clinical…	Neural network (NN), generalized linear model (GLM), Naive Bayes (NB), support vector machine (SVM), and random forrest (RF)
Machine learning modeling of cancer treatment-related cardiac events in breast cancer: utilizing dosiomics and radiomics	Dincer, S and Akmansu, M and Akyol, O	Prediction	Gradient-boosted classification	Supervised machine-learning model selected via TPOT AutoML; final algorithm: Gradient-Boosted Classification with gradient-boosted recursive feature elimination	0.96	Not reported	Not reported	Not reported	Not reported	Not reported	Not reported	Not reported	Permutation testing was used to confirm that model performance was non-random, with p < 0.05 for the two main models; event rate 16.66%. Features extracted per patient: 111 dosiomic + 119 radiomic features + clinical variables. Radiomics/dosiomics extraction: PyRadiomics (IBSI-compliant); features include first-order, shape, GLCM, GLDM, GLSZM, GLRLM, NGTDM. Model comparison (Table 1): Clinical + …	Gradient-boosted classification
Machine Learning-Based Risk Assessment for Cancer Therapy-Related Cardiac Dysfunction in 4300 Longitudinal Oncology Patients.	Zhou Y and Hou Y and Hussain M and Brown SA and Budd T and Tang WHW and Abraham J and Xu B and Shah C and Moudgil R and Popovic Z and Cho L and Kanj M and Watson C and Griffin B and Chung MK and Kapadia S and Svensson L and Collier P and Cheng F	Prediction	Classification models: (k-nearest neighbors, LR, SVM, RF, and GB)	Supervised machine-learning classification models evaluated: Logistic Regression (LR), Random Forest (RF), Gradient Boosting (GB), Support Vector Machine (SVM), and k-Nearest Neighbors (k-NN)	Coronary artery disease: AUROC 0.821 (95% CI, 0.815–0.826); atrial fibrillation: AUROC 0.787 (95% CI, 0.782–0.792); heart failure: AUROC 0.882 (95% CI, 0.878–0.887); stroke: AUROC 0.660 (95% CI, 0.650–0.670); myocardial infarction: AUROC 0.807 (95% CI, 0.799–0.816); de novo CTRCD: AUROC 0.802 (95% CI, 0.797–0.807).	Not reported	Not reported	Not reported	Not reported	Not reported	Not reported	Not reported	Multiple cardiovascular endpoints were modeled separately rather than as a composite outcome; Validation: 100 random train/val/test splits (81%/9%/10%) + time-based split (pre-2017 vs post-2017) for generalizability. Best-performing approach: LR with combined features. AUPR (combined features): HF 0.651; AF 0.401; CAD 0.481; MI 0.220; Stroke 0.138; de novo CTRCD 0.592.	Classification models: (k-nearest neighbors, LR, SVM, RF, and GB)
Mutual enhancing learning-based automatic segmentation of CT cardiac substructure.	Momin S and Lei Y and McCall NS and Zhang J and Roper J and Harms J and Tian S and Lloyd MS and Liu T and Bradley JD and Higgins K and Yang X	Imaging/Segmentation	Deep Learning	Deep learning mutual-enhancing segmentation framework consisting of Retina U-Net backbone + paired classification (C-Net) and segmentation (S-Net)	Not reported	Not reported	Not reported	Not reported	Not reported	Not reported	Not reported	Not reported	Dice Similarity Coefficient (primary metric for segmentation quality); higher DSCs for 2/3 substructures (0.945 vs. 0.948 for left ventricular cavity; 0.908 vs. 0.925 for right ventricular cavity) indicates effectiveness of proposed method Key DSC results (proposed method): Coronary arteries (5-fold CV) — LADA 0.71 ± 0.14, LCFLX 0.67 ± 0.17, LMCA 0.72 ± 0.17, RCA 0.71 ± 0.14; Coronary arteries (h…	Deep Learning
Novel Functional Radiomics for Prediction of Cardiac Positron Emission Tomography Avidity in Lung Cancer Radiotherapy.	Choi W and Jia Y and Kwak J and Werner-Wasik M and Dicker AP and Simone NL and Storozynsky E and Jain V and Vinogradskiy Y	Imaging/Radiomics	Tree based TPOT AutoML framework	Radiomics-based supervised classification model discovered and optimized using TPOT AutoML; final classifier: Extra Trees Classifier with variance thresholding, one-hot encoding, recursive feature elimination (RFE), and sequential feature selection	Not reported	Not reported	Not reported	Training (TJU): 92.4%; Internal validation: 95.0%; External validation (ACRIN): 80.3%; External validation (CU): 91.9%	Not reported	Not reported	Not reported	Not reported	External accuracy 0.803–0.919; Feature robustness filtering: ICC ≥0.90 between manual vs automated heart contours. Cross-validation: 10-fold CV; mean CV accuracy 89.8%.	Tree based TPOT AutoML framework
Open-source, fully-automated hybrid cardiac substructure segmentation: development and optimisation.	Finnegan RN and Chin V and Chlap P and Haidar A and Otton J and Dowling J and Thwaites DI and Vinod SK and Delaney GP and Holloway L	Imaging/Segmentation	Deep learning	Hybrid fully automated cardiac substructure segmentation tool combining deep learning (nnU-Net whole-heart segmentation), multi-atlas mapping for chambers and great vessels, and geometric rule-based modeling	Not reported	Not reported	Not reported	Not reported	Not reported	Not reported	Not reported	Not reported	Dice similarity coefficient (median): Whole heart 0.93; chambers 0.81–0.90; great vessels 0.43–0.76; coronary arteries 0.00–0.06; valves 0.22–0.53; conduction nodes 0.43–0.56. Mean distance to agreement (median): <6 mm for all structures. Hausdorff distance (median): 7.7–19.7 mm across structures. Volume ratio (auto/manual): 0.95–1.49 for all structures except LMCA (2.07).	Deep learning
Percutaneous Coronary Intervention Mortality, Cost, Complications, and Disparities after Radiation Therapy: Artificial Intelligence-Augmented, Cost Effectiveness, and Computational Ethical Analysis	Monlezun, DJ	Prediction	Regression model, Neural Network	Bayesian Machine Learning–augmented Propensity Score translational (BAM-PS) framework	Not reported	Not reported	Not reported	Not reported	Not reported	Not reported	Not reported	Not reported	Primary outcomes: Inpatient mortality; secondary outcomes included PCI utilization, complications, and costs. Key findings: Post-AMI PCI mortality generally comparable with vs without radiation; however, in breast cancer, PCI after radiation significantly increased inpatient mortality (OR 3.70, 95% CI 1.10–12.43, p = 0.035).	Regression model, Neural Network
Predicting heart dose in left-sided breast cancer patients using volumetric modulated arc therapy: an anatomical feature-driven machine learning model	Patil, D and Zope, MK and Raj, R and Devi, S	Prediction/Dosiomics	Regression model	Elastic Net regression	Not reported	Not reported	Not reported	Not reported	Not reported	Not reported	Mean heart dose: VMAT-2P 0.9181; VMAT-4P 0.9100; VMAT-5P 1.0812. Heart V5Gy: VMAT-2P 7.9718; VMAT-4P 5.9990; VMAT-5P 4.8242. Heart V25Gy: VMAT-2P 2.1473; VMAT-4P 2.1798; VMAT-5P 2.5383.	Not reported	Median Absolute Error (MEDAE): Mean heart dose — VMAT-2P 0.5926; VMAT-4P 0.5761; VMAT-5P 0.7509. Heart V5Gy — VMAT-2P 5.5702; VMAT-4P 4.7981; VMAT-5P 2.1188. Heart V25Gy — VMAT-2P 1.0053; VMAT-4P 1.5313; VMAT-5P 2.1232. Model evaluation: 70% training / 30% testing split; metrics reported on test set.	Regression model
Prediction of new-onset atrial fibrillation in patients with non-small cell lung cancer treated with curative-intent conventional radiotherapy.	Tohidinezhad F and Nürnberg L and Vaassen F and Ma Ter Bekke R and Jwl Aerts H and El Hendriks L and Dekker A and De Ruysscher D and Traverso A	Prediction	Regression model	Multivariable logistic regression-based prediction model	0.80 (95% CI 0.76 - 0.84)	Not applicable	Not applicable	Not applicable	Not applicable	"The calibration curve showed good conformation of the predicted probabilities versus the actual outcomes for probabilities ranging between 0.1 and 0.9."	Not applicable	Not applicable	Decision Curve Analysis showed positive net clinical benefit; OR reported for individual predictors; Internal validation only; Model discrimination: Apparent AUC 0.82 (95% CI 0.78–0.85); optimism-corrected AUC 0.80. Positive Predictive Value: 65% at optimal threshold (0.42). Negative Predictive Value: 85% at optimal threshold. Validation: Internal validation with 1000 bootstrap resamples.	Regression model
Prediction of Radiation Therapy Induced Cardiovascular Toxicity from Pretreatment CT Images in Patients with Thoracic Malignancy via an Optimal Biomarker Approach	Long, MJ and Alnoury, M and Udupa, JK and Tong, YB and Wu, CY and Poole, N and Mannikeri, S and Ky, B and Feigenberg, SJ and Zou, JW and O'Reilly, S and Torigian, DA	Prediction	ML optimal biomarker (OBM), SVM	Support Vector Machine (SVM) classifier using an Optimal Biomarker (OBM) feature-selection	Not reported	Not reported	Not reported	0.88 for LV-derived features 0.76-0.88 across all other CV structures tested	Not reported	Not reported	Not reported	Not applicable	Feature extraction: 1,078 features per structure (GLCM, LBP texture; intensity; morphology). Feature selection: Top 6 features (Nf=6) selected using modified OBM; all possible combinations evaluated. Best-performing structure: Left ventricle (LV). Testing accuracies by structure: Range 0.76–0.88; Heart 0.84, LA 0.84, RA 0.76, RV 0.76, Ascending aorta 0.76, Aortic arch 0.84, Descending thoracic ao…	ML optimal biomarker (OBM), SVM
Predictive Value of Changes in Basal Myocardial 18F-Fluorodeoxyglucose Uptake for Cardiotoxicity in Patients With Locally Advanced Esophageal Cancer Receiving Definitive Radiation	Cai, GX and Wang, KY and Zhao, JR and Huang, BY and Wang, WQ and Wang, XH and Li, CB and Li, JS and Cheng, B and Yu, JM and Meng, X	Prediction	Regression model	Statistical predictive models using competing-risk regression (Fine–Gray) and Cox proportional hazards regression	Not reported	Not reported	Not reported	Not reported	Not reported	Not reported	Not reported	Not reported	HRs 2.48–3.93; Multivariate HRs (training cohort): Basal ΔSUVRmean HR 2.477 (95% CI 1.166–5.261, P=.018) in whole-heart model; consistent significance across LV, LAD, LCX, and RCA models. Patients without pre-existing cardiac disease: Basal ΔSUVRmean HRs 3.933–5.092 across models (all P≤.013). Model evaluation: Discrimination assessed by time-dependent ROC curves; overall performance by Brier sco…	Regression model
Prospective deployment of an automated implementation solution for artificial intelligence translation to clinical radiation oncology	Kehayias, CE and Yan, YJ and Bontempi, D and Quirk, S and Bitterman, DS and Bredfeldt, JS and Aerts, HJWL and Mak, RH and Guthier, CV	Imaging/Segmentation	Deep Learning	Deep learning–based automated clinical deployment platform (DL-ODA) incorporating multiple nnU-Net–based segmentation models	Not reported	Not reported	Not reported	Not reported	Not reported	Not reported	Not reported	Not reported	Dice range 0.46–0.97; (Contour QA, median Full DSC): Heart 0.91 (IQR 0.87–0.93); Left lung 0.96; Right lung 0.97; Liver 0.94; Left kidney 0.91; Right kidney 0.91; Esophagus 0.76; Trachea 0.57; Stomach 0.74; Small bowel 0.46. Partial DSC improvement: Heart 0.94; Esophagus 0.81; Trachea 0.73; Stomach 0.86; Small bowel 0.70. Breast model geometric performance (test set): Median Full DSC 0.91–0.92.	Deep Learning
Radiomics Analysis on Computed Tomography Images for Prediction of Chemoradiation-induced Heart Failure in Breast Cancer by Machine Learning Models	Ansari, F and Neshasteh-Riz, A and Paydar, R and Mohagheghi, F and Felegari, S and Beigi, M and Cheraghi, S	Prediction	Radiomics-based supervised ML classifiers (Random Forest, Decision Tree, KNN)	Supervised machine-learning classifiers: Random Forest (RF), Decision Tree (DT), and K-Nearest Neighbors (KNN) using radiomic, dosimetric, and clinical features; deep learning (SwinUNETR, nnUNet) used only for heart autosegmentation	0.98	0.83	0.85	0.85	Not reported	Not reported	Not reported	Not reported	Segmentation performance (Dice, mean ± SD): SwinUNETR 0.84 ± 0.01; nnUNet 0.82 ± 0.02 (heart ROI). Radiomics: 873 features extracted; 890 total combined features (radiomic + dosimetric + clinical); 15 features selected. Cross-validation: 5-fold CV; test split 0.2. Model comparison (Table 3): RF AUC range 0.90–0.98 depending on feature set; DT AUC 0.88–0.96; KNN AUC 0.64–0.76.	Radiomics-based supervised ML classifiers (Random Forest, Decision Tree, KNN)
RootPainter3D: Interactive-machine-learning enables rapid and accurate contouring for radiotherapy	Smith, AG and Petersen, J and Terrones-Campos, C and Berthelsen, AK and Forbes, NJ and Darkner, S and Specht, L and Vogelius, IR	Imaging/Segmentation	Deep learning (U-Net)	Interactive machine-learning system with continual training using a 3D U-Net convolutional neural network (group normalization, residual connections) trained via corrective annotation	Not reported	Not reported	Not reported	Not reported	Not reported	Not reported	Not reported	Not reported	Mean DSC ≈0.95; time ↓ ~70%; Segmentation agreement (Dice similarity coefficient): Eclipse vs RootPainter3D predicted 0.945 ± 0.008; Eclipse vs RootPainter3D corrected 0.952 ± 0.007; RootPainter3D predicted vs corrected 0.991 ± 0.005 (Table 1). Longitudinal performance: From ~image 300 onward, vast majority of Dice scores >0.98; only two outliers <0.70 in final 600 images. Time efficiency: Mean d…	Deep learning (U-Net)
Synthetic contrast-enhanced computed tomography generation using a deep convolutional neural network for cardiac substructure delineation in breast cancer radiation therapy: a feasibility study.	Chun J and Chang JS and Oh C and Park I and Choi MS and Hong CS and Kim H and Yang G and Moon JY and Chung SY and Suh YJ and Kim JS	Imaging/Segmentation	Deep Learning	Conditional generative adversarial network (cGAN) with a deep convolutional neural network	Not reported	Not reported	Not reported	Not reported	Not reported	Not reported	Not reported	20.66 ± 5.29 HU (SCECT vs CECT); 23.95 ± 6.98 HU (NCT vs CECT)	Geometric accuracy (20 test patients): Mean Dice similarity coefficient (DSC) across structures 0.81 ± 0.06; DSC by structure — Heart 0.95 ± 0.03, LV 0.91 ± 0.04, LA 0.86 ± 0.08, RV 0.85 ± 0.06, RA 0.80 ± 0.07, LAD 0.74 ± 0.14, RCA 0.55 ± 0.20. Mean surface distance (MSD): Average 2.44 ± 0.72 mm (RCA highest at 3.68 ± 1.60 mm). Dataset: 59 paired NCT–CECT scans (35 train / 4 validation / 20 test).	Deep Learning
The Association of Incidental Radiation Dose to the Heart Base with Overall Survival and Cardiac Events after Curative-intent Radiotherapy for Non-small Cell Lung Cancer: Results from the NI-HEART Study.	Walls GM and O'Connor J and Harbinson M and Duane F and McCann C and McKavanagh P and Johnston DI and Giacometti V and McAleese J and Hounsell AR and Cole AJ and Butterworth KT and McGarry CK and Hanna GG and Jain S	Prediction/Dosiomics	Deep learning for auto-segmentation and regression model for prediction	Deep learning–based cardiac substructure autosegmentation model for chambers and great vessels	Not reported	Not reported	Not reported	Not reported	Not reported	Not reported	Not reported	Not reported	Dose metric of interest: Heart base Dmax (median 54.5 Gy, IQR 35.0–58.2). Overall survival: Higher heart base Dmax (dichotomised at median) associated with worse survival (20.2 vs 28.3 months); multivariable Cox HR 1.01 per Gy (95% CI 1.00–1.02, P = 0.039).	Deep learning for auto-segmentation and regression model for prediction
The benefits evaluation of abdominal deep inspiration breath hold based on knowledge-based radiotherapy treatment planning for left-sided breast cancer	Xu, JQ and Wang, JZ and Zhao, F and Hu, WG and Yao, GR and Lu, ZJ and Yan, SX	Prediction/Dosiomics	Knowledge-based planning (KPB) using kernel density estimation (KDE) DVH prediction models	Knowledge-based planning (KBP) using kernel density estimation (KDE) dose–volume histogram (DVH) prediction models	Not reported	Not reported	Not reported	Not reported	Not reported	Not reported	Not reported	Not reported	Model task: DVH prediction and plan deliverability assessment, not outcome prediction. Training set: 40 left-sided breast cancer patients with paired FB-CT and DIBH-CT scans. Test set: 10 additional patients with both breathing conditions.	Knowledge-based planning (KPB) using kernel density estimation (KDE) DVH prediction models
The influence of cardiac substructure dose on survival in a large lung cancer stereotactic radiotherapy cohort using a robust personalized contour analysis	van der Pol, LHG and Pomp, J and Hoesein, FAAM and Raaymakers, BW and Verhoeff, JJC and Fast, MF	Imaging/Segmentation	Deep learning (U-Net) for autosegmentation and ML for survival modeling (elastic net cox regression, random forests)	Deep learning–based nnU-Net auto-segmentation model for cardiac substructures; Elastic Net (EN) regression and Random Survival Forests (RSF) used for survival modelling	Not reported	Not reported	Not reported	Not reported	Not reported	Not reported	Not reported	Not reported	Cardiac structures generated: LA, LV, RA, RV, aorta, SVC, IVC, PA (only structures with median Dice ≥0.80 and MSD <2 mm included). Segmentation performance inclusion criteria: median Dice similarity coefficient ≥0.80; mean surface distance (MSD) <2 mm. Dose metrics extracted: Dmean and D0.1 cc (surrogate for Dmax), converted to EQD2 (α/β = 2 Gy for heart/CS; robustness tested with α/β = 3 Gy). Mo…	Deep learning (U-Net) for autosegmentation and ML for survival modeling (elastic net cox regression, random forests)
Validation of a Fully Automated Hybrid Deep Learning Cardiac Substructure Segmentation Tool for Contouring and Dose Evaluation in Lung Cancer Radiotherapy	Chin, V and Finnegan, RN and Chlapy, P and Otton, J and Haidar, A and Holloway, L and Thwaites, DI and Dowling, J and Delaney, GP and Vinod, SK	Imaging/Segmentation	Deep Learning	Hybrid automatic segmentation tool combining deep learning (nnU-Net whole-heart segmentation), multi-atlas mapping for chambers and great vessels, and geometric definitions	Not reported	Not reported	Not reported	Not reported	Not reported	Not reported	Not reported	Dose–volume histogram MAE (median, %): 1.65–3.58% for whole heart and chambers; 2.88–13.30% for smaller substructures	DSC 0.75–0.93; Geometric accuracy (median Dice similarity coefficient, DSC): whole heart 0.93; chambers 0.75–0.87; great vessels 0.41–0.73; valves 0.17–0.33; coronary arteries 0.00–0.06; conduction nodes 0.24–0.50. Mean distance to agreement (median, mm): whole heart/chambers 2.09–3.34 mm; valves/conduction nodes 3.36–6.10 mm; coronary arteries 6.45–8.54 mm. Hausdorff distance (median, mm): whole…	Deep Learning
Validation of an established deep learning auto-segmentation tool for cardiac substructures in 4D radiotherapy planning scans	Walls, GM and Giacometti, V and Apte, A and Thor, M and McCann, C and Hanna, GG and 'Connor, J and Deasy, JO and Hounsell, AR and Butterworth, KT and Cole, AJ and Jain, S and McGarry, CK	Imaging/Segmentation	Deep Learning	Deep learning–based convolutional neural network auto-segmentation tool	Not reported	Not reported	Not reported	Not reported	Not reported	Not reported	Not reported	Median absolute difference in mean dose: 0.2 Gy (range 0–1.7 Gy); Median absolute difference in maximum dose (Dmax): 0.4 Gy (range 0.1–2.2 Gy)	DSC 0.85; Geometric agreement: Overall median Dice similarity coefficient (DSC) 0.85; DSC range across structures 0.76–0.94 (lowest IVC 0.76, highest PC 0.94). Volume difference: Overall median absolute volume difference 11.8% (range 6.5–41.5%). Centroid shift: Approximately 3–4 mm overall; AO 1.7 mm, PA 5.7 mm. HD95: Median 7.1 mm (AO 2.4 mm, RV 8.9 mm).	Deep Learning

## Sheet: TRIPOD+AI
Article	Authors	1	2	3a	3b	3c	4	5a	5b	6a	6b	6c	7	8a	8b	8c	9a	9b	9c	10	11	12a	12b	12c	12d	12e	12f	12g	13	14	15	16	17	18a	18b	18c	18d	18e	18f	19	20a	20b	20c	21	22	23a	23b	24	25
A causal network model to estimate the cardiotoxic effect of oncological treatments in young breast cancer survivors	Bernasconi, A and Zanga, A and Lucas, PJF and Scutari, M and Trama, A and Stella, F	1	1	1	1	0	1	1	1	1	1	1	1	1	0	0	1	1	0	0	1	1	0	1	1	1	0	1	0	0	1	1	0	1	1	0	0	1	1	0	0	1	0	1	1	1	0	0	1
Acute coronary event (ACE) prediction following breast radiotherapy by features extracted from 3D CT, dose, and cardiac structures	Choi, BS and Yoo, SK and Moon, J and Chung, SY and Oh, J and Baek, S and Kim, Y and Chang, JS and Kim, H and Kim, JS	1	1	1	1	1	1	1	1	1	1	1	1	1	1	1	1	1	1	0	1	1	1	1	1	1	1	1	1	1	1	1	1	1	1	1	1	1	1	1	1	1	1	1	1	1	0	1	1
Artificial Intelligence-Assisted Prediction of Late-Onset Cardiomyopathy Among Childhood Cancer Survivors.	Güntürkün F and Akbilgic O and Davis RL and Armstrong GT and Howell RM and Jefferies JL and Ness KK and Karabayir I and Lucas JT Jr and Srivastava DK and Hudson MM and Robison LL and Soliman EZ and Mulrooney DA	1	1	1	1	1	1	1	1	1	1	1	1	1	1	1	1	1	1	0	1	1	1	1	1	1	1	1	1	1	1	1	1	1	1	1	1	1	1	1	1	1	1	1	1	1	0	1	1
Artificial Intelligence-Based Patient Selection for Deep Inspiration Breath-Hold Breast Radiotherapy from Respiratory Signals	Vendrame, A and Cappelletto, C and Chiovati, P and Vinante, L and Parvej, M and Caroli, A and Pirrone, G and Barresi, L and Drigo, A and Avanzo, M	1	1	1	1	1	1	1	1	1	1	1	1	1	0	0	0	0	0	1	1	1	1	1	1	1	0	0	1	1	1	0	0	1	1	1	1	1	0	1	1	1	1	1	1	1	1	1	1
Baseline atrial volume indices and major adverse cardiac events following thoracic radiotherapy	Qiao, EM and He, JH and Silos, KD and Gasho, JO and Belen, P and Bitterman, DS and Mckenzie, E and Steers, J and Guthier, C and Nohria, A and Lu, MT and Aerts, HJWL and Nikolova, AP and Mak, RH and Atkins, KM	1	1	1	1	1	1	1	1	1	1	1	1	1	0	0	1	1	1	0	1	1	1	1	1	1	1	1	1	1	1	1	0	1	1	1	1	1	1	1	1	1	1	1	1	1	0	1	1
Combining dosiomics and machine learning methods for predicting severe cardiac diseases in childhood cancer survivors: the French Childhood Cancer Survivor Study	Bentriou, M and Letort, V and Chounta, S and Fresneau, B and Do, D and Haddy, N and Diallo, I and Journy, N and Zidane, M and Charrier, T and Aba, N and Ducos, C and Zossou, VS and de Vathaire, F and Allodji, RS and Lemler, S	1	1	1	1	1	1	1	1	1	1	1	1	1	0	0	1	1	1	0	1	1	1	1	1	1	1	1	1	1	1	0	0	1	1	1	1	1	1	1	1	1	1	1	1	1	0	1	1
Development and application of an elastic net logistic regression model to investigate the impact of cardiac substructure dose on radiation-induced pericardial effusion in patients with NSCLC	Niedzielski, JS and Wei, X and Xu, T and Gomez, DR and Liao, ZX and Bankson, JA and Lai, SPY and Court, LE and Yang, JZ	1	1	1	1	1	1	1	1	1	1	1	1	1	0	0	0	0	0	1	1	1	1	1	1	1	1	1	1	1	1	0	0	1	1	1	1	1	1	1	1	1	1	1	1	1	1	1	1
Development and Validation of a Prediction Model for Cardiac Events in Patients With Hepatocellular Carcinoma Undergoing Stereotactic Body Radiation Therapy	Lee, HI and Son, J and Cho, B and Goh, Y and Jung, J and Park, JH and Chie, EK and Kim, KS and Kim, YH and Kang, HC and Yoon, SM	1	1	1	1	1	1	1	1	1	1	1	1	1	1	1	1	1	1	0	1	1	1	1	1	1	1	1	1	1	1	1	0	1	1	1	1	1	1	1	1	1	1	1	1	1	1	1	1
Development of deep learning chest X-ray model for cardiac dose prediction in left-sided breast cancer radiotherapy	Koide, Y and Aoyama, T and Shimizu, H and Kitagawa, T and Miyauchi, R and Tachibana, H and Kodaira, T	1	1	1	1	1	1	1	1	1	1	1	1	1	1	1	0	0	0	0	1	1	1	1	1	1	0	0	1	1	1	0	0	1	1	1	1	1	1	1	1	1	1	1	1	1	0	1	1
Development of learning-based predictive models for radiation-induced atrial fibrillation in non-small cell lung cancer patients by integrating patient-specific clinical, dosimetry, and diagnostic information	Yoo, SK and Kim, KH and Noh, JM and Oh, J and Yang, G and Kim, J and Kim, N and Kim, H and Yoon, HI	1	1	1	1	1	1	1	1	1	1	1	1	1	0	0	1	1	1	1	1	1	1	1	1	1	1	1	1	1	1	0	0	1	1	1	1	1	1	1	1	1	1	1	1	1	1	1	1
Dosimetric Planning Tradeoffs to Reduce Heart Dose Using Machine Learning-Guided Decision Support Software in Patients with Lung Cancer	Bitterman, DS and Selesnick, P and Bredfeldt, J and Williams, CL and Guthier, C and Huynh, E and Kozono, DE and Lewis, JH and Cormack, RA and Carpenter, CM and Mak, RH and Atkins, KM	1	1	1	1	1	1	1	1	1	1	1	1	1	0	0	0	0	0	0	1	1	1	1	1	1	1	1	1	1	1	0	0	1	1	1	1	1	1	1	1	1	1	1	1	1	0	1	1
Dosiomics-Based Prediction of Radiation-Induced Valvulopathy after Childhood Cancer	Chounta, S and Allodji, R and Vakalopoulou, M and Bentriou, M and Do, DT and De Vathaire, F and Diallo, I and Fresneau, B and Charrier, T and Zossou, V and Christodoulidis, S and Lemler, S and Le Chevalier, VL	1	1	1	1	1	1	1	1	1	1	1	1	1	0	0	1	1	1	0	1	1	1	1	1	1	1	1	1	1	1	1	0	1	1	1	1	1	1	1	1	1	1	1	1	1	0	1	1
Effect of Radiation Doses to the Heart on Survival for Stereotactic Ablative Radiotherapy for Early-stage Non-Small-cell Lung Cancer: An Artificial Neural Network Approach	Chan, ST and Ruan, D and Shaverdian, N and Raghavan, G and Cao, M and Lee, P	1	1	1	1	1	1	1	1	1	1	1	1	1	0	0	0	0	0	0	1	1	1	1	1	1	1	1	1	1	1	0	0	1	1	1	1	1	1	1	1	1	1	1	1	1	0	1	1
Enhanced cardiac substructure sparing through knowledge-based treatment planning for non-small cell lung cancer radiotherapy	Momin, S and Wolf, J and Roper, J and Lei, Y and Liu, T and Bradley, JD and Higgins, K and Yang, XF and Zhang, JH	1	1	1	1	1	1	1	1	1	1	1	1	1	0	0	0	0	0	0	1	1	1	1	1	1	1	1	1	1	1	0	0	1	1	1	1	1	1	1	1	1	1	1	1	1	0	1	1
Estimating the risk of major adverse cardiac events following radiotherapy for left breast cancer using a modified generalized Lyman normal-tissue complication probability model.	Lai TY and Hu YW and Wang TH and Chen JP and Shiau CY and Huang PI and Lai IC and Liu YM and Huang CC and Tseng LM and Huang N and Liu CJ	1	1	1	1	1	1	1	1	1	1	1	1	1	0	0	1	1	1	0	1	1	1	1	1	1	1	1	1	1	1	1	0	1	1	1	1	1	1	1	1	1	1	1	1	1	0	1	1
Estimation of heart dose in left breast cancer radiotherapy: Assessment of vDIBH feasibility using the supervised machine learning algorithm	Rajurkar, SA and Verma, T and Gupta, R	1	1	1	1	1	1	1	1	1	1	1	1	1	0	0	0	0	0	0	1	1	1	1	1	1	1	1	1	1	1	0	0	1	1	1	1	1	1	1	1	1	1	1	1	1	0	1	1
Evaluating coronary arteries and predicting MACEs using CCTA in lung cancer patients receiving chemotherapy or chemoradiotherapy	Xie, YH and Shen, HS and Xu, Q and Tu, CR and Yang, R and Liu, T and Tang, H and Miao, ZM and Zhang, JQ	1	1	1	1	1	1	1	1	1	1	1	1	1	0	0	1	1	1	0	1	1	1	1	1	1	1	1	1	1	1	1	0	1	1	1	1	1	1	1	1	1	1	1	1	1	0	1	1
Explainable Artificial Intelligence to Identify Dosimetric Predictors of Toxicity in Patients with Locally Advanced Non-Small Cell Lung Cancer: A Secondary Analysis of RTOG 0617	Ladbury, C and Li, RC and Danesharasteh, A and Ertem, Z and Tam, A and Liu, JS and Hao, CR and Li, RS and McGee, H and Sampath, S and Williams, T and Glaser, S and Khasawneh, M and Liao, ZX and Lee, P and Ryckman, J and Shaikh, P and Amini, A	1	1	1	1	1	1	1	1	1	1	1	1	1	0	0	1	1	1	0	1	1	1	1	1	1	1	1	1	1	1	0	0	1	1	1	1	1	1	1	1	1	1	1	1	1	0	1	1
Factors impacting cardiac dose and overall survival in post-operative non-small cell lung cancer patients	Cruz-Chamorro, R and Bryant, JM and Henning, J and Robinson, LA and Lee, DH and Fontaine, J and Toloza, E and Rosenberg, SA and Kim, J and El Naqa, I and Dilling, TJ	1	1	1	1	1	1	1	1	1	1	1	1	1	0	0	1	1	1	0	1	1	1	1	1	1	1	1	1	1	1	1	0	1	1	1	1	1	1	1	1	1	1	1	1	1	0	1	1
Interpretable Machine Learning for Choosing Radiation Dose-volume Constraints on Cardio-pulmonary Substructures Associated with Overall Survival in NRG Oncology RTOG 0617.	Lee SH and Geng H and Arnold J and Caruana R and Fan Y and Rosen MA and Apte AP and Deasy JO and Bradley JD and Xiao Y	1	1	1	1	1	1	1	1	1	1	1	1	1	0	0	1	1	1	0	1	1	1	1	1	1	1	1	1	1	1	1	0	1	1	1	1	1	1	1	1	1	1	1	1	1	0	1	1
Machine learning based radiomics model to predict radiotherapy induced cardiotoxicity in breast cancer.	Talebi A and Bitarafan-Rajabi A and Alizadeh-Asl A and Seilani P and Khajetash B and Hajianfar G and Tavakoli M	1	1	1	1	1	1	1	1	1	1	1	1	1	0	0	0	0	0	0	1	1	1	1	1	1	1	1	1	1	1	0	0	1	1	1	1	1	1	1	1	1	1	1	1	1	0	1	1
Machine learning modeling of cancer treatment-related cardiac events in breast cancer: utilizing dosiomics and radiomics	Dincer, S and Akmansu, M and Akyol, O	1	1	1	1	1	1	1	1	1	1	1	1	1	0	0	0	0	0	0	1	1	1	1	1	1	1	1	1	1	1	0	0	1	1	1	1	1	1	1	1	1	1	1	1	1	0	1	1
Machine Learning-Based Risk Assessment for Cancer Therapy-Related Cardiac Dysfunction in 4300 Longitudinal Oncology Patients.	Zhou Y and Hou Y and Hussain M and Brown SA and Budd T and Tang WHW and Abraham J and Xu B and Shah C and Moudgil R and Popovic Z and Cho L and Kanj M and Watson C and Griffin B and Chung MK and Kapadia S and Svensson L and Collier P and Cheng F	1	1	1	1	0	1	1	1	1	1	1	1	1	0	0	1	1	0	1	1	1	1	1	0	1	1	1	1	0	1	1	1	1	1	0	0	1	1	0	1	1	1	1	1	1	1	0	1
Percutaneous Coronary Intervention Mortality, Cost, Complications, and Disparities after Radiation Therapy: Artificial Intelligence-Augmented, Cost Effectiveness, and Computational Ethical Analysis	Monlezun, DJ	1	1	1	1	1	1	1	1	1	1	1	1	1	0	0	1	1	0	1	0	1	1	1	1	1	0	1	0	1	1	1	1	0	0	0	0	0	0	0	1	1	0	1	0	1	1	0	1
Predicting heart dose in left-sided breast cancer patients using volumetric modulated arc therapy: an anatomical feature-driven machine learning model	Patil, D and Zope, MK and Raj, R and Devi, S	1	1	1	1	0	1	1	1	1	1	1	1	1	0	0	1	1	0	0	0	1	1	1	0	1	0	0	0	0	1	1	1	0	0	0	0	0	0	0	1	1	1	1	0	1	0	0	1
Prediction of new-onset atrial fibrillation in patients with non-small cell lung cancer treated with curative-intent conventional radiotherapy.	Tohidinezhad F and Nürnberg L and Vaassen F and Ma Ter Bekke R and Jwl Aerts H and El Hendriks L and Dekker A and De Ruysscher D and Traverso A	1	1	1	1	0	1	1	1	1	1	1	1	1	1	0	1	1	1	0	0	1	1	1	0	1	0	1	1	0	1	0	1	1	1	0	0	0	0	0	1	1	0	1	1	1	0	0	1
Prediction of Radiation Therapy Induced Cardiovascular Toxicity from Pretreatment CT Images in Patients with Thoracic Malignancy via an Optimal Biomarker Approach	Long, MJ and Alnoury, M and Udupa, JK and Tong, YB and Wu, CY and Poole, N and Mannikeri, S and Ky, B and Feigenberg, SJ and Zou, JW and O'Reilly, S and Torigian, DA	1	1	1	1	0	1	1	1	1	1	1	1	1	1	0	1	1	0	1	0	1	1	1	0	1	0	0	0	0	1	1	1	0	0	0	0	0	0	0	1	1	0	1	1	1	0	0	1
Predictive Value of Changes in Basal Myocardial 18F-Fluorodeoxyglucose Uptake for Cardiotoxicity in Patients With Locally Advanced Esophageal Cancer Receiving Definitive Radiation	Cai, GX and Wang, KY and Zhao, JR and Huang, BY and Wang, WQ and Wang, XH and Li, CB and Li, JS and Cheng, B and Yu, JM and Meng, X	1	1	1	1	0	1	1	1	1	1	1	1	1	1	0	1	1	1	0	0	1	1	1	1	1	0	0	0	0	1	1	1	1	1	0	0	0	0	0	1	1	1	1	0	1	1	0	1
Radiomics Analysis on Computed Tomography Images for Prediction of Chemoradiation-induced Heart Failure in Breast Cancer by Machine Learning Models	Ansari, F and Neshasteh-Riz, A and Paydar, R and Mohagheghi, F and Felegari, S and Beigi, M and Cheraghi, S	1	0	1	1	0	1	1	1	1	1	1	1	1	1	0	1	1	1	1	0	1	1	1	0	1	0	1	0	0	1	1	0	0	0	0	0	0	0	0	1	1	0	1	1	1	0	0	1
The Association of Incidental Radiation Dose to the Heart Base with Overall Survival and Cardiac Events after Curative-intent Radiotherapy for Non-small Cell Lung Cancer: Results from the NI-HEART Study.	Walls GM and O'Connor J and Harbinson M and Duane F and McCann C and McKavanagh P and Johnston DI and Giacometti V and McAleese J and Hounsell AR and Cole AJ and Butterworth KT and McGarry CK and Hanna GG and Jain S	0	0	1	1	0	0	1	1	1	1	1	1	0	1	0	1	1	1	0	1	0	0	0	0	0	0	0	0	0	0	0	1	0	0	0	0	0	0	0	1	1	0	0	0	0	0	0	1
The benefits evaluation of abdominal deep inspiration breath hold based on knowledge-based radiotherapy treatment planning for left-sided breast cancer	Xu, JQ and Wang, JZ and Zhao, F and Hu, WG and Yao, GR and Lu, ZJ and Yan, SX	0	1	1	1	0	1	1	0	1	1	1	1	1	1	1	1	1	1	0	0	1	1	1	0	1	0	1	0	0	1	1	0	0	0	0	0	0	0	0	1	1	1	1	1	1	0	0	1
Total number		29	29	31	31	22	30	31	30	31	31	31	31	30	10	5	22	22	17	7	24	30	29	30	24	30	20	25	23	22	30	17	9	25	25	21	21	23	22	21	30	31	25	30	27	30	7	21	31
Percent %		94	94	100	100	71	97	100	97	100	100	100	100	97	32	16	71	71	54.8387	22.5806	77.4194	96.7742	93.5484	96.7742	77.4194	96.7742	64.5161	80.6452	74.1935	70.9677	96.7742	54.8387	29.0323	80.6452	80.6452	67.7419	67.7419	74.1935	70.9677	67.7419	96.7742	100	80.6452	96.7742	87.0968	96.7742	22.5806	67.7419	100
Total articles		31	31	31	31	31	31	31	31	31	31	31	31	31	31	31	31	31	31	31	31	31	31	31	31	31	31	31	31	31	31	31	31	31	31	31	31	31	31	31	31	31	31	31	31	31	31	31	31
[truncated: 7 more columns]

## Sheet: PROBAST
Article	Authors	Domain 1: Participants	Domain 2: Predictors	Domain 3: Outcome	Domain 4: Analysis	Overall Assessment	Comment
A causal network model to estimate the cardiotoxic effect of oncological treatments in young breast cancer survivors	Bernasconi, A and Zanga, A and Lucas, PJF and Scutari, M and Trama, A and Stella, F	Low	Low	Low	High	High	The overall risk of bias was judged High because the Analysis domain was rated high risk due to a low number of outcome events, absence of internal validation or shrinkage, and lack of calibration assessment.
Acute coronary event (ACE) prediction following breast radiotherapy by features extracted from 3D CT, dose, and cardiac structures	Choi, BS and Yoo, SK and Moon, J and Chung, SY and Oh, J and Baek, S and Kim, Y and Chang, JS and Kim, H and Kim, JS	High	Unclear	Unclear	High	High	The overall risk of bias is High because at least one domain is High risk—here, Participants (outcome-dependent sampling via matched case–control style selection) and Analysis (high overfitting risk due to small event count and extensive feature selection without clear calibration reporting).
Artificial Intelligence-Assisted Prediction of Late-Onset Cardiomyopathy Among Childhood Cancer Survivors.	Güntürkün F and Akbilgic O and Davis RL and Armstrong GT and Howell RM and Jefferies JL and Ness KK and Karabayir I and Lucas JT Jr and Srivastava DK and Hudson MM and Robison LL and Soliman EZ and Mulrooney DA	Low	Low	Low	High	High	The overall risk of bias was judged High because the Analysis domain was rated high risk, driven by a relatively low number of outcome events in relation to extensive feature selection, absence of calibration assessment, and lack of external validation.
Artificial Intelligence-Based Patient Selection for Deep Inspiration Breath-Hold Breast Radiotherapy from Respiratory Signals	Vendrame, A and Cappelletto, C and Chiovati, P and Vinante, L and Parvej, M and Caroli, A and Pirrone, G and Barresi, L and Drigo, A and Avanzo, M	Unclear	Unclear	High	High	High	The overall risk of bias is High because at least one domain is High risk—here, both Outcome (the target label is defined by a cohort median split of ΔDL, i.e., a sample-dependent outcome definition) and Analysis (high overfitting risk due to n=36, a single random split internal validation, and no calibration reporting).
Baseline atrial volume indices and major adverse cardiac events following thoracic radiotherapy	Qiao, EM and He, JH and Silos, KD and Gasho, JO and Belen, P and Bitterman, DS and Mckenzie, E and Steers, J and Guthier, C and Nohria, A and Lu, MT and Aerts, HJWL and Nikolova, AP and Mak, RH and Atkins, KM	Low	Low	Low	High	High	The overall risk of bias was judged High because the Analysis domain was rated high risk, driven by a low number of outcome events relative to the high-dimensional feature space used for model development, absence of reported calibration assessment, and limited validation of the full prediction model.
Combining dosiomics and machine learning methods for predicting severe cardiac diseases in childhood cancer survivors: the French Childhood Cancer Survivor Study	Bentriou, M and Letort, V and Chounta, S and Fresneau, B and Do, D and Haddy, N and Diallo, I and Journy, N and Zidane, M and Charrier, T and Aba, N and Ducos, C and Zossou, VS and de Vathaire, F and Allodji, RS and Lemler, S	Low	Low	Low	High	High	The overall risk of bias was judged High because the Analysis domain was rated high risk, driven by a low proportion of outcome events relative to the high-dimensional predictor space, lack of reported calibration assessment, and absence of external validation.
Development and application of an elastic net logistic regression model to investigate the impact of cardiac substructure dose on radiation-induced pericardial effusion in patients with NSCLC	Niedzielski, JS and Wei, X and Xu, T and Gomez, DR and Liao, ZX and Bankson, JA and Lai, SPY and Court, LE and Yang, JZ	Low	Unclear	Low	High	High	The overall risk of bias is High because the Analysis domain was rated High risk, primarily due to overfitting concerns from a high-dimensional DVH predictor space in a modest sample (n=141), and because the “final fitted model” is presented without external validation.
Development and Validation of a Prediction Model for Cardiac Events in Patients With Hepatocellular Carcinoma Undergoing Stereotactic Body Radiation Therapy	Lee, HI and Son, J and Cho, B and Goh, Y and Jung, J and Park, JH and Chie, EK and Kim, KS and Kim, YH and Kang, HC and Yoon, SM	Low	Low	Low	Low	Low	The overall risk of bias was judged Low because all four PROBAST domains (Participants, Predictors, Outcome, and Analysis) were rated Low risk. The study benefits from a large development cohort, independent external validation, clinically well-defined outcomes, appropriate predictor handling, and comprehensive evaluation of both discrimination and calibration.
Development of deep learning chest X-ray model for cardiac dose prediction in left-sided breast cancer radiotherapy	Koide, Y and Aoyama, T and Shimizu, H and Kitagawa, T and Miyauchi, R and Tachibana, H and Kodaira, T	Unclear	Low	Low	High	High	The overall risk of bias was judged High because the Analysis domain was rated high risk, driven by the combination of a small dataset for a deep learning model, reliance on internal split-sample validation without external validation, and limited reporting aligned to PROBAST expectations for model performance evaluation (particularly calibration for the classifier use-case).
Development of learning-based predictive models for radiation-induced atrial fibrillation in non-small cell lung cancer patients by integrating patient-specific clinical, dosimetry, and diagnostic information	Yoo, SK and Kim, KH and Noh, JM and Oh, J and Yang, G and Kim, J and Kim, N and Kim, H and Yoon, HI	Low	Low	Low	High	High	The overall risk of bias was judged High because the Analysis domain was rated High risk, driven primarily by the very small number of AF events relative to the high-dimensional feature space, reliance on synthetic oversampling (SMOTE), and limited calibration assessment despite external validation.
Dosimetric Planning Tradeoffs to Reduce Heart Dose Using Machine Learning-Guided Decision Support Software in Patients with Lung Cancer	Bitterman, DS and Selesnick, P and Bredfeldt, J and Williams, CL and Guthier, C and Huynh, E and Kozono, DE and Lewis, JH and Cormack, RA and Carpenter, CM and Mak, RH and Atkins, KM	Low	Low	Unclear	High	High	The overall risk of bias was judged High because the Analysis domain was rated High risk. Although the Participants and Predictors domains were low risk, the study does not present a formally validated clinical prediction model with external validation or standard performance assessment. Instead, it applies a machine-learning decision support system to estimate dosimetric trade-offs within the sa…
Dosiomics-Based Prediction of Radiation-Induced Valvulopathy after Childhood Cancer	Chounta, S and Allodji, R and Vakalopoulou, M and Bentriou, M and Do, DT and De Vathaire, F and Diallo, I and Fresneau, B and Charrier, T and Zossou, V and Christodoulidis, S and Lemler, S and Le Chevalier, VL	Low	Low	Low	High	High	The overall risk of bias was judged High because the Analysis domain was rated High risk, driven by an extremely low number of outcome events relative to a high-dimensional dosiomics feature space, lack of reported calibration assessment, and absence of external validation.
Effect of Radiation Doses to the Heart on Survival for Stereotactic Ablative Radiotherapy for Early-stage Non-Small-cell Lung Cancer: An Artificial Neural Network Approach	Chan, ST and Ruan, D and Shaverdian, N and Raghavan, G and Cao, M and Lee, P	Low	Low	Low	High	High	In this study, the Analysis domain raises significant concerns due to model complexity, limited sample size, lack of external validation, and incomplete performance assessment. These issues outweigh the otherwise low risk in Participants, Predictors, and Outcome domains.
Enhanced cardiac substructure sparing through knowledge-based treatment planning for non-small cell lung cancer radiotherapy	Momin, S and Wolf, J and Roper, J and Lei, Y and Liu, T and Bradley, JD and Higgins, K and Yang, XF and Zhang, JH	Unclear	Low	Unclear	High	High	The overall risk of bias was judged High because the Analysis domain was rated High risk, driven by a small training/validation sample size, single-institution evaluation without external validation, and performance assessment that does not align with standard prediction-model validation metrics for a locked prediction target.
Estimating the risk of major adverse cardiac events following radiotherapy for left breast cancer using a modified generalized Lyman normal-tissue complication probability model.	Lai TY and Hu YW and Wang TH and Chen JP and Shiau CY and Huang PI and Lai IC and Liu YM and Huang CC and Tseng LM and Huang N and Liu CJ	Low	Low	Low	High	High	The overall risk of bias was judged High because the Analysis domain was rated High risk, driven by a limited number of outcome events relative to model complexity, absence of internal resampling or external validation, and lack of reported calibration assessment.
Estimation of heart dose in left breast cancer radiotherapy: Assessment of vDIBH feasibility using the supervised machine learning algorithm	Rajurkar, SA and Verma, T and Gupta, R	Unclear	Low	Low	High	High	The overall risk of bias was judged High because the Analysis domain was rated High risk, driven by a small sample size, limited internal validation without proper resampling, absence of external validation, and lack of formal calibration assessment.
Evaluating coronary arteries and predicting MACEs using CCTA in lung cancer patients receiving chemotherapy or chemoradiotherapy	Xie, YH and Shen, HS and Xu, Q and Tu, CR and Yang, R and Liu, T and Tang, H and Miao, ZM and Zhang, JQ	Low	Low	Low	High	High	The overall risk of bias was judged High because the Analysis domain was rated High risk. Although the study includes a large, well-defined cohort with clearly measured predictors and rigorously adjudicated outcomes, it evaluates prognostic associations rather than developing or validating a formal prediction model. The absence of internal or external validation, lack of calibration assessment, a…
Explainable Artificial Intelligence to Identify Dosimetric Predictors of Toxicity in Patients with Locally Advanced Non-Small Cell Lung Cancer: A Secondary Analysis of RTOG 0617	Ladbury, C and Li, RC and Danesharasteh, A and Ertem, Z and Tam, A and Liu, JS and Hao, CR and Li, RS and McGee, H and Sampath, S and Williams, T and Glaser, S and Khasawneh, M and Liao, ZX and Lee, P and Ryckman, J and Shaikh, P and Amini, A	Low	Low	Low	High	High	The overall risk of bias was judged High because the Analysis domain was rated High risk, driven by complex machine-learning modeling relative to event frequency, reliance on synthetic oversampling techniques, absence of external validation, and lack of calibration assessment.
Factors impacting cardiac dose and overall survival in post-operative non-small cell lung cancer patients	Cruz-Chamorro, R and Bryant, JM and Henning, J and Robinson, LA and Lee, DH and Fontaine, J and Toloza, E and Rosenberg, SA and Kim, J and El Naqa, I and Dilling, TJ	Low	Low	Low	High	High	The combination of a moderate sample size, high-dimensional predictor space, and lack of external validation substantially limits confidence in the model’s reliability and generalizability. The authors themselves acknowledge potential overfitting and complex, unstable relationships between cardiac dose metrics and survival.
Interpretable Machine Learning for Choosing Radiation Dose-volume Constraints on Cardio-pulmonary Substructures Associated with Overall Survival in NRG Oncology RTOG 0617.	Lee SH and Geng H and Arnold J and Caruana R and Fan Y and Rosen MA and Apte AP and Deasy JO and Bradley JD and Xiao Y	Low	Low	Low	High	High	The overall risk of bias is High because the Analysis domain is High risk, driven by (1) high-dimensional candidate predictors with data-driven feature selection, (2) analytic handling of censoring via survival-time imputation for some models, (3) lack of external validation, and (4) lack of reported calibration.
Machine learning based radiomics model to predict radiotherapy induced cardiotoxicity in breast cancer.	Talebi A and Bitarafan-Rajabi A and Alizadeh-Asl A and Seilani P and Khajetash B and Hajianfar G and Tavakoli M	Unclear	Low	Low	High	High	The overall risk of bias was judged High because the Analysis domain was rated High risk, driven by a high-dimensional radiomics feature space relative to sample size, reliance on internal validation only, lack of calibration assessment, and absence of external validation.
Machine learning modeling of cancer treatment-related cardiac events in breast cancer: utilizing dosiomics and radiomics	Dincer, S and Akmansu, M and Akyol, O	Unclear	Low	High	High	High	The overall risk of bias is High because multiple domains are rated High, particularly Outcome (use of a short-term biomarker threshold as a proxy for “cardiac events,” without clinical event adjudication) and Analysis (very small sample with high-dimensional radiomics/dosiomics, automated model/feature selection, internal-only validation, and no calibration reporting).
Machine Learning-Based Risk Assessment for Cancer Therapy-Related Cardiac Dysfunction in 4300 Longitudinal Oncology Patients.	Zhou Y and Hou Y and Hussain M and Brown SA and Budd T and Tang WHW and Abraham J and Xu B and Shah C and Moudgil R and Popovic Z and Cho L and Kanj M and Watson C and Griffin B and Chung MK and Kapadia S and Svensson L and Collier P and Cheng F	Low	Low	Low	High	High	The overall risk of bias was judged High because the Analysis domain was rated High risk, driven by reliance on internal validation only, complex machine-learning modeling without external validation, and limited reporting of calibration performance.
Percutaneous Coronary Intervention Mortality, Cost, Complications, and Disparities after Radiation Therapy: Artificial Intelligence-Augmented, Cost Effectiveness, and Computational Ethical Analysis	Monlezun, DJ	Low	Low	Low	High	High	The overall risk of bias was judged High because the Analysis domain was rated High risk. Although the study includes a very large, representative population with clearly defined predictors and objective outcomes, it does not present a validated clinical prediction model and relies on complex, iterative modeling without internal or external validation.
Predicting heart dose in left-sided breast cancer patients using volumetric modulated arc therapy: an anatomical feature-driven machine learning model	Patil, D and Zope, MK and Raj, R and Devi, S	Unclear	Low	Low	High	High	The overall risk of bias was judged High because the Analysis domain was rated High risk, driven by the small sample size, reliance on a single internal train–test split, absence of external validation, and lack of reported calibration.
Prediction of new-onset atrial fibrillation in patients with non-small cell lung cancer treated with curative-intent conventional radiotherapy.	Tohidinezhad F and Nürnberg L and Vaassen F and Ma Ter Bekke R and Jwl Aerts H and El Hendriks L and Dekker A and De Ruysscher D and Traverso A	Low	Low	Low	High	High	The overall risk of bias was judged High because the Analysis domain was rated High risk, driven by the use of stepwise variable selection, a limited number of outcome events relative to candidate predictors, reliance on internal validation only, and absence of external validation.
Prediction of Radiation Therapy Induced Cardiovascular Toxicity from Pretreatment CT Images in Patients with Thoracic Malignancy via an Optimal Biomarker Approach	Long, MJ and Alnoury, M and Udupa, JK and Tong, YB and Wu, CY and Poole, N and Mannikeri, S and Ky, B and Feigenberg, SJ and Zou, JW and O'Reilly, S and Torigian, DA	Low	Low	Low	High	High	The overall risk of bias is High because the Analysis domain was judged to be at High risk, driven by high-dimensional feature selection with a limited number of outcome events, reliance on internal validation only, and lack of comprehensive calibration assessment.
Predictive Value of Changes in Basal Myocardial 18F-Fluorodeoxyglucose Uptake for Cardiotoxicity in Patients With Locally Advanced Esophageal Cancer Receiving Definitive Radiation	Cai, GX and Wang, KY and Zhao, JR and Huang, BY and Wang, WQ and Wang, XH and Li, CB and Li, JS and Cheng, B and Yu, JM and Meng, X	Low	Low	Low	High	High	The overall risk of bias is High because the Analysis domain is High risk, primarily due to the limited number of outcome events relative to the multivariable modeling and data-driven variable selection strategy.
Radiomics Analysis on Computed Tomography Images for Prediction of Chemoradiation-induced Heart Failure in Breast Cancer by Machine Learning Models	Ansari, F and Neshasteh-Riz, A and Paydar, R and Mohagheghi, F and Felegari, S and Beigi, M and Cheraghi, S	Unclear	Low	Low	High	High	The overall risk of bias is High because the Analysis domain is High risk, driven by the combination of (1) a very small dataset, (2) high-dimensional radiomics with data-driven feature selection, (3) internal-only validation, and (4) lack of formal calibration reporting.
The Association of Incidental Radiation Dose to the Heart Base with Overall Survival and Cardiac Events after Curative-intent Radiotherapy for Non-small Cell Lung Cancer: Results from the NI-HEART Study.	Walls GM and O'Connor J and Harbinson M and Duane F and McCann C and McKavanagh P and Johnston DI and Giacometti V and McAleese J and Hounsell AR and Cole AJ and Butterworth KT and McGarry CK and Hanna GG and Jain S	Low	Low	Low	High	High	The analysis domain is high risk due to: Absence of internal or external validation, Limited events-per-variable, Incomplete reporting of model performance
The benefits evaluation of abdominal deep inspiration breath hold based on knowledge-based radiotherapy treatment planning for left-sided breast cancer	Xu, JQ and Wang, JZ and Zhao, F and Hu, WG and Yao, GR and Lu, ZJ and Yan, SX	Low	Low	Low	High	High	The overall risk of bias is High because the Analysis domain is High risk. While participants, predictors, and dosimetric outcomes are clearly defined and consistently measured, the work is not a clinical prediction model and uses limited single-setting validation (10-patient evaluation set) without external validation or calibration-style assessment.

## Sheet: PROBAST-Analysis
			Domain 1: Participant					Domain 2: Predictors				Domain 3: Outcome					Domain 4: Analaysis					Overall Assessment
			number	percent				number	percent			number	percent				number	percent				number	percent
		Low	22	71			Low	28	90		Low	26	84			Low	1	3			Low	1	3
		Unclear	8	26			Unclear	3	10		Unclear	3	10			Unclear	0	0			Unclear	0	0
		High	1	3			High	0	0		High	2	6			High	30	97			High	30	97
		Total	31	100			Total	31	100		Total	31	100			Total	31	100			Total	31	100

## Sheet:  Imaging-CLAIM
Article	Authors	Title/Abstract		Introduction		Methods - study design		Methods - Data							Methods - Reference standard					Methods - Data partitions		Methods - Testing Data	Methods - Model			Methods - Training			Methods- Evaluation							Results - Data		Results - Model performance			Discussion		Other info			Total	Percent
		1	2	3	4	5	6	7	8	9	10	11	12	13	14	15	16	17	18	19	20	21	22	23	24	25	26	27	28	29	30	31	32	33	34	35	36	37	38	39	40	41	42	43	44				26
		Al method: title explicitly names AL/ML method	Abstract summary: objectives, data, method, eval, and results	Clinical/scientific background & intended used	Study aims - explicitly stated	Prospective vs retrospective - explicitly labeled	Study goal - clearly stated: developement, validation, or both	Data sources - origin of datasets, eg. institution, study, registry..	Inclusion/exclusion criteria - explicitly defined	Data pre-processing - eg. resampling, normalization, ect.	Selection of data subsets - how training/validation/testing data were selected	De-identification	Handling of missing data - how missing data were adressed or stated as not present	Image acquisition protocol - imaging parameters and acquisition details	Reference standard definition - ground truth clearly stated eg. expert manual annotation	Rationale for reference standard - why this reference standard is appropriare	Source of annotations - who annotated	Annatation of test set - test data annotations clearly described	Inter-/intrarater variability - Variability assessed or explicitly reported	Assignment to partitions - method for assigning cases to train/val/test	Disjointment level - clarifies seperation is at patient, study, or image level?	Intended sample size - prior sample size/justification provided	Detailed model description - artchitecture, inputs/outputs and key components, unless previously validated elsewhere	Software libraries/frameworks - eg. PyTorch, TensorFlow	Model initiation - weight initialization or starting conditions described	Training approach details - loss functions, optimizer, epochs/iterations described	Final model selection - criteria for choosing final model	Ensembling techinques	Performance metrics	Statistical uncertainty - variablity reported (SD, IQR, CI, etc)	Robustness/sensitivity analysis (model's performance was tested under perturbation, variations or stress conditions)	Explainability/ interpretability - any explanability method applied/discussed	Internal validation	External validation	Clinical trial registration	numbers included/ excluded	demographics/ clinical characteristics - patient characteristics explicitly reported	Performance metrics - results for all stated metrics	Performance precision/ variability reported	Failure analysis - or examples of errors/failures	Study limitations explicitly disussed	Implications for practice	Protocol or techinical reference - eg. prior method, techinical appendix,..	Availability of code/model/data - statement on availability (public or upon request)	Funding sources/ role			Total of items
A deep Boltzmann machine-driven level set method for heart motion tracking using cine MRI images.	Wu J and Mazur TR and Ruan S and Lian C and Daniel N and Lashmett H and Ochoa L and Zoberi I and Anastasio MA and Gach HM and Mutic S and Thomas M and Li H	1	1	1	1	0	1	1	0	1	1	0	0	1	1	0	1	1	0	1	1	0	1	0	1	1	0	0	1	1	0	0	1	1	0	1	0	1	1	0	1	1	0	0	1	27	61.3636	44
AI-Based Quantification of Planned Radiation Therapy Dose to Cardiac Structures and Coronary Arteries in Patients With Breast Cancer	van Velzen, SGM and Bruns, S and Wolterink, JM and Leiner, T and Viergever, MA and Verkooijen, HM and Isgum, I	1	1	1	1	1	1	1	0	1	1	1	0	1	1	1	1	1	0	1	1	0	1	0	1	1	0	1	1	1	0	0	1	1	0	1	0	1	1	0	1	1	1	1	1	33	75	44
AI-Based Radiation Dose Quantification for Estimation of Heart Disease Risk in Breast Cancer Survivors After Radiation Therapy	van Velzen, SGM and Gal, R and Teske, AJ and van der Leij, F and van den Bongard, DHJG and Viergever, MA and Verkooijen, HM and Isgum, I	1	1	1	1	1	1	1	1	1	1	1	1	1	1	1	1	1	0	1	1	0	1	0	0	0	0	1	1	1	1	0	1	0	0	1	1	1	1	0	1	1	1	1	1	34	77.2727	44
Association between statin therapy dose intensity and radiation cardiotoxicity in non-small cell lung cancer: Results from the NI-HEART study.	Walls GM and O'Connor J and Harbinson M and McCarron EP and Duane F and McCann C and McKavanagh P and Johnston DI and Erekkath J and Giacometti V and Gavin AT and McAleese J and Hounsell AR and Cole AJ and Butterworth KT and McGarry CK and Hanna GG and Jain S	1	1	1	1	1	1	1	1	0	1	0	1	1	1	1	1	1	0	0	0	0	0	0	0	0	0	0	1	1	1	0	1	0	0	1	1	1	1	0	1	1	1	0	1	22	50	44
Association of cardiac calcium burden with overall survival after radiotherapy for non-small cell lung cancer	Haseltine, JM and Apte, A and Jackson, A and Yorke, E and Yu, AF and Plodkowski, A and Wu, A and Peleg, A and Al-Sadawi, M and Iocolano, M and Gelblum, D and Shaverdian, N and Simone , CB II and Rimner, A and Gomez, DR and Shepherd, AF and Thor, M	1	1	1	1	1	1	1	1	1	1	0	1	1	1	1	1	1	0	0	0	0	0	0	1	0	0	0	1	1	0	0	1	0	0	1	1	1	1	0	1	1	1	0	1	28	63.6364	44
Automated contouring for breast cancer radiotherapy in the isocentric lateral decubitus position: a neural network-based solution for enhanced precision and efficiency	Loap, P and Monteil, R and Kirova, Y and Vu-Bezin, J	1	1	1	1	1	1	1	1	1	1	0	0	1	1	1	1	1	1	1	1	0	1	1	1	1	0	0	1	1	0	0	1	0	0	1	0	1	1	0	1	1	1	1	0	32	72.7273	44
Automated coronary artery calcium scoring in patients with breast cancer to assess the risk of heart disease following adjuvant radiation therapy.	Kim K and Chung SY and Oh C and Cho I and Kim KH and Byun HK and Yoon HI and Oh J and Chang JS	1	1	1	1	1	1	1	1	1	1	1	0	1	1	1	1	1	1	0	0	0	1	1	0	1	0	0	1	1	1	0	1	1	0	1	1	1	1	0	1	1	1	1	1	34	77.2727	44
Automatic Cardiac Structure Contouring for Small Datasets with Cascaded Deep Learning Models.	van den Oever LB and Spoor DS and Crijns APG and Vliegenthart R and Oudkerk M and Veldhuis RNJ and de Bock GH and van Ooijen PMA	1	1	1	1	1	1	1	0	1	1	0	0	1	1	1	1	1	0	1	1	0	1	1	1	1	1	1	1	0	0	0	1	0	0	1	0	1	1	1	1	1	0	0	1	31	70.4545	44
Automatic delineation of cardiac substructures using a region-based fully convolutional network.	Harms J and Lei Y and Tian S and McCall NS and Higgins KA and Bradley JD and Curran WJ and Liu T and Yang X	1	1	1	1	1	1	1	0	1	1	0	0	1	1	1	1	1	0	1	1	0	1	0	0	1	0	1	1	1	1	0	1	0	0	1	0	1	1	1	1	1	0	1	0	30	68.1818	44
Automatic quantification of calcifications in the coronary arteries and thoracic aorta on radiotherapy planning CT scans of Western and Asian breast cancer patients	Gernaat, SAM and van Velzen, SGM and Koh, V and Emaus, MJ and Isgum, I and Lessmann, N and Moes, S and Jacobson, A and Tan, PW and Grobbee, DE and van den Bongard, DHJ and Tang, JI and Verkooijen, HM	1	1	1	1	0	1	1	1	1	1	0	0	1	1	0	1	1	0	1	1	0	1	0	0	1	0	0	1	1	1	0	1	1	0	1	1	1	1	0	1	1	0	0	1	29	65.9091	44
Automatic segmentation of cardiac structures can change the way we evaluate dose limits for radiotherapy in the left breast	Borges, MG and Gruenwaldt, J and Barsanelli, DM and Ishikawa, KE and Stuart, SR	1	1	1	1	1	1	1	1	1	0	0	0	0	0	0	0	0	0	0	0	0	0	1	0	0	0	0	0	1	1	0	1	0	0	1	0	0	0	0	1	1	1	1	1	19	43.1818	44
Bragatston study protocol: a multicentre cohort study on automated quantification of cardiovascular calcifications on radiotherapy planning CT scans for cardiovascular risk prediction in patients with breast cancer.	Emaus MJ and Išgum I and van Velzen SGM and van den Bongard HJGD and Gernaat SAM and Lessmann N and Sattler MGA and Teske AJ and Penninkhof J and Meijer H and Pignol JP and Verkooijen HM	1	1	1	1	1	1	1	1	0	1	1	1	1	1	1	1	1	0	0	0	1	1	0	0	0	0	0	1	1	1	0	1	0	1	0	0	0	0	0	1	1	0	0	1	26	59.0909	44
Cardiac Substructure Dose and Survival in Stereotactic Radiotherapy for Lung Cancer: Results of the Multi-Centre SSBROC Trial	Chin, V and Chlap, P and Finnegan, R and Hau, E and Ong, A and Ma, X and Descallar, J and Otton, J and Holloway, L and Delaney, GP and Vinod, SK	1	1	1	1	1	1	1	0	0	0	0	0	1	0	0	0	0	0	0	0	0	1	1	0	0	0	0	0	1	0	0	1	0	1	1	0	0	0	0	1	1	1	1	1	19	43.1818	44
Cardiac substructure segmentation with deep learning for improved cardiac sparing.	Morris ED and Ghanem AI and Dong M and Pantelic MV and Walker EM and Glide-Hurst CK	1	1	1	1	1	1	1	1	1	1	0	0	1	1	1	1	1	0	1	1	1	1	0	0	1	1	0	1	1	1	0	1	0	0	1	0	1	1	1	1	1	0	0	0	31	70.4545	44
Cardiopulmonary Substructure Doses are Not Correlated With Cardiorespiratory Fitness Among Breast Cancer Survivors Treated With Contemporary Radiation Therapy	Thor, M and Scott, JM and Reiner, AS and Hong, LD and Yu, AF and Apte, A and Mccormick, B and Perez-Andujar, A and Lee, CP and Cervino, L and Harrison, J and Liang, XL and Patel, P and Dauer, LT and Moskowitz, CS and Bernstein, JL	1	1	1	1	1	1	1	1	1	1	0	0	1	1	0	0	0	0	0	0	1	1	1	0	0	0	0	1	1	0	0	1	0	0	1	1	1	0	0	1	1	1	1	1	26	59.0909	44
Clinical Feasibility of Artificial Intelligence-Based Autosegmentation of the Left Anterior Descending Artery in Radiotherapy for Breast Cancer	Mohan, A and Talapatra, K and Sankhe, M and Kiron, G and Maniar, P and Kolekar, A and Kushe, S and Kharote, P and Singh, A and Patel, K and Gupta, A and Patel, D and Bardeskar, N and Patkar, D	1	1	1	1	1	1	1	1	1	1	1	1	1	1	1	1	1	0	0	0	1	1	1	0	1	0	0	1	0	0	0	1	0	0	1	0	1	0	1	1	1	0	0	1	29	65.9091	44
Deep Learning for Automatic Calcium Scoring in CT: Validation Using Multiple Cardiac CT and Chest CT Protocols.	van Velzen SGM and Lessmann N and Velthuis BK and Bank IEM and van den Bongard DHJG and Leiner T and de Jong PA and Veldhuis WB and Correa A and Terry JG and Carr JJ and Viergever MA and Verkooijen HM and Išgum I	1	1	1	1	1	1	1	1	1	1	0	0	1	1	1	1	1	0	1	1	1	1	0	0	1	0	0	1	1	0	0	1	1	0	1	1	1	1	1	1	1	0	0	0	31	70.4545	44
Deep learning model for automatic contouring of cardiovascular substructures on radiotherapy planning CT images: Dosimetric validation and reader study based clinical acceptability testing.	Garrett Fernandes M and Bussink J and Stam B and Wijsman R and Schinagl DAX and Monshouwer R and Teuwen J	1	1	1	1	1	1	1	1	1	1	0	0	1	1	1	1	1	0	1	1	1	1	1	0	1	1	0	1	1	1	0	1	1	0	1	1	1	1	1	1	1	1	1	1	37	84.0909	44
Deep learning-based automatic segmentation of cardiac substructures for lung cancers.	Chen X and Mumme RP and Corrigan KL and Mukai-Sasaki Y and Koutroumpakis E and Palaskas NL and Nguyen CM and Zhao Y and Huang K and Yu C and Xu T and Daniel A and Balter PA and Zhang X and Niedzielski JS and Shete SS and Deswal A and Court LE and Liao Z and Yang J	1	1	1	1	0	1	1	1	1	1	0	0	1	1	1	1	1	0	1	1	1	1	1	0	1	1	1	1	1	1	0	1	0	0	1	1	1	1	1	1	1	1	1	1	36	81.8182	44
Deep-learning system to improve the quality and efficiency of volumetric heart segmentation for breast cancer	Zeleznik, R and Weiss, J and Taron, J and Guthier, C and Bitterman, DS and Hancox, C and Kann, BH and Kim, DW and Punglia, RS and Bredfeldt, J and Foldyna, B and Eslami, P and Lu, MC and Hoffmann, U and Mak, R and Aerts, HJWL	1	1	1	1	1	1	1	1	0	1	0	0	1	1	1	1	1	1	1	0	1	1	1	0	1	0	0	1	1	1	0	1	1	0	1	1	1	1	1	1	1	1	0	0	33	75	44
Elevated Coronary Artery Calcium Quantified by a Validated Deep Learning Model From Lung Cancer Radiotherapy Planning Scans Predicts Mortality	Atkins, KM and Weiss, J and Zeleznik, R and Bitterman, DS and Chaunzwa, TL and Huynh, E and Guthier, C and Kozono, DE and Lewis, JH and Tamarappoo, BK and Nohria, A and Hoffmann, U and Aerts, HJWL and Mak, RH	1	1	1	1	1	1	1	1	1	1	0	1	1	1	1	1	1	0	1	1	1	1	0	0	1	0	0	1	1	1	0	1	1	0	1	1	1	0	0	1	1	1	0	1	33	75	44
Evaluation of a delineation software for cardiac atlas-based autosegmentation: An example of the use of artificial intelligence in modern radiotherapy	Loap, P and Tkatchenko, N and Kirova, Y	1	1	1	1	1	1	1	1	0	1	0	0	1	1	1	1	1	0	1	1	1	1	1	0	1	0	0	1	1	0	0	1	0	0	1	0	1	1	1	1	1	0	1	1	31	70.4545	44
Identification of Risk of Cardiovascular Disease by Automatic Quantification of Coronary Artery Calcifications on Radiotherapy Planning CT Scans in Patients With Breast Cancer.	Gal R and van Velzen SGM and Hooning MJ and Emaus MJ and van der Leij F and Gregorowitsch ML and Blezer ELA and Gernaat SAM and Lessmann N and Sattler MGA and Leiner T and de Jong PA and Teske AJ and Verloop J and Penninkhof JJ and Vaartjes I and Meijer H and van Tol-Geerdink JJ and Pignol JP and van den Bongard DHJG and Išgum I and Verkooijen HM	1	1	1	1	1	1	1	1	1	1	1	0	1	1	1	1	0	1	0	0	1	1	0	0	0	0	0	1	1	1	0	1	0	0	1	1	1	0	0	1	1	1	0	1	29	65.9091	44
Implementation of a Commercial Deep Learning-Based Auto Segmentation Software in Radiotherapy: Evaluation of Effectiveness and Impact on Workflow	Radici, L and Ferrario, S and Borca, VC and Cante, D and Paolini, M and Piva, C and Baratto, L and Franco, P and La Porta, MR	1	1	1	1	1	1	1	1	1	1	0	0	1	1	1	1	1	0	0	0	1	1	1	0	1	0	0	1	1	0	0	1	0	0	1	0	1	1	1	1	1	1	1	1	31	70.4545	44
Incorporating sensitive cardiac substructure sparing into radiation therapy planning.	Morris ED and Aldridge K and Ghanem AI and Zhu S and Glide-Hurst CK	1	1	1	1	1	1	1	0	1	0	0	0	1	1	1	1	0	0	0	0	1	1	1	0	0	0	0	1	1	1	1	1	0	0	1	0	1	0	0	1	1	0	0	1	25	56.8182	44
Mutual enhancing learning-based automatic segmentation of CT cardiac substructure.	Momin S and Lei Y and McCall NS and Zhang J and Roper J and Harms J and Tian S and Lloyd MS and Liu T and Bradley JD and Higgins K and Yang X	1	1	1	1	1	1	1	1	1	1	0	0	1	1	1	1	1	0	1	1	1	1	1	1	1	1	0	1	1	0	1	1	1	0	1	1	1	1	0	1	1	0	0	0	34	77.2727	44
Novel Functional Radiomics for Prediction of Cardiac Positron Emission Tomography Avidity in Lung Cancer Radiotherapy.	Choi W and Jia Y and Kwak J and Werner-Wasik M and Dicker AP and Simone NL and Storozynsky E and Jain V and Vinogradskiy Y	1	1	1	1	1	1	1	1	1	1	0	0	1	1	1	1	1	1	1	1	1	1	1	1	1	1	1	1	1	1	1	1	1	0	1	0	1	1	0	1	1	1	1	1	39	88.6364	44
Open-source, fully-automated hybrid cardiac substructure segmentation: development and optimisation.	Finnegan RN and Chin V and Chlap P and Haidar A and Otton J and Dowling J and Thwaites DI and Vinod SK and Delaney GP and Holloway L	1	1	1	1	1	1	1	1	1	1	0	0	1	1	1	1	1	1	1	1	1	1	1	1	1	1	1	1	1	1	1	1	0	0	1	1	1	1	1	1	1	1	1	1	40	90.9091	44
Prospective deployment of an automated implementation solution for artificial intelligence translation to clinical radiation oncology	Kehayias, CE and Yan, YJ and Bontempi, D and Quirk, S and Bitterman, DS and Bredfeldt, JS and Aerts, HJWL and Mak, RH and Guthier, CV	1	1	1	1	1	1	1	1	1	1	1	0	1	1	1	1	1	0	1	0	1	1	1	0	1	0	0	1	1	0	0	1	0	0	1	0	1	1	1	1	1	1	1	1	33	75	44
RootPainter3D: Interactive-machine-learning enables rapid and accurate contouring for radiotherapy	Smith, AG and Petersen, J and Terrones-Campos, C and Berthelsen, AK and Forbes, NJ and Darkner, S and Specht, L and Vogelius, IR	1	1	1	1	1	1	1	1	1	1	0	0	1	1	1	1	1	0	1	1	1	1	1	1	1	1	0	1	1	1	1	1	0	0	1	0	1	1	1	1	1	1	1	0	36	81.8182	44
Synthetic contrast-enhanced computed tomography generation using a deep convolutional neural network for cardiac substructure delineation in breast cancer radiation therapy: a feasibility study.	Chun J and Chang JS and Oh C and Park I and Choi MS and Hong CS and Kim H and Yang G and Moon JY and Chung SY and Suh YJ and Kim JS	1	1	1	1	1	1	1	1	1	1	0	0	1	1	1	1	1	0	1	1	1	1	1	1	1	1	0	1	1	0	0	1	0	0	1	0	1	1	0	1	1	1	0	0	32	72.7273	44
The influence of cardiac substructure dose on survival in a large lung cancer stereotactic radiotherapy cohort using a robust personalized contour analysis	van der Pol, LHG and Pomp, J and Hoesein, FAAM and Raaymakers, BW and Verhoeff, JJC and Fast, MF	1	1	1	1	1	1	1	1	1	1	0	1	1	1	1	1	1	0	1	1	0	1	1	1	1	1	0	1	1	1	1	1	0	0	1	1	1	1	1	1	1	1	1	1	38	86.3636	44
Validation of a Fully Automated Hybrid Deep Learning Cardiac Substructure Segmentation Tool for Contouring and Dose Evaluation in Lung Cancer Radiotherapy	Chin, V and Finnegan, RN and Chlapy, P and Otton, J and Haidar, A and Holloway, L and Thwaites, DI and Dowling, J and Delaney, GP and Vinod, SK	1	1	1	1	1	1	1	1	1	1	0	0	1	1	1	1	1	0	1	1	1	1	1	0	1	0	0	1	1	1	0	1	1	0	1	1	1	1	1	1	1	1	1	0	36	81.8182	44
Validation of an established deep learning auto-segmentation tool for cardiac substructures in 4D radiotherapy planning scans	Walls, GM and Giacometti, V and Apte, A and Thor, M and McCann, C and Hanna, GG and 'Connor, J and Deasy, JO and Hounsell, AR and Butterworth, KT and Cole, AJ and Jain, S and McGarry, CK	1	1	1	1	1	1	1	1	1	1	1	0	1	1	1	1	1	0	0	0	1	1	1	0	1	0	0	1	1	1	0	1	0	0	1	1	1	1	1	1	1	1	1	1	34	77.2727	44
Total number		34	34	34	34	31	34	34	28	29	31	8	7	33	32	29	31	29	6	22	20	21	31	22	11	25	10	7	32	32	20	6	34	11	2	33	17	31	26	16	34	34	23	19	25
Percent (%)		100	100	100	100	91.1765	100	100	82.3529	85.2941	91.1765	23.5294	20.5882	97.0588	94.1176	85.2941	91.1765	85.2941	17.6471	64.7059	58.8235	61.7647	91.1765	64.7059	32.3529	73.5294	29.4118	20.5882	94.1176	94.1176	58.8235	17.6471	100	32.3529	5.88235	97.0588	50	91.1765	76.4706	47.0588	100	100	67.6471	55.8824	73.5294	70.9893	70.7219
Total articles		34	34	34	34	34	34	34	34	34	34	34	34	34	34	34	34	34	34	34	34	34	34	34	34	34	34	34	34	34	34	34	34	34	34	34	34	34	34	34	34	34	34	34	34

## Sheet: QUADAS-2-Updated
		Patient Selection					Index Text				Reference Standard				Flow and Timing
Article	Authors	1. Was a consecutive or random sample of patients enrolled?	2. Was a case–control design avoided?	3. Did the study avoid inappropriate exclusions?	Risk		4. Were the index test results interpreted without knowledge of the results of the reference standard?	5. If a threshold was used, was it pre‐ specified?	Risk		6. Is the reference standard likely to correctly classify the target condition?	7. Were the reference standard results interpreted without knowledge of the results of the index test?	Risk		8. Was there an appropriate interval between index tests and reference standard?	9. Did all patients receive a reference standard?	10. Did all patients receive the same reference standard?	11. Were all patients included in the analysis?	Risk	Overall Risk	Total number of questions	Number of Yes	Percent % of Yes	Number of Unclear	Percent % of Unclear	Number of No	Percent % of No	Comments
A deep Boltzmann machine-driven level set method for heart motion tracking using cine MRI images.	Wu J and Mazur TR and Ruan S and Lian C and Daniel N and Lashmett H and Ochoa L and Zoberi I and Anastasio MA and Gach HM and Mutic S and Thomas M and Li H	0	1	1	High	1	0	1	High		1	1	Low		1	1	1	1	Low	High	11	11	100	0	0	0	0	The overall study flow, reference standard application, and index test evaluation are sufficiently coherent to support a generally low concern for bias.
AI-Based Quantification of Planned Radiation Therapy Dose to Cardiac Structures and Coronary Arteries in Patients With Breast Cancer	van Velzen, SGM and Bruns, S and Wolterink, JM and Leiner, T and Viergever, MA and Verkooijen, HM and Isgum, I	Unclear	1	Unclear	Unclear	0	0	1	High		1	0	High		1	1	1	1	Low	High	11	9	81.8182	2	18.1818	0	0	This study demonstrates low overall risk of bias by QUADAS-2 criteria. Patient selection is retrospective but systematic, the AI index test and manual reference annotations are clearly defined and consistently applied, and all patients follow the same verification pathway with complete inclusion in analysis.
AI-Based Radiation Dose Quantification for Estimation of Heart Disease Risk in Breast Cancer Survivors After Radiation Therapy	van Velzen, SGM and Gal, R and Teske, AJ and van der Leij, F and van den Bongard, DHJG and Viergever, MA and Verkooijen, HM and Isgum, I	1	1	Unclear	Unclear		1	1	Low		1	1	Low		1	1	1	Unclear	Unclear	Unclear	11	9	81.8182	2	18.1818	0	0	This is a methodologically strong diagnostic/prognostic imaging study with low risk of bias across all QUADAS-2 domains and no major applicability concerns.
Association between statin therapy dose intensity and radiation cardiotoxicity in non-small cell lung cancer: Results from the NI-HEART study.	Walls GM and O'Connor J and Harbinson M and McCarron EP and Duane F and McCann C and McKavanagh P and Johnston DI and Erekkath J and Giacometti V and Gavin AT and McAleese J and Hounsell AR and Cole AJ and Butterworth KT and McGarry CK and Hanna GG and Jain S	1	1	Unclear	Unclear		1	1	Low		1	1	Low		1	1	1	1	Low	Unclear	11	10	90.9091	1	9.09091	0	0	The cohort design, consistent outcome definitions, uniform follow-up, and complete inclusion support a low overall risk of bias.
Association of cardiac calcium burden with overall survival after radiotherapy for non-small cell lung cancer	Haseltine, JM and Apte, A and Jackson, A and Yorke, E and Yu, AF and Plodkowski, A and Wu, A and Peleg, A and Al-Sadawi, M and Iocolano, M and Gelblum, D and Shaverdian, N and Simone , CB II and Rimner, A and Gomez, DR and Shepherd, AF and Thor, M	1	1	Unclear	Unclear		1	1	Low		1	1	Low		1	1	1	Unclear	Unclear	Unclear	11	9	81.8182	2	18.1818	0	0	The cohort is clearly defined, thresholds are prespecified, exclusions are clinically appropriate, and follow-up is uniform, resulting in a low overall risk of bias.
Automated contouring for breast cancer radiotherapy in the isocentric lateral decubitus position: a neural network-based solution for enhanced precision and efficiency	Loap, P and Monteil, R and Kirova, Y and Vu-Bezin, J	1	1	Unclear	Unclear		1	1	Low		1	Unclear	Unclear		1	1	1	1	Low	Unclear	11	9	81.8182	2	18.1818	0	0	This study reports a large, systematically assembled single-institution cohort, uses routine clinical manual contours as the reference standard, applies the same verification approach across patients, and provides a clearly described train/validation split with quantitative comparison of AI contours to the manual reference.
Automated coronary artery calcium scoring in patients with breast cancer to assess the risk of heart disease following adjuvant radiation therapy.	Kim K and Chung SY and Oh C and Cho I and Kim KH and Byun HK and Yoon HI and Oh J and Chang JS	Unclear	1	Unclear	Unclear		1	1	Low		1	1	Low		1	1	1	Unclear	Unclear	Unclear	11	8	72.7273	3	27.2727	0	0	This large retrospective cohort study demonstrates low risk of bias across all QUADAS-2 domains when CAC scoring is treated as the index test and clinically adjudicated cardiac events as the reference standard.
Automatic Cardiac Structure Contouring for Small Datasets with Cascaded Deep Learning Models.	van den Oever LB and Spoor DS and Crijns APG and Vliegenthart R and Oudkerk M and Veldhuis RNJ and de Bock GH and van Ooijen PMA	0	1	Unclear	High	1	1	1	Low		1	1	Low		1	1	1	1	Low	High	11	10	90.9091	1	9.09091	0	0	This study demonstrates a low overall risk of bias
Automatic delineation of cardiac substructures using a region-based fully convolutional network.	Harms J and Lei Y and Tian S and McCall NS and Higgins KA and Bradley JD and Curran WJ and Liu T and Yang X	Unclear	1	Unclear	Unclear	0	0	1	High		1	1	Low		1	1	1	1	Low	High	11	9	81.8182	2	18.1818	0	0	This is a well-conducted retrospective AI segmentation study with low overall risk of bias
Automatic quantification of calcifications in the coronary arteries and thoracic aorta on radiotherapy planning CT scans of Western and Asian breast cancer patients	Gernaat, SAM and van Velzen, SGM and Koh, V and Emaus, MJ and Isgum, I and Lessmann, N and Moes, S and Jacobson, A and Tan, PW and Grobbee, DE and van den Bongard, DHJ and Tang, JI and Verkooijen, HM	1	1	Unclear	Unclear	0	0	1	High		1	Unclear	Unclear		1	0	1	Unclear	High	High	11	7	63.6364	3	27.2727	1	9.09091	This study is strong for patient selection and prespecified thresholds, but has important limitations for diagnostic accuracy assessment: lack of explicit blinding between index test and reference standard, and partial verification bias because only a subset received manual reference annotation and were included in reproducibility analyses.
Automatic segmentation of cardiac structures can change the way we evaluate dose limits for radiotherapy in the left breast	Borges, MG and Gruenwaldt, J and Barsanelli, DM and Ishikawa, KE and Stuart, SR	0	1	1	High	1	0	1	High		1	0	High		1	1	1	1	Low	High	11	11	100	0	0	0	0	This study shows elevated risk of bias in Patient Selection, Index Test, and Reference Standard domains due to non-random sampling and lack of explicit blinding between AI segmentation and clinician-derived contours. Flow and timing are appropriate, and all patients are included with a consistent reference standard.
Bragatston study protocol: a multicentre cohort study on automated quantification of cardiovascular calcifications on radiotherapy planning CT scans for cardiovascular risk prediction in patients with breast cancer.	Emaus MJ and Išgum I and van Velzen SGM and van den Bongard HJGD and Gernaat SAM and Lessmann N and Sattler MGA and Teske AJ and Penninkhof J and Meijer H and Pignol JP and Verkooijen HM	1	0	1	High	1	0	1	High		1	Unclear	Unclear		1	0	0	0	High	High	11	7	63.6364	1	9.09091	3	27.2727	This is a protocol with a large cohort plus a case-cohort component, and it clearly defines the manual scoring approach and technical thresholds, but it does not report blinding procedures and it plans manual reference scoring only in a subset, which drives multiple “No” items.
Cardiac Substructure Dose and Survival in Stereotactic Radiotherapy for Lung Cancer: Results of the Multi-Centre SSBROC Trial	Chin, V and Chlap, P and Finnegan, R and Hau, E and Ong, A and Ma, X and Descallar, J and Otton, J and Holloway, L and Delaney, GP and Vinod, SK	1	1	Unclear	Unclear	0	1	0	High		1	1	Low		0	1	1	Unclear	High	High	11	8	72.7273	2	18.1818	1	9.09091	Overall, this is a low risk of bias for population definition, exposure measurement, and statistical analysis, with inherent limitations at the outcome/reference standard level that should temper interpretation of cardiac causality.
Cardiac substructure segmentation with deep learning for improved cardiac sparing.	Morris ED and Ghanem AI and Dong M and Pantelic MV and Walker EM and Glide-Hurst CK	0	1	Unclear	High	1	0	1	High		1	1	Low		1	1	1	1	Low	High	11	10	90.9091	1	9.09091	0	0	This study has elevated risk of bias in Patient Selection, Index Test, and Reference Standard domains. The primary concerns are non-consecutive sampling, lack of explicit blinding, and use of reference contours as training ground truth without independence from the index test.
Cardiopulmonary Substructure Doses are Not Correlated With Cardiorespiratory Fitness Among Breast Cancer Survivors Treated With Contemporary Radiation Therapy	Thor, M and Scott, JM and Reiner, AS and Hong, LD and Yu, AF and Apte, A and Mccormick, B and Perez-Andujar, A and Lee, CP and Cervino, L and Harrison, J and Liang, XL and Patel, P and Dauer, LT and Moskowitz, CS and Bernstein, JL	0	1	Unclear	High	1	0	1	High		1	0	High		1	1	1	1	Low	High	11	10	90.9091	1	9.09091	0	0	lack of explicit consecutive/random sampling, no detailed exclusions framework, and no reported blinding/independence between AI-derived dose metrics and CPET assessment.
Clinical Feasibility of Artificial Intelligence-Based Autosegmentation of the Left Anterior Descending Artery in Radiotherapy for Breast Cancer	Mohan, A and Talapatra, K and Sankhe, M and Kiron, G and Maniar, P and Kolekar, A and Kushe, S and Kharote, P and Singh, A and Patel, K and Gupta, A and Patel, D and Bardeskar, N and Patkar, D	0	1	Unclear	High	1	0	1	High		0	Unclear	High		1	1	1	1	Low	High	11	9	81.8182	2	18.1818	0	0	This study has high risk of bias in Patient Selection, Index Test, and Reference Standard domains. Key limitations include very small, non-consecutive sampling, lack of blinding, and use of a single-observer manual contour as the reference standard, which the authors themselves acknowledge as a limitation.
Deep Learning for Automatic Calcium Scoring in CT: Validation Using Multiple Cardiac CT and Chest CT Protocols.	van Velzen SGM and Lessmann N and Velthuis BK and Bank IEM and van den Bongard DHJG and Leiner T and de Jong PA and Veldhuis WB and Correa A and Terry JG and Carr JJ and Viergever MA and Verkooijen HM and Išgum I	Unclear	1	1	Unclear	0	0	1	High		1	Unclear	Low		1	1	0	0	High	High	11	7	63.6364	2	18.1818	2	18.1818	lack of blinding, heterogeneity in reference standards across datasets, and exclusions for feasibility/artifacts. Overall, this study is best classified as moderate risk of bias
Deep learning model for automatic contouring of cardiovascular substructures on radiotherapy planning CT images: Dosimetric validation and reader study based clinical acceptability testing.	Garrett Fernandes M and Bussink J and Stam B and Wijsman R and Schinagl DAX and Monshouwer R and Teuwen J	Unclear	1	0	High	1	0	1	High		1	0	High		1	1	1	0	High	High	11	9	81.8182	1	9.09091	1	9.09091	the main sources of bias are non-consecutive sampling, intentional case selection, explicit exclusions, and lack of blinding/independence between index test and reference standard. Flow and timing are appropriate, and the reference standard is strong. Overall, this study is best classified as moderate risk of bias
Deep learning-based automatic segmentation of cardiac substructures for lung cancers.	Chen X and Mumme RP and Corrigan KL and Mukai-Sasaki Y and Koutroumpakis E and Palaskas NL and Nguyen CM and Zhao Y and Huang K and Yu C and Xu T and Daniel A and Balter PA and Zhang X and Niedzielski JS and Shete SS and Deswal A and Court LE and Liao Z and Yang J	Unclear	1	1	Unclear		1	1	Low		1	1	Low		1	1	1	1	Low	Unclear	11	10	90.9091	1	9.09091	0	0	Overall Risk of Bias: LOW
Deep-learning system to improve the quality and efficiency of volumetric heart segmentation for breast cancer	Zeleznik, R and Weiss, J and Taron, J and Guthier, C and Bitterman, DS and Hancox, C and Kann, BH and Kim, DW and Punglia, RS and Bredfeldt, J and Foldyna, B and Eslami, P and Lu, MC and Hoffmann, U and Mak, R and Aerts, HJWL	1	1	1	Low	0	0	1	High		1	0	High		1	1	1	1	Low	High	11	11	100	0	0	0	0	This study is strong on patient selection (near-population capture) and complete flow (large final cohort with required clinical contours), but it does not explicitly report blinding/independence between AI outputs and the reference standard(s), which drives the main “No” judgments in Index Test/Reference Standard domains.
Elevated Coronary Artery Calcium Quantified by a Validated Deep Learning Model From Lung Cancer Radiotherapy Planning Scans Predicts Mortality	Atkins, KM and Weiss, J and Zeleznik, R and Bitterman, DS and Chaunzwa, TL and Huynh, E and Guthier, C and Kozono, DE and Lewis, JH and Tamarappoo, BK and Nohria, A and Hoffmann, U and Aerts, HJWL and Mak, RH	1	1	0	High	1	1	1	High		1	1	Low		1	1	1	1	Low	High	11	12	109.091	0	0	-1	-9.09091	The principal QUADAS-2 limitation lies in Patient Selection, where substantial exclusions based on CT technical characteristics and segmentation feasibility introduce potential selection bias. Overall, this is a well-conducted prognostic imaging study, but not a pure diagnostic-accuracy validation due to cohort attrition and lack of a gold-standard CAC comparator.
Evaluation of a delineation software for cardiac atlas-based autosegmentation: An example of the use of artificial intelligence in modern radiotherapy	Loap, P and Tkatchenko, N and Kirova, Y	1	1	0	High	1	0	1	High		1	0	High		1	1	1	1	Low	High	11	11	100	0	0	0	0	This is a small, internally consistent atlas/validation study with a strong reference standard and appropriate timing, but it does not report key bias protections
Identification of Risk of Cardiovascular Disease by Automatic Quantification of Coronary Artery Calcifications on Radiotherapy Planning CT Scans in Patients With Breast Cancer.	Gal R and van Velzen SGM and Hooning MJ and Emaus MJ and van der Leij F and Gregorowitsch ML and Blezer ELA and Gernaat SAM and Lessmann N and Sattler MGA and Leiner T and de Jong PA and Teske AJ and Verloop J and Penninkhof JJ and Vaartjes I and Meijer H and van Tol-Geerdink JJ and Pignol JP and van den Bongard DHJG and Išgum I and Verkooijen HM	1	1	1	Low	0	1	1	Low		1	1	Low		1	1	1	0	High	High	11	10	90.9091	0	0	1	9.09091	This is a methodologically strong diagnostic/prognostic accuracy study with low risk of bias across all QUADAS-2 domains.
Implementation of a Commercial Deep Learning-Based Auto Segmentation Software in Radiotherapy: Evaluation of Effectiveness and Impact on Workflow	Radici, L and Ferrario, S and Borca, VC and Cante, D and Paolini, M and Piva, C and Baratto, L and Franco, P and La Porta, MR	0	1	0	High	1	0	1	High		1	0	High		1	1	1	1	Low	High	11	10	90.9091	0	0	1	9.09091	this study has high risk of bias in Patient Selection and Index Test/Reference Standard domains due to non-consecutive convenience sampling, very small sample size, and lack of independence or blinding between AI outputs and clinician reference contours.
Incorporating sensitive cardiac substructure sparing into radiation therapy planning.	Morris ED and Aldridge K and Ghanem AI and Zhu S and Glide-Hurst CK	0	1	0	High	1	0	1	High		1	0	High		1	1	1	1	Low	High	11	10	90.9091	0	0	1	9.09091	this study has high risk of bias in Patient Selection and Index Test/Reference Standard domains due to small, non-consecutive sampling and lack of independence between AI-generated contours and physician-verified reference standards.
Mutual enhancing learning-based automatic segmentation of CT cardiac substructure.	Momin S and Lei Y and McCall NS and Zhang J and Roper J and Harms J and Tian S and Lloyd MS and Liu T and Bradley JD and Higgins K and Yang X	0	1	0	High		0	1	High		1	0	High		1	1	1	1	Low	High	11	10	90.9091	0	0	1	9.09091	this study has moderate risk of bias, driven primarily by non-consecutive patient selection and lack of independence/blinding between the deep-learning index test and the manual reference standard.
Novel Functional Radiomics for Prediction of Cardiac Positron Emission Tomography Avidity in Lung Cancer Radiotherapy.	Choi W and Jia Y and Kwak J and Werner-Wasik M and Dicker AP and Simone NL and Storozynsky E and Jain V and Vinogradskiy Y	0	1	0	High		0	1	High		1	Unclear	Unclear		1	1	1	0	High	High	11	8	72.7273	1	9.09091	2	18.1818	this study has moderate risk of bias, driven primarily by non-consecutive patient selection and post-hoc exclusion of poor-quality scans. The reference standard is clinically credible and independently applied, and flow/timing are appropriate.
Open-source, fully-automated hybrid cardiac substructure segmentation: development and optimisation.	Finnegan RN and Chin V and Chlap P and Haidar A and Otton J and Dowling J and Thwaites DI and Vinod SK and Delaney GP and Holloway L	0	1	Unclear	High		0	1	High		1	0	High		1	1	1	1	Low	High	11	10	90.9091	1	9.09091	0	0	this study demonstrates moderate risk of bias, primarily due to non-consecutive patient selection and lack of independence between the index test and reference standard.
Prospective deployment of an automated implementation solution for artificial intelligence translation to clinical radiation oncology	Kehayias, CE and Yan, YJ and Bontempi, D and Quirk, S and Bitterman, DS and Bredfeldt, JS and Aerts, HJWL and Mak, RH and Guthier, CV	0	1	Unclear	High		0	1	High		1	Unclear	Unclear		1	1	1	0	High	High	11	8	72.7273	2	18.1818	1	9.09091	this study has high risk of bias, primarily due to non-random patient selection, task-driven exclusions, and lack of independence between the AI system and the reference standard.
RootPainter3D: Interactive-machine-learning enables rapid and accurate contouring for radiotherapy	Smith, AG and Petersen, J and Terrones-Campos, C and Berthelsen, AK and Forbes, NJ and Darkner, S and Specht, L and Vogelius, IR	0	1	Unclear	High		0	Unclear	High		1	0	High		1	1	1	0	High	High	11	8	72.7273	2	18.1818	1	9.09091	this study has high risk of bias, primarily due to non-random patient selection, task-driven exclusions, and lack of independence between the AI system and the reference standard.
Synthetic contrast-enhanced computed tomography generation using a deep convolutional neural network for cardiac substructure delineation in breast cancer radiation therapy: a feasibility study.	Chun J and Chang JS and Oh C and Park I and Choi MS and Hong CS and Kim H and Yang G and Moon JY and Chung SY and Suh YJ and Kim JS	0	1	Unclear	High		0	Unclear	High		1	1	Low		1	1	1	1	Low	High	11	9	81.8182	2	18.1818	0	0	this study demonstrates moderate risk of bias, driven mainly by non-consecutive patient selection and direct dependence of the index test on the reference standard during model training.
The influence of cardiac substructure dose on survival in a large lung cancer stereotactic radiotherapy cohort using a robust personalized contour analysis	van der Pol, LHG and Pomp, J and Hoesein, FAAM and Raaymakers, BW and Verhoeff, JJC and Fast, MF	1	1	1	Low		0	1	High		1	0	High		1	1	1	1	Low	High	11	11	100	0	0	0	0	this study has moderate risk of bias, driven primarily by lack of independence between the index test and reference standard.
Validation of a Fully Automated Hybrid Deep Learning Cardiac Substructure Segmentation Tool for Contouring and Dose Evaluation in Lung Cancer Radiotherapy	Chin, V and Finnegan, RN and Chlapy, P and Otton, J and Haidar, A and Holloway, L and Thwaites, DI and Dowling, J and Delaney, GP and Vinod, SK	0	1	0	High		0	1	High		1	0	High		1	1	1	1	Low	High	11	10	90.9091	0	0	1	9.09091	this study has a moderate risk of bias. Risk of bias arises primarily from non-consecutive patient selection and lack of independence between index test and reference standard, inherent to segmentation validation studies.
Validation of an established deep learning auto-segmentation tool for cardiac substructures in 4D radiotherapy planning scans	Walls, GM and Giacometti, V and Apte, A and Thor, M and McCann, C and Hanna, GG and 'Connor, J and Deasy, JO and Hounsell, AR and Butterworth, KT and Cole, AJ and Jain, S and McGarry, CK	1	1	1	Low		1	1	Low		1	1	Low		1	1	1	0	High	High	11	10	90.9091	0	0	1	9.09091	This study demonstrates low risk of bias across all QUADAS-2 domains
Total of Yes		13	33	9			11	31			33	14			33	32	32	21
Percent % of Yes		38.2353	97.0588	26.4706			32.3529	91.1765			97.0588	41.1765			97.0588	94.1176	94.1176	61.7647
Total of articles		34	34	34			34	34			34	34			34	34	34	34
Number of Unclear		6	0	17			0	2			0	7			0	0	0	5
Percent % of Unclear		17.6471	0	50			0	5.88235			0	20.5882			0	0	0	14.7059
Number of No		15	1	8			23	1			1	13			1	2	2	8
% of N0		44.1176	2.94118	23.5294			67.6471	2.94118			2.94118	38.2353			2.94118	5.88235	5.88235	23.5294
Code	Answer		1 High risk
1	Yes		2 high risk
0	No		3 high risk
			4 high risk
Column1	Column2
Answers	Domain Risk
If one answer is No (0)	High
If one or more answers is Unclear (and No "No" answer)	Unclear
If all answers are Yes (1)	Low
Column1	High Risk number	High risk percent (%)	Unclear number	Unclear Percent %	Low Risk number	Column2	Low risk percent
Domain 1: Patient Selection	19	56	11	32	4		12
Domain 2: Index Test	25	74	0	0	9		26
Domain 3: Reference Standard	14	41	5	15	15		44
Domain 4: Flow and Timing	10	29	3	9	21		62
